# Supplementary material for: Graphene-enhanced platinum-catalysed hydrosilylation of amides and chalcones: a sustainable strategy allocated with in situ heterogenization and multitask application of H2PtCl6
Source: Royal Society of Chemistry journal article supplement (doi:10.1039/c7ra10541j), 2017-01-01

## *Supporting Information*

### **Graphene-Enhanced Platinum -Catalysed Hydrosilylation of Amides and Chalcones: A Sustainable Strategy Allocated with *in-situ* Heterogenization and Multi-Task Application of H<sub>2</sub>PtCl<sub>6</sub>**

Ning Li,<sup>a,b,†</sup> Xiao-Yun Dong,<sup>a,b,†</sup> Jing-Lei Zhang<sup>a</sup>, Ke-Fang Yang,<sup>b</sup> Zhan-Jiang  
Zheng,<sup>b</sup> Wei-Qiang Zhang,<sup>\*,a</sup> Zi-Wei Gao<sup>a</sup> and Li-Wen Xu<sup>\*,a,b</sup>

---

<sup>a.</sup> Key Laboratory of Applied Surface and Colloid Chemistry, Ministry of Education (MOE) and School of Chemistry and Chemical Engineering, Shaanxi Normal University, No. 620, West Chang'an Avenue, Xi'an 710062, P. R. China, E-mail: [liwenxu@snnu.edu.cn](mailto:liwenxu@snnu.edu.cn).

<sup>b.</sup> Key Laboratory of Organosilicon Chemistry and Material Technology of Ministry of Education, Hangzhou Normal University, No.1378 Wenyi West Road, Hangzhou 311121, P. R. China, E-mail: [liwenxu@hznu.edu.cn](mailto:liwenxu@hznu.edu.cn).

† N. Li and X.Y. Dong contributed equally to this work.

# Tables of Content

|                                                                                                                                                     |    |
|-----------------------------------------------------------------------------------------------------------------------------------------------------|----|
| 1. General Information .....                                                                                                                        | 3  |
| 2. General Procedure for the synthesis of PMHS@graphene (or G@PMHS) and Pt@G@Si .....                                                               | 4  |
| 2.1 General Procedure for synthesis of Graphene-dispersed PMHS. ....                                                                                | 4  |
| 2.2 General procedure for synthesis of amines and Pt@G@Si catalyst in the platinum-catalyzed reduction of amides .....                              | 5  |
| 2.2.1 General procedure for the preparation of amine (2). ....                                                                                      | 5  |
| 3. General procedure for the hydrosilylation reaction of chalcones.....                                                                             | 7  |
| 4. General Procedure for the conjugate addition of silyl enolates to ethyl acrylate .....                                                           | 14 |
| Table S1. Optimization of the platinum-catalyzed hydrosilylation of chalcone. <sup>[a]</sup> .....                                                  | 21 |
| Table S2. Pt@G@Si-catalyzed hydrosilylation of chalcones with various hydrosilanes. <sup>[a]</sup> .....                                            | 23 |
| Table S3. (PPh <sub>3</sub> ) <sub>2</sub> PtCl <sub>2</sub> catalyzed hydrosilylation of chalcones with various hydrosilanes. <sup>[a]</sup> ..... | 25 |
| 5. SEM, TEM, Raman, IR, XRD, XPS and ICP-MS spectra of Pt@G@Si and other platinum catalysts.....                                                    | 27 |
| Figure S1. SEM image of Pt@G@Si. ....                                                                                                               | 27 |
| Figure S2. TEM image of Pt@G@Si.....                                                                                                                | 28 |
| Figure S3. Raman spectra of Pt@G@Si. ....                                                                                                           | 31 |
| Figure S4. IR spectra of Pt@G@Si. ....                                                                                                              | 31 |
| Figure S5. XRD for Pt@Graphite@Si (PMHS@graphite powder@Pt) and Pt@G@Si (PMHS@graphene@Pt). ....                                                    | 33 |
| Figure S6. XRD for PMHS@graphene and PMHS@graphite. ....                                                                                            | 33 |
| Figure S7. SEM image of PMHS@graphene.....                                                                                                          | 29 |
| Figure S8. SEM image of PMHS@graphite. ....                                                                                                         | 29 |
| Figure S9. SEM image of Pt@Graphite@Si.....                                                                                                         | 30 |
| Figure S10. TEM image of Pt@Graphite@Si .....                                                                                                       | 30 |
| Figure S11. XPS analysis of Pt@G@Si. ....                                                                                                           | 31 |
| Figure S12. XPS analysis of Pt@Graphite@Si. ....                                                                                                    | 36 |
| Table S3. ICP-MS analysis of Pt@G@Si and other platinum catalysts. ....                                                                             | 26 |
| Figure S13. Spectra analysis of recovered Pt catalyst (Pt@G@Si) after hydrosilylation of chalcone.....                                              | 39 |
| Figure S14. Solid-state NMR analysis of Pt@G@Si and other material. ....                                                                            | 37 |
| 6. Copies of <sup>1</sup> H, <sup>13</sup> C, <sup>29</sup> Si and <sup>19</sup> F NMR spectra for the products. ....                               | 41 |

## 1. General Information

Unless specifically stated, all reagents were commercially obtained and where appropriate, purified prior to use. For example, all the aldehydes recrystallized or distilled prior to use. Dichloromethane, toluene, were freshly distilled from  $\text{CaH}_2$ , THF was freshly distilled from sodium metal prior to use. Other commercially available reagents and solvents were used directly without purification. Reactions were monitored by thin layer chromatography (TLC) using silica gel plates. Flash column chromatography was performed over silica (300-400 mesh).  $^1\text{H}$ ,  $^{13}\text{C}$ ,  $^{19}\text{F}$ , and  $^{29}\text{Si}$  spectra were recorded on a Bruker 400 MHz or 500 MHz spectrometer in  $\text{CDCl}_3$ . Multiplicities were given as: s(singlet); d (doublet); dd (doublets of doublet); t (triplet); q (quartet); or m (multiplets). High resolution mass spectra (HRMS) of the products were obtained on a Bruker Daltonics micro TOF-spectrometer. Infrared spectra were recorded on a Nexus 870 FTIR spectrometer. The morphology of the polymer fracture surface was characterized by scanning electron micrograph (SEM, Hitachi S3000N). The samples were frozen in liquid nitrogen and snapped immediately. Transmission electron microscopy (TEM) was carried out with the phosphotungstic acid staining method on a Hitachi H-7650 transmission electron microscope.

## 2. General Procedure for the synthesis of PMHS@graphene (or G@PMHS) and Pt@G@Si

### 2.1 General Procedure for synthesis of Graphene-dispersed PMHS.

A mixture of graphene (0.66 g, 27.6 mmol calculated to C=C) and Co(acac)<sub>2</sub> (5 mol%, 4.9 mg, 13.8 μmol) was treated with the PMHS (82.8 mmol, 5.34 g, 1.55% Si-H) under an argon atmosphere, and the solvent-free mixture was stirred at 100 °C. After it was allowed to stand for 24 h at the same temperature, the residues were passed through a funnel, washed with the distilled water, dried for 24 h at 80 °C under vacuum to give the graphene-dispersed PMHS material (G@PMHS).

The preparation of graphite-dispersed PMHS (PMHS@graphite or Graphite@PMHS) is similarly to above process.

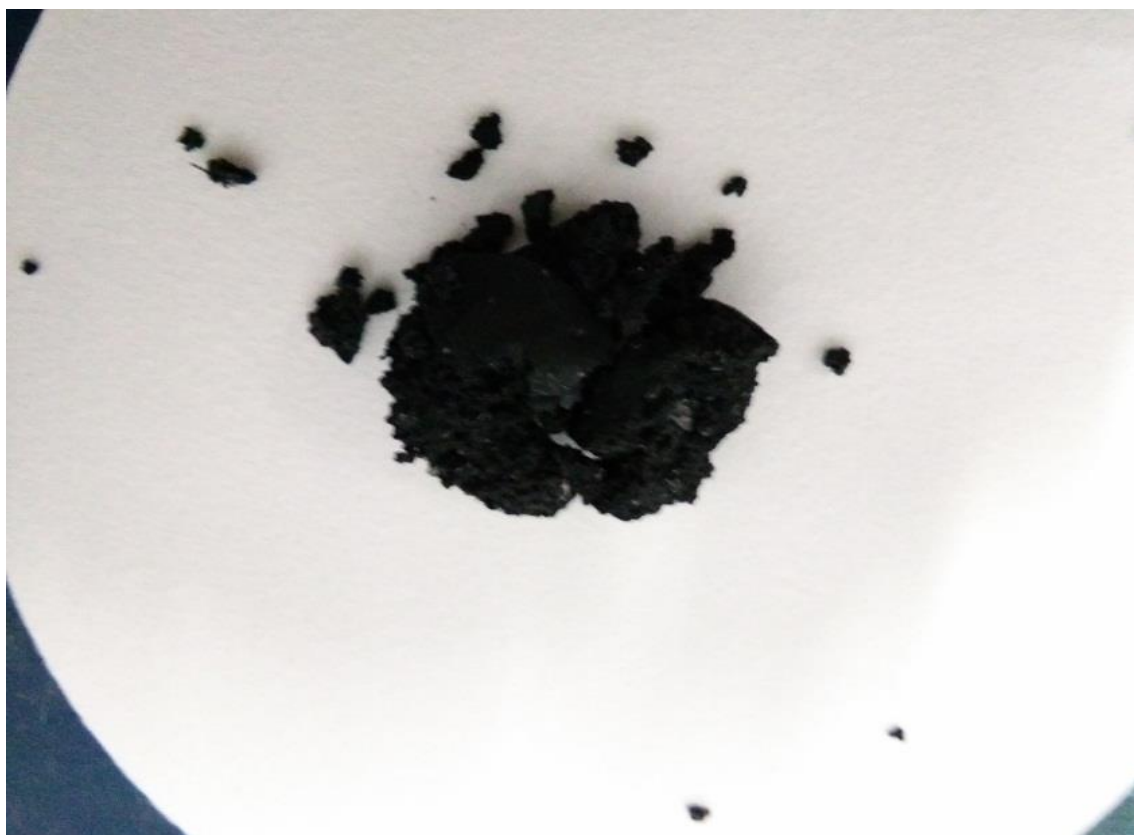

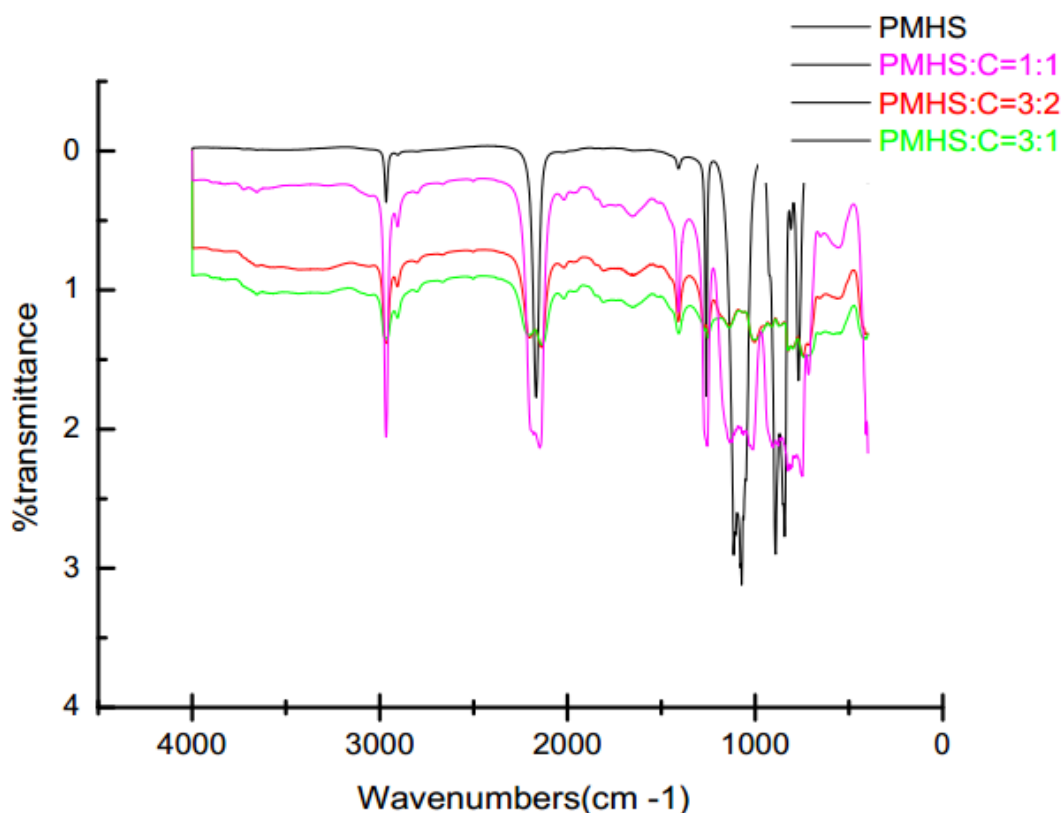

## 2.2 General procedure for synthesis of amines and Pt@G@Si catalyst in the platinum-catalyzed reduction of amides

### 2.2.1 General procedure for the preparation of amine (2)

A solution of amide **1** (1 mmol) and G@PMHS (3.0 equiv Si-H) was treated with a THF solution of  $\text{H}_2\text{PtCl}_6 \cdot 6\text{H}_2\text{O}$  (1 mol% based on the amide) at 60 °C. The homogeneous solution became gradually viscous, and set to gel. After it was allowed to stand for 4 h, the reaction mixture was extracted with EtOAc. The extracts were passed through a funnel, dried for 24 h at 80 °C under vacuum to give the graphene and cross-linked organosilicon-supported platinum catalyst (Pt@G@Si). For the isolation of the corresponding product in the reduction of amide, after removal of EtOAc, purification of residue by alumina column chromatography gave the amine **2**. These amine products were known products and have been reported elsewhere.

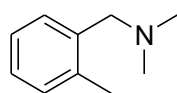

**N,N-dimethyl-1-(o-tolyl) methanamine (2a):**  $^1\text{H}$  NMR (400 MHz,  $\text{CDCl}_3$ )  $\delta$  7.23, 7.22, 7.19, 7.18, 7.15, 3.11, 2.79, 2.27.  $^{13}\text{C}$  NMR (101 MHz,  $\text{CDCl}_3$ )  $\delta$  171.3, 136.5, 133.7, 130.1, 128.5, 125.6, 38.1, 34.3, 18.6 ppm.

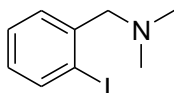

**1-(2-iodophenyl)-N,N-dimethylmethanamine (2b):**  $^1\text{H}$  NMR (400 MHz,  $\text{CDCl}_3$ )  $\delta$  7.82 (dd,  $J = 7.9, 0.9$  Hz, 1H), 7.38 (dd,  $J = 7.6, 1.6$  Hz, 1H), 7.31 (dd,  $J = 7.3, 0.8$  Hz, 1H), 6.93 (td,  $J = 7.6, 1.7$  Hz, 1H), 3.46 (s, 2H), 2.30 (s, 6H).  $^{13}\text{C}$  NMR (101 MHz,  $\text{CDCl}_3$ )  $\delta$  141.3, 139.6, 130.5, 128.8, 128.1, 100.8, 68.1, 45.6 ppm.

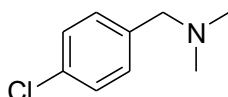

**1-(4-chlorophenyl)-N,N-dimethylmethanamine (2c):**  $^1\text{H}$  NMR (400 MHz,  $\text{CDCl}_3$ )  $\delta$  7.28 (s, 1H), 7.21 – 7.13 (m, 4H), 3.30 (s, 2H), 2.14 (s, 6H).  $^{13}\text{C}$  NMR (101 MHz,  $\text{CDCl}_3$ )  $\delta$  137.4, 132.8, 130.4, 128.8– 128.3, 68.0, 63.6, 45.3 ppm.

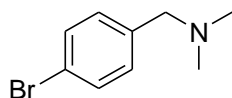

**1-(4-bromophenyl)-N,N-dimethylmethanamine (2d):**  $^1\text{H}$  NMR (400 MHz,  $\text{CDCl}_3$ )  $\delta$  7.42 – 7.37 (m, 2H), 7.15 (d,  $J = 8.3$  Hz, 2H), 3.32 (s, 2H), 2.18 (s, 6H).  $^{13}\text{C}$  NMR (101 MHz,  $\text{CDCl}_3$ )  $\delta$  137.9, 131.2, 30.5, 120.7, 63.5, 45.2 ppm.

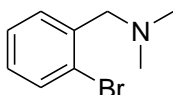

**1-(2-bromophenyl)-N,N-dimethylmethanamine (2e):**  $^1\text{H}$  NMR (400 MHz,  $\text{CDCl}_3$ )  $\delta$  7.52 (dd,  $J = 8.0, 0.8$  Hz, 1H), 7.40 (d,  $J = 1.5$  Hz, 1H), 7.26 (s, 1H), 7.08 (td,  $J = 7.8, 1.6$  Hz, 1H), 3.52 (s, 2H), 2.29 (s, 6H).  $^{13}\text{C}$  NMR (101 MHz,  $\text{CDCl}_3$ )  $\delta$  138.1, 132.8, 131.0, 128.5, 127.3, 124.8, 63.3, 45.5 ppm.

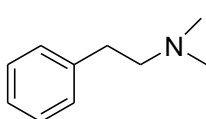

**N,N-dimethyl-2-phenylethanamine (2f):**  $^1\text{H}$  NMR (400 MHz,  $\text{CDCl}_3$ )  $\delta$  7.27 (dd,  $J = 12.1, 4.9$  Hz, 2H), 7.20 (d,  $J = 7.4$  Hz, 3H), 2.82 – 2.74 (m, 2H), 2.55 (dd,  $J = 9.7, 6.5$  Hz, 2H), 2.30 (s, 6H).  $^{13}\text{C}$  NMR (101 MHz,  $\text{CDCl}_3$ )  $\delta$  140.5, 128.7, 126.2, 61.6, 45.5, 34.4 ppm.

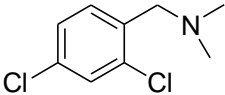 **1-(2,4-dichlorophenyl)-N,N-dimethylmethanamine (2g):**  $^1\text{H}$  NMR (400 MHz,  $\text{CDCl}_3$ )  $\delta$  7.36 (dd,  $J = 6.4, 5.5$  Hz, 2H), 7.20 (dd,  $J = 8.3, 2.1$  Hz, 1H), 3.48 (s, 2H), 2.27 (s, 6H).  $^{13}\text{C}$  NMR (101 MHz,  $\text{CDCl}_3$ )  $\delta$  135.3, 135.0, 133.2, 131.7, 129.3, 127.0, 60.2, 45.5 ppm.

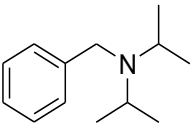 **N-benzyl-N-isopropylpropan-2-amine (2h):**  $^1\text{H}$  NMR (400 MHz,  $\text{CDCl}_3$ )  $\delta$  7.30 (d,  $J = 7.2$  Hz, 2H), 7.19 (dd,  $J = 15.8, 8.1$  Hz, 2H), 7.11 (d,  $J = 7.2$  Hz, 1H), 3.57 (s, 2H), 2.99 – 2.91 (m, 2H), 0.95 (d,  $J = 6.6$  Hz, 12H).  $^{13}\text{C}$  NMR (101 MHz,  $\text{CDCl}_3$ )  $\delta$  143.3, 128.1, 126.3, 49.1, 48.0, 29.9, 20.9 ppm.

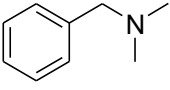 **N,N-dimethyl-1-phenylmethanamine (2i):**  $^1\text{H}$  NMR (400 MHz,  $\text{CDCl}_3$ )  $\delta$  7.26 (d,  $J = 4.5$  Hz, 4H), 7.19 (s, 1H), 3.42 (s, 2H), 2.23 (d,  $J = 10.4$  Hz, 6H).  $^{13}\text{C}$  NMR (101 MHz,  $\text{CDCl}_3$ )  $\delta$  129.4, 128.5, 127.4, 64.2, 45.1, 29.8 ppm.

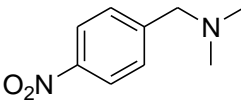 **N,N-dimethyl-1-(4-nitrophenyl)methanamine (2j):**  $^1\text{H}$  NMR (400 MHz,  $\text{CDCl}_3$ )  $\delta$  7.19 (t,  $J = 13.3$  Hz, 2H), 6.55 (d,  $J = 8.5$  Hz, 2H), 4.03 (s, 2H), 2.96 (s, 6H).

### 3. General procedure for the hydrosilylation reaction of chalcones

The triethylsilane (0.17 mL, 1.5 mmol, 3.0 equiv.), Pt@G@Si (10.2 mg, 25  $\mu\text{mol}$ , 5 mol%), and chalcone (104 mg, 0.5 mmol, 1.0 equiv.) was dissolved in anhydrous THF (1.0 mL). And then the reaction mixture was heated to 60  $^\circ\text{C}$  monitored by TLC until total conversion of the starting materials (about 3 hours). The reaction mixture was cooled to room temperature. After filtration under diminished pressure, the organic layer was diluted with 10.0 mL EtOAc, and aqueous layer was extracted with EtOAc

(5.0 mL×2). The combined organic layer was dried over Na<sub>2</sub>SO<sub>4</sub> and concentrated. The purification by silica gel flash chromatography (using petroleum : EtOAc = 10:1) to give the desired products with good yields. All the products are confirmed by MS, and usual spectral methods (<sup>1</sup>H-NMR, <sup>13</sup>C-NMR).

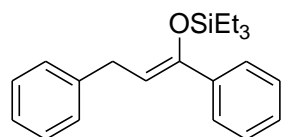

**1,3-diphenylprop-1-enyloxytriethylsilane (5a):** <sup>1</sup>H NMR (400 MHz, CDCl<sub>3</sub>) δ 7.39 (d, J = 6.9 Hz, 2H), 7.19 (t, J = 5.2 Hz, 3H), 7.17 – 7.15 (m, 3H), 7.15 – 7.05 (m, 2H), 5.22 (t, J = 7.2 Hz, 1H), 3.50 (d, J = 7.2 Hz, 2H), 0.85 (t, J = 7.9 Hz, 9H), 0.54 (q, J = 7.9 Hz, 6H). <sup>13</sup>C NMR (100 MHz, CDCl<sub>3</sub>) δ 150.3, 141.7, 139.55, 128.5, 128.1, 127.7, 125.9, 109.8, 77.4, 77.1, 76.8, 32.4, 6.8, 5.5, 5.2. HRMS (ESI): m/z: [M+H]<sup>+</sup> calculated for C<sub>21</sub>H<sub>29</sub>OSi: 325.1982, Found: 325.1971.

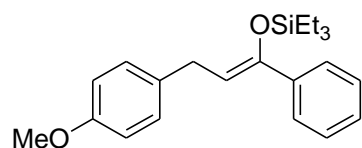

**3-(4-methoxyphenyl)-1-phenylprop-1-enyloxytriethylsilane (5b):** <sup>1</sup>H NMR (400 MHz, CDCl<sub>3</sub>) δ 7.47 (d, J = 7.7 Hz, 2H), 7.25 (t, J = 7.5 Hz, 2H), 7.23 (s, 1H), 7.16 (d, J = 7.8 Hz, 2H), 6.80 (d, J = 7.3 Hz, 2H), 5.29 (t, J = 7.1 Hz, 1H), 3.70 (s, 4H), 3.53 (d, J = 7.1 Hz, 2H), 0.94 (t, J = 8.0 Hz, 9H), 0.63 (q, J = 7.8 Hz, 6H). <sup>13</sup>C NMR (100 MHz, CDCl<sub>3</sub>) δ 158.1, 150.1, 139.7, 133.7, 129.4, 128.1, 125.8, 113.9, 110.3, 77.6, 77.3, 76.9, 55.2, 31.5, 6.9, 5.6, 5.2. HRMS(ESI): m/z: [M+H]<sup>+</sup> calculated for C<sub>22</sub>H<sub>31</sub>O<sub>2</sub>Si: 355.2088, Found: 355.2077.

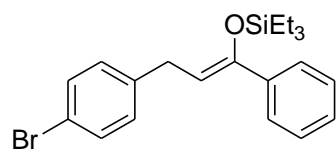

**3-(4-bromophenyl)-1-phenylprop-1-enyloxytriethylsilane (5c):** <sup>1</sup>H NMR (400 MHz, CDCl<sub>3</sub>) δ 7.37 (d, J = 7.6 Hz, 2H), 7.28 (d, J = 7.3 Hz, 2H), 7.18 (s, 3H), 7.02 (d, J = 7.6 Hz, 2H), 5.14 (s, 1H), 3.42 (d, J = 7.2 Hz, 2H), 0.83 (t, J = 7.8 Hz, 9H), 0.53 (t, J = 7.8 Hz, 6H). <sup>13</sup>C NMR (101 MHz, CDCl<sub>3</sub>) δ 150.8, 140.6, 139.4, 131.4, 130.2, 128.1, 127.9, 125.8, 119.6, 77.4, 77.1, 76.8, 31.7, 6.8, 6.5, 5.5. HRMS(ESI): m/z: [M+H]<sup>+</sup> calculated for C<sub>22</sub>H<sub>30</sub>BrO<sub>2</sub>Si: 433.1193, Found: 435.1175.



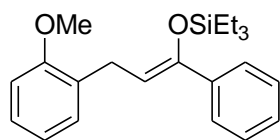

**3-(2-methoxyphenyl)-1-phenylprop-1-enyloxytriethylsilane**

**(5d):**  $^1\text{H}$  NMR (400 MHz,  $\text{CDCl}_3$ )  $\delta$  7.64 (d,  $J = 8.0$  Hz, 2H), 7.48 – 7.42 (m, 1H), 7.39 (d,  $J = 8.6$  Hz, 2H), 7.37 – 7.26 (m, 2H), 7.03 (t,  $J = 7.4$  Hz, 1H), 6.97 (d,  $J = 8.3$  Hz, 1H), 5.50 (t,  $J = 7.1$  Hz, 1H), 3.95 (s, 3H), 3.74 (d,  $J = 7.1$  Hz, 2H), 1.10 (t,  $J = 7.9$  Hz, 9H), 0.79 (q,  $J = 7.9$  Hz, 6H).  $^{13}\text{C}$  NMR (101 MHz,  $\text{CDCl}_3$ )  $\delta$  157.5, 150.1, 139.8, 129.6, 128.0, 127.5, 127.1, 125.8, 120.6, 110.3, 109.5, 77.5, 77.2, 76.8, 55.4, 26.4, 6.8, 5.6, 5.2.  $^{29}\text{Si}$  NMR (99 MHz,  $\text{CDCl}_3$ )  $\delta$  20.82, 20.13. HRMS(ESI):  $m/z$ :  $[\text{M}+\text{H}]^+$  calculated for  $\text{C}_{22}\text{H}_{31}\text{O}_2\text{Si}$ : 355.208, Found: 355.2077.

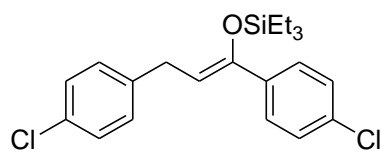

**1,3-bis(4-chlorophenyl)prop-1-enyloxytriethylsilane**

**(5e):**  $^1\text{H}$  NMR (400 MHz,  $\text{CDCl}_3$ )  $\delta$  7.39 (s, 2H), 7.27 (s, 2H), 7.23 (d,  $J = 8.8$  Hz, 2H), 7.16 (s, 2H), 5.23 (s, 1H), 3.52 (d,  $J = 7.2$  Hz, 2H), 0.93 (t,  $J = 7.9$  Hz, 9H), 0.63 (t,  $J = 7.9$  Hz, 6H).  $^{13}\text{C}$  NMR (101 MHz,  $\text{CDCl}_3$ )  $\delta$  149.7, 139.8, 137.9, 133.6, 129.7, 128.5, 128.3, 127.0, 109.6, 77.4, 77.0, 76.7, 31.6, 6.7, 5.5, 5.1.  $^{29}\text{Si}$  NMR (99 MHz,  $\text{CDCl}_3$ )  $\delta$  21.66. HRMS(ESI):  $m/z$ :  $[\text{M}+\text{H}]^+$  calculated for  $\text{C}_{21}\text{H}_{27}\text{Cl}_2\text{OSi}$ : 393.1203, Found: 393.1198.

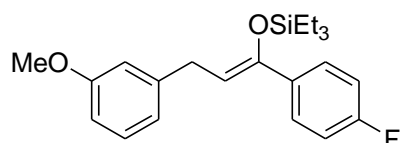

**1-(4-fluorophenyl)-3-(3-methoxyphenyl)prop-1-enyloxytriethylsilane**

**(5f):**  $^1\text{H}$  NMR (400 MHz,  $\text{CDCl}_3$ )  $\delta$  7.33 (dd,  $J = 8.8, 5.5$  Hz, 2H), 7.07 (t,  $J = 7.9$  Hz, 1H), 6.91 – 6.80 (m, 2H), 6.76 – 6.63 (m, 2H), 6.63 – 6.58 (m, 1H), 5.12 (dd,  $J = 9.9, 4.4$  Hz, 1H), 3.64 (s, 3H), 3.44 (d,  $J = 7.2$  Hz, 2H), 0.83 (t,  $J = 8.0$  Hz, 9H), 0.52 (dd,  $J = 15.6, 7.7$  Hz, 6H).  $^{13}\text{C}$  NMR (101 MHz,  $\text{CDCl}_3$ )  $\delta$  159.9, 149.4, 143.2, 129.4, 127.5 (d,  $J = 8.0$  Hz), 120.9, 115.0, 114.8, 114.3, 111.3, 77.5, 77.1, 76.8, 55.1, 32.4, 6.8, 5.5, 5.1.  $^{29}\text{Si}$  NMR (99 MHz,  $\text{CDCl}_3$ )  $\delta$  21.18, 20.33.  $^{19}\text{F}$  NMR (471 MHz,  $\text{CDCl}_3$ )  $\delta$  -113.26, -114.29. HRMS(ESI):  $m/z$ :  $[\text{M}+\text{Na}]^+$  calculated for  $\text{C}_{22}\text{H}_{29}\text{FNaO}_2\text{Si}$ : 395.1813, Found: 395.1803.

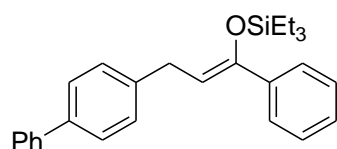

**3-([1,1'-biphenyl]-4-yl)-1-phenylprop-1-en-1-yloxy)triethylsilane (5g):**

$^1\text{H}$  NMR (400 MHz,  $\text{CDCl}_3$ )  $\delta$  7.82 (d,  $J = 8.0$  Hz, 2H), 7.78 (d,  $J = 7.9$  Hz, 4H), 7.62 (dd,  $J = 18.7$ , 8.1 Hz, 4H), 7.56 – 7.44 (m, 4H), 5.61 (dt,  $J = 7.0$ , 3.5 Hz, 1H), 3.91 (d,  $J = 7.1$  Hz, 2H), 1.24 (t,  $J = 8.0$  Hz, 9H), 0.93 (q,  $J = 7.9$  Hz, 6H).  $^{13}\text{C}$  NMR (101 MHz,  $\text{CDCl}_3$ )  $\delta$  150.6, 141.4, 140.9, 139.7, 139.1, 129.0 (d,  $J = 15.5$  Hz), 128.2, 127.9, 127.3 (d,  $J = 15.4$  Hz), 126.0, 109.8, 77.6, 77.3, 77.0, 32.2, 7.0, 5.8, 5.4. HRMS(ESI):  $m/z$ :  $[\text{M}+\text{K}]^+$  calculated for  $\text{C}_{27}\text{H}_{32}\text{KOSi}$ : 439.2080, Found: 439.2084.

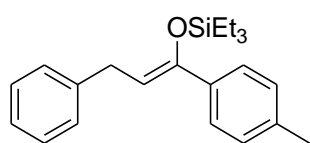

**3-phenyl-1-p-tolylprop-1-enyloxy)triethylsilane (5h):**

$^1\text{H}$  NMR (400 MHz,  $\text{CDCl}_3$ )  $\delta$  7.66 – 7.58 (m, 2H), 7.58 – 7.49 (m, 4H), 7.46 (dd,  $J = 12.1$ , 5.4 Hz, 2H), 7.33 (d,  $J = 7.4$  Hz, 1H), 5.62 (dd,  $J = 7.1$ , 5.5 Hz, 1H), 3.91 (d,  $J = 6.9$  Hz, 2H), 2.61 (s, 3H), 1.27 (dd,  $J = 8.5$ , 7.2 Hz, 9H), 1.02 – 0.90 (m, 6H).  $^{13}\text{C}$  NMR (101 MHz,  $\text{CDCl}_3$ )  $\delta$  150.6, 141.9, 137.6, 128.6 (d,  $J = 6.5$  Hz), 128.2, 126.7, 126.0, 123.2, 109.7, 77.6, 77.3, 77.0, 32.6, 21.6, 7.0, 5.8, 5.4. HRMS(ESI):  $m/z$ :  $[\text{M}+\text{H}]^+$  calculated for  $\text{C}_{22}\text{H}_{31}\text{OSi}$ : 339.2139, Found: 339.2143.

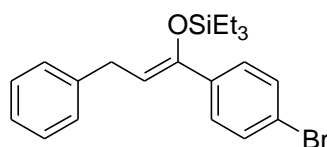

**1-(4-bromophenyl)-3-phenylprop-1-enyloxy)triethylsilane (5i):**

$^1\text{H}$  NMR (400 MHz,  $\text{CDCl}_3$ )  $\delta$  7.31 (d,  $J = 8.5$  Hz, 2H), 7.25 (d,  $J = 8.5$  Hz, 2H), 7.21 – 7.16 (m, 2H), 7.14 (d,  $J = 6.8$  Hz, 2H), 7.08 (d,  $J = 6.8$  Hz, 1H), 5.21 (t,  $J = 7.2$  Hz, 1H), 3.47 (d,  $J = 7.2$  Hz, 2H), 0.85 (t,  $J = 7.9$  Hz, 9H), 0.54 (q,  $J = 8.0$  Hz, 6H).  $^{13}\text{C}$  NMR (101 MHz,  $\text{CDCl}_3$ )  $\delta$  149.3, 141.3, 138.5, 131.2, 128.5 (d,  $J = 3.1$  Hz), 127.3, 126.0, 110.5, 77.4, 77.1, 76.8, 32.4, 6.8, 5.5, 5.1.  $^{29}\text{Si}$  NMR (99 MHz,  $\text{CDCl}_3$ )  $\delta$  21.52. HRMS(ESI):  $m/z$ :  $[\text{M}+\text{H}]^+$  calculated for  $\text{C}_{21}\text{H}_{27}\text{BrNSi}$ : 400.1091, Found: 403.1059.

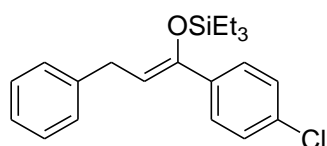

**1-(4-chlorophenyl)-3-phenylprop-1-enyloxy)triethylsilane (5j):**

$^1\text{H}$  NMR (400 MHz,  $\text{CDCl}_3$ )  $^1\text{H}$  NMR (400 MHz,

CDCl<sub>3</sub>) δ 7.60 – 7.50 (m, 2H), 7.42 (dd, J = 14.6, 7.8 Hz, 5H), 7.39 – 7.27 (m, 2H), 5.91 – 5.00 (m, 1H), 3.75 (d, J = 7.1 Hz, 2H), 1.12 (t, J = 7.9 Hz, 9H), 0.81 (dd, J = 15.5, 7.7 Hz, 6H). <sup>13</sup>C NMR (101 MHz, CDCl<sub>3</sub>) δ 149.3, 141.4, 138.1, 133.5, 129.7, 128.6 – 128.2 (m), 127.1, 126.0, 110.4, 77.5, 77.2, 76.9, 32.5, 6.8, 5.6, 5.2. <sup>29</sup>SiNMR (99 MHz, CDCl<sub>3</sub>) δ 21.38. HRMS(ESI): m/z: [M+H]<sup>+</sup> calculated for C<sub>21</sub>H<sub>28</sub>ClOSi: 359.1592, Found: 359.1582.

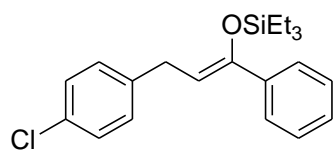

**3-(4-chlorophenyl)-1-phenylprop-1-enyloxytriethylsilane (5k):** <sup>1</sup>H NMR (400 MHz, CDCl<sub>3</sub>) δ 7.49 – 7.38 (m, 2H), 7.28 (t, J = 7.1 Hz, 2H), 7.23 (dd, J = 7.6, 4.7 Hz, 3H), 7.16 (d, J = 8.5 Hz, 2H), 5.24 (t, J = 7.2 Hz, 1H), 3.53 (d, J = 7.2 Hz, 2H), 0.93 (t, J = 7.9 Hz, 9H), 0.61 (q, J = 7.9 Hz, 6H). <sup>13</sup>C NMR (101 MHz, CDCl<sub>3</sub>) δ 150.8, 140.1, 139.4, 129.8, 128.5, 128.1, 127.9, 125.8, 109.0, 77.4, 77.1, 76.8, 6.8, 5.5, 5.2. HRMS(ESI): m/z: [M+H]<sup>+</sup> calculated for C<sub>21</sub>H<sub>28</sub>ClOSi: 359.1592, Found: 359.1582.

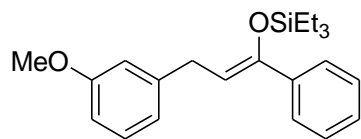

**3-(3-methoxyphenyl)-1-phenylprop-1-enyloxytriethylsilane (5L):** <sup>1</sup>H NMR (400 MHz, CDCl<sub>3</sub>) δ 7.63 (d, J = 6.7 Hz, 2H), 7.43 (s, 1H), 7.42 – 7.35 (m, 2H), 7.34 (d, J = 8.6 Hz, 1H), 6.99 (d, J = 13.9 Hz, 2H), 6.86 (d, J = 8.0 Hz, 1H), 5.46 (t, J = 6.9 Hz, 1H), 3.89 (s, 3H), 3.72 (d, J = 6.8 Hz, 2H), 1.09 (t, J = 7.8 Hz, 9H), 0.78 (q, J = 7.5 Hz, 6H). <sup>13</sup>C NMR (101 MHz, CDCl<sub>3</sub>) δ 159.9, 150.4, 143.3, 139.6, 129.4, 128.1, 125.8, 120.9, 114.3, 111.3, 109.7, 77.4, 77.5, 76.8, 55.1, 32.4, 6.8, 5.6. HRMS(ESI): m/z: [M+H]<sup>+</sup> calculated for C<sub>22</sub>H<sub>31</sub>O<sub>2</sub>Si: 355.2088, Found: 355.2097.

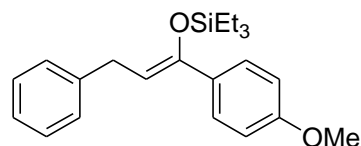

**1-(4-methoxyphenyl)-3-phenylprop-1-enyloxytriethylsilane (5m):** <sup>1</sup>H NMR (400 MHz, CDCl<sub>3</sub>) δ 7.31 (d, J = 8.6 Hz, 2H), 7.20 – 7.10 (m, 4H), 7.10 – 7.03 (m, 1H), 6.72 (d, J = 8.6 Hz, 2H), 5.11 (t, J = 7.1 Hz, 1H), 3.67 (s, 3H), 3.47 (d, J = 7.1 Hz, 2H), 0.85 (t, J = 8.0 Hz, 9H), 0.54 (q, J = 7.9 Hz, 6H). <sup>13</sup>C NMR (101 MHz, CDCl<sub>3</sub>) δ 159.4, 150.0, 141.9, 132.3, 128.4 (d, J = 7.5 Hz), 127.1, 125.8, 113.4, 108.3, 77.4,

77.1, 76.8, 55.2, 32.3, 6.8, 5.5, 5.2. HRMS(ESI):  $m/z$ :  $[M+H]^+$  calculated for  $C_{22}H_{31}O_2Si$ : 355.2088, Found: 355.2077.

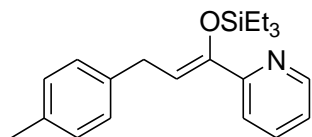

**2-(3-(p-tolyl)-1-((triethylsilyloxy)prop-1-en-1-yl)pyridine (5n):**  $^1H$  NMR (400 MHz,  $CDCl_3$ )  $\delta$  8.39 – 8.34 (m, 1H), 7.44 (td,  $J = 7.8, 1.8$  Hz, 1H), 7.37 (d,  $J = 8.0$  Hz, 1H), 7.05 (d,  $J = 8.0$  Hz, 2H), 6.95 (d,  $J = 8.1$  Hz, 3H), 5.93 (t,  $J = 7.4$  Hz, 1H), 3.49 (d,  $J = 7.4$  Hz, 2H), 2.17 (s, 3H), 0.87 (t,  $J = 7.9$  Hz, 9H), 0.61 (q,  $J = 7.9$  Hz, 6H).  $^{13}C$  NMR (101 MHz,  $CDCl_3$ )  $\delta$  156.2, 148.8, 138.1, 136.1, 135.3, 129.1, 128.5, 122.2, 119.4, 112.5, 77.6, 77.2, 76.9, 32.0, 21.0, 6.9, 5.8. HRMS(ESI):  $m/z$ :  $[M+Na]^+$  calculated for  $C_{21}H_{29}NNaOSi$ : 362.1916, Found: 362.1920.

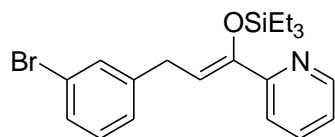

**2-(3-(3-bromophenyl)-1-((triethylsilyloxy)prop-1-en-1-yl)pyridine (5o):**  $^1H$  NMR (400 MHz,  $CDCl_3$ )  $\delta$  8.45 (ddd,  $J = 4.8, 1.7, 0.9$  Hz, 1H), 7.57 (td,  $J = 7.8, 1.8$  Hz, 1H), 7.43 (d,  $J = 8.0$  Hz, 1H), 7.34 (s, 1H), 7.23 (d,  $J = 7.8$  Hz, 1H), 7.12 (d,  $J = 7.7$  Hz, 1H), 7.07 (d,  $J = 7.7$  Hz, 2H), 5.90 (t,  $J = 7.4$  Hz, 1H), 3.51 (d,  $J = 7.4$  Hz, 2H), 0.90 (t,  $J = 7.9$  Hz, 9H), 0.68 – 0.59 (m, 6H).  $^{13}C$  NMR (101 MHz,  $CDCl_3$ )  $\delta$  155.8, 149.4, 148.8, 143.5, 136.2, 131.6, 129.9, 129.0, 127.2, 122.3, 119.5, 110.9, 77.3, 77.0, 76.70, 31.9, 6.8, 5.7. HRMS(ESI):  $m/z$ :  $[M+Na]^+$  calculated for  $C_{20}H_{26}BrNNaOSi$ : 426.0865, Found: 426.0862.

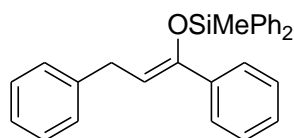

**1,3-diphenylprop-1-en-1-yloxy(methyl)diphenylsilane (5p):**  $^1H$  NMR (400 MHz,  $CDCl_3$ )  $\delta$  7.49 (dd,  $J = 7.8, 1.3$  Hz, 5H), 7.34 – 7.27 (m, 5H), 7.23 (t,  $J = 7.1$  Hz, 4H), 7.09 (dd,  $J = 8.5, 5.3$  Hz, 4H), 6.94 (d,  $J = 7.2$  Hz, 2H), 5.25 (t,  $J = 7.2$  Hz, 1H), 3.27 (d,  $J = 7.2$  Hz, 2H), 0.46 (d,  $J = 10.0$  Hz, 3H).  $^{13}C$  NMR (101 MHz,  $CDCl_3$ )  $\delta$  151.7, 143.5, 140.8, 137.7, 136.6 (d,  $J = 10.8$  Hz), 136.6 (d,  $J = 10.8$  Hz), 136.2, 132.2, 131.9, 130.5 (d,  $J = 11.1$  Hz), 130.0 (dd,  $J = 16.7, 13.3$  Hz), 128.2, 127.9, 79.5, 79.2, 78.9, 34.6, 20.6, -0.0. HRMS(ESI):  $m/z$ :  $[M+Na]^+$  calculated for  $C_{28}H_{26}NaOSi$ : 429.1650, Found: 429.1652.

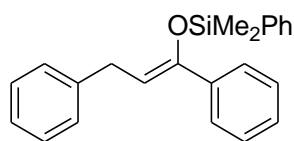

**1,3-diphenylprop-1-enyloxydimethyl(phenyl)silane (5q):**

$^1\text{H}$  NMR (400 MHz,  $\text{CDCl}_3$ )  $\delta$  7.59 – 7.55 (m, 2H), 7.43 (d,  $J$  = 1.5 Hz, 2H), 7.38 (d,  $J$  = 7.2 Hz, 1H), 7.35 (d,  $J$  = 7.3 Hz, 2H), 7.26 (s, 1H), 7.23 (dd,  $J$  = 4.2, 3.3 Hz, 4H), 7.17 (d,  $J$  = 7.2 Hz, 1H), 7.15 – 7.11 (m, 2H), 5.37 (t,  $J$  = 7.2 Hz, 1H), 3.45 (d,  $J$  = 7.2 Hz, 2H), 0.38 (s, 6H).  $^{13}\text{C}$  NMR (101 MHz,  $\text{CDCl}_3$ )  $\delta$  150.5, 142.3, 139.7, 138.1, 134.3, 133.9, 130.7, 129.2 (d,  $J$  = 7.9 Hz), 128.9, 128.5 (d,  $J$  = 16.4 Hz), 128.5, 126.6, 111.1, 78.2, 77.9, 77.6, 33.2, 30.6, 0.0. HRMS(ESI):  $m/z$ :  $[\text{M}+\text{Na}]^+$  calculated for  $\text{C}_{23}\text{H}_{24}\text{NaOSi}$ : 401.0682, Found: 401.0680.

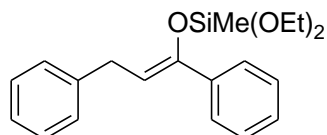

**1,3-diphenylprop-1-enyloxydiethoxy(methyl)silane**

**(5r):**  $^1\text{H}$  NMR (400 MHz,  $\text{CDCl}_3$ )  $\delta$  7.83 (d,  $J$  = 7.9 Hz, 1H), 7.42 (d,  $J$  = 7.6 Hz, 2H), 7.32 (t,  $J$  = 7.6 Hz, 1H), 7.15

(d,  $J$  = 4.1 Hz, 4H), 7.12 (d,  $J$  = 5.8 Hz, 2H), 5.33 (t,  $J$  = 7.2 Hz, 1H), 3.68 (d,  $J$  = 7.0 Hz, 4H), 3.50 (dd,  $J$  = 15.5, 7.2 Hz, 2H), 1.04 (t,  $J$  = 7.0 Hz, 6H), -0.00 (s, 3H).  $^{13}\text{C}$  NMR (101 MHz,  $\text{CDCl}_3$ )  $\delta$  148.2, 141.4, 128.5, 128.4, 128.1, 127.7, 125.8, 125.4, 110.2, 77.3, 77.0, 76.7, 58.7, 32.2, 29.7, 18.1, -6.5. HRMS(ESI):  $m/z$ :  $[\text{M}+\text{Na}]^+$  calculated for  $\text{C}_{20}\text{H}_{26}\text{NaO}_3\text{Si}$ : 365.1543, Found: 365.1543.

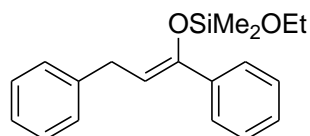

**1,3-diphenylprop-1-enyloxy(ethoxy)dimethylsilane (5s):**

$^1\text{H}$  NMR (400 MHz,  $\text{CDCl}_3$ )  $\delta$  7.80 – 7.75 (m, 1H), 7.39 – 7.33 (m, 2H), 7.26 (t,  $J$  = 7.6 Hz, 1H), 7.12 – 7.10 (m, 4H), 7.08 (d,  $J$  = 7.1 Hz, 2H), 5.29 (t,  $J$  = 7.2 Hz, 1H), 3.57 (q,  $J$  = 7.0 Hz, 2H), 3.45 (d,  $J$  = 7.2 Hz, 2H), 0.99 (t,  $J$  = 7.0 Hz, 3H), -0.00 (s, 6H).  $^{13}\text{C}$  NMR (101 MHz,  $\text{CDCl}_3$ )  $\delta$  201.5, 151.3, 143.7, 140.9, 130.8 (dd,  $J$  = 14.3, 5.8 Hz), 130.4 (d,  $J$  = 6.7 Hz), 130.0, 127.8, 112.3, 79.7, 79.4, 79.1, 60.9, 34.6, 32.5, 20.6, 0.0. HRMS(ESI):  $m/z$ :  $[\text{M}+\text{Na}]^+$  calculated for  $\text{C}_{19}\text{H}_{24}\text{NaO}_2\text{Si}$ : 335.1443, Found: 335.1442.

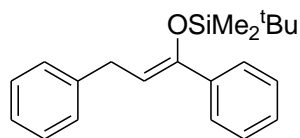

**1,3-diphenylprop-1-en-1-yl dimethylsilyl ether (5t)**

**(5t):**  $^1\text{H}$  NMR (400 MHz,  $\text{CDCl}_3$ )  $\delta$  7.48 (d,  $J = 7.1$  Hz, 2H), 7.27 (d,  $J = 4.3$  Hz, 5H), 7.22 (dd,  $J = 14.5, 7.4$  Hz, 2H), 7.17 (dd,  $J = 8.8, 4.5$  Hz, 1H), 5.31 (t,  $J = 7.2$  Hz, 1H), 3.59 (d,  $J = 7.2$  Hz, 2H), 1.02 (s, 7H), 0.00 (s, 6H).  $^{13}\text{C}$  NMR (101 MHz,  $\text{CDCl}_3$ )  $\delta$  150.2, 141.7, 139.7, 128.6 (d,  $J = 6.4$  Hz), 128.1, 127.8, 126.2, 126.0, 110.5, 77.5, 77.2, 76.9, 32.5, 26.1, 18.5, -3.7. HRMS(ESI):  $m/z$ :  $[\text{M}+\text{Na}]^+$  calculated for  $\text{C}_{20}\text{H}_{26}\text{NaOSi}$ : 333.1654, Found: 333.1652.

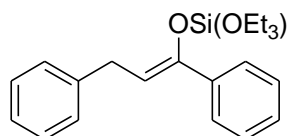

**1,3-diphenylprop-1-en-1-yl triethoxysilane (5u)**

**(5u):**  $^1\text{H}$  NMR (400 MHz,  $\text{CDCl}_3$ )  $\delta$  7.49 (d,  $J = 7.4$  Hz, 2H), 7.23 – 7.20 (m, 6H), 7.18 (d,  $J = 6.8$  Hz, 2H), 5.39 (t,  $J = 7.2$  Hz, 1H), 3.75 (q,  $J = 7.0$  Hz, 6H), 3.60 (d,  $J = 7.2$  Hz, 2H), 1.09 (t,  $J = 7.0$  Hz, 9H).  $^{13}\text{C}$  NMR (101 MHz,  $\text{CDCl}_3$ )  $\delta$  147.8, 141.5, 138.0, 128.6, 128.3, 128.0, 127.7, 125.4, 110.4, 77.4, 77.0, 76.7, 59.5, 32.1, 18.0. HRMS(ESI):  $m/z$ :  $[\text{M}+\text{Na}]^+$  calculated for  $\text{C}_{21}\text{H}_{29}\text{NaO}_4\text{Si}$ : 395.1655, Found: 395.1650.

#### 4. General Procedure for the conjugate addition of silyl enolate to ethyl acrylate:

To a solution of 1,3-diphenylprop-1-en-1-yl triethylsilane (1.0 mmol, 1.0 equiv.) in anhydrous THF (1 mL), tetrabutylammonium fluoride (1M in THF, 0.1 mL, 10 mol%) was added dropwise under argon atmosphere, followed by addition of ethyl acrylate (0.16 mL, 1.0 mmol, 1.0 equiv.). The resulting solution was stirred for 4 h at 60 °C. The reaction was detected with TLC, and the mixture was cooled to room temperature, filtration under diminished pressure. The organic layer was diluted with 10 mL EtOAc and water layer was extracted with EtOAc (5 mL  $\times$  2). The combined organic layer was dried over  $\text{Na}_2\text{SO}_4$  and concentrated. After purification by silica gel flash chromatography (using petroleum: EtOAc = 4:1) to give moderate with good

yield.

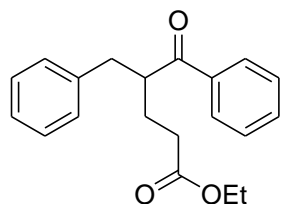

**ethyl-4-benzyl-5-oxo-5-phenylpentanoate (7a):**  $^1\text{H NMR}$  (400 MHz,  $\text{CDCl}_3$ )  $\delta$  7.89 – 7.84 (m, 2H), 7.64 – 7.57 (m, 1H), 7.51 (t,  $J = 7.4$  Hz, 1H), 7.40 (t,  $J = 7.7$  Hz, 2H), 7.20 (d,  $J = 7.2$  Hz, 2H), 7.15 (d,  $J = 6.9$  Hz, 2H), 4.05 (q,  $J = 7.1$  Hz, 2H), 3.89 – 3.80 (m, 1H), 3.10 (dd,  $J = 13.7, 7.3$  Hz, 1H), 2.75 (dd,  $J = 13.7, 6.8$  Hz, 1H), 2.32 (dd,  $J = 8.4, 6.1$  Hz, 1H), 2.18 (ddd,  $J = 30.1, 11.0, 6.7$  Hz, 2H), 1.90 (dd,  $J = 10.7, 3.9$  Hz, 1H), 1.16 (t,  $J = 7.1$  Hz, 3H).  $^{13}\text{C NMR}$  (101 MHz,  $\text{CDCl}_3$ )  $\delta$  203.2, 173.1, 139.3, 134.0, 133.1, 129.0, 128.6 (d,  $J = 19.0$  Hz), 128.3, 127.9, 126.4, 77.4, 77.1, 76.8, 60.4, 47.0, 38.4, 31.8, 27.0, 14.2. HRMS(ESI):  $m/z$ :  $[\text{M}+\text{Na}]^+$  calculated for  $\text{C}_{20}\text{H}_{22}\text{NaO}_3$ : 333.1461, Found: 333.1449.

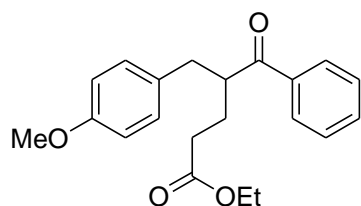

**ethyl-4-(4-methoxybenzyl)-5-oxo-5-phenylpentanoate (7b):**  $^1\text{H NMR}$  (400 MHz,  $\text{CDCl}_3$ )  $\delta$  7.88 (d,  $J = 7.3$  Hz, 1H), 7.50 (t,  $J = 7.4$  Hz, 1H), 7.44 – 7.20 (m, 2H), 7.07 (d,  $J = 8.5$  Hz, 1H), 6.86 – 6.67 (m, 2H), 4.05 (q,  $J = 7.1$  Hz, 2H), 3.82 (dd,  $J = 10.0, 4.6$  Hz, 1H), 3.70 (s, 3H), 2.99 (ddd,  $J = 16.4, 13.3, 5.5$  Hz, 1H), 2.70 (dd,  $J = 13.8, 6.7$  Hz, 1H), 2.32 (dd,  $J = 8.9, 6.7$  Hz, 1H), 2.22 (dd,  $J = 15.8, 8.4$  Hz, 1H), 2.16 – 1.95 (m, 1H), 1.93 – 1.79 (m, 1H), 1.21 (t,  $J = 7.1$  Hz, 1H), 1.16 (t,  $J = 7.1$  Hz, 2H), 0.87 (t,  $J = 7.2$  Hz, 1H).  $^{13}\text{C NMR}$  (101 MHz,  $\text{CDCl}_3$ )  $\delta$  203.2, 173.0, 158.1, 137.2, 133.0, 131.2, 129.9, 128.6, 128.2, 113.9, 77.5, 77.2, 76.9, 60.3, 55.1, 47.2, 37.5, 31.7, 26.9, 14.1. HRMS(ESI) :  $m/z$ :  $[\text{M}+\text{Na}]^+$  calculated for  $\text{C}_{21}\text{H}_{24}\text{NaO}_4$ : 363.1567, Found: 363.1555.

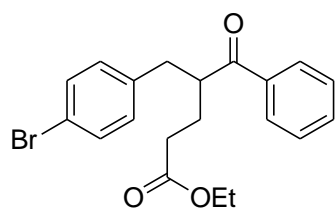

**ethyl-4-(4-bromobenzyl)-5-oxo-5-phenylpentanoate (7c):**  $^1\text{H NMR}$  (400 MHz,  $\text{CDCl}_3$ )  $\delta$  7.81 (d,  $J = 7.5$  Hz, 2H), 7.48 – 7.41 (m, 1H), 7.35 (t,  $J = 6.2$  Hz, 2H), 7.26 (d,  $J = 8.2$  Hz, 2H), 7.12 (dd,  $J = 17.9, 7.4$  Hz, 1H), 6.97 (d,  $J = 8.2$  Hz, 1H), 4.00 (dd,  $J = 7.1, 4.3$  Hz, 2H), 3.85 – 3.73 (m, 1H), 3.00 (dd,  $J = 13.7,$

7.7 Hz, 1H), 2.66 (dd,  $J = 13.9, 6.3$  Hz, 1H), 2.34 – 2.23 (m, 1H), 2.23 – 2.11 (m, 1H), 2.11 – 1.98 (m, 1H), 1.82 (dd,  $J = 10.6, 4.4$  Hz, 1H), 1.11 (dd,  $J = 9.2, 5.1$  Hz, 3H).  $^{13}\text{C}$  NMR (101 MHz,  $\text{CDCl}_3$ )  $\delta$  201.7, 171.9, 137.4, 132.3, 130.6, 129.8, 128.0, 127.8, 127.3, 119.3, 76.5, 76.2, 75.9, 59.5, 45.7, 36.6, 30.6, 26.2, 13.2. HRMS(ESI) :  $m/z$ :  $[\text{M}+\text{Na}]^+$  calculated for  $\text{C}_{20}\text{H}_{21}\text{BrNaO}_3$ : 411.0566, Found: 411.0556.

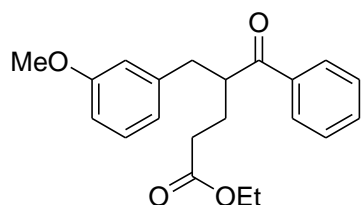

**ethyl-4-(3-methoxybenzyl)-5-oxo-5-phenylpentanoate**

**e (7d):**  $^1\text{H}$  NMR (400 MHz,  $\text{CDCl}_3$ )  $\delta$  7.88 (d,  $J = 7.4$  Hz, 1H), 7.51 (t,  $J = 7.4$  Hz, 1H), 7.40 (t,  $J = 7.6$  Hz, 2H), 7.13 (t,  $J = 7.8$  Hz, 1H), 6.75 (d,  $J = 7.6$  Hz, 1H),

6.72 – 6.62 (m, 2H), 4.05 (q,  $J = 7.1$  Hz, 2H), 3.85 (dd,  $J = 8.8, 4.3$  Hz, 1H), 3.71 (s, 3H), 3.01 (ddd,  $J = 16.4, 13.2, 5.5$  Hz, 1H), 2.80 – 2.68 (m, 1H), 2.32 (dd,  $J = 8.4, 6.4$  Hz, 1H), 2.26 – 2.17 (m, 1H), 2.16 – 2.07 (m, 1H), 1.94 – 1.86 (m, 1H), 1.21 (t,  $J = 7.1$  Hz, 1H), 1.17 (t,  $J = 7.2$  Hz, 2H), 0.87 (t,  $J = 7.7$  Hz, 1H).  $^{13}\text{C}$  NMR (101 MHz,  $\text{CDCl}_3$ )  $\delta$  203.0, 173.0, 159.6, 140.8, 137.2, 133.1, 129.4, 128.6, 128.2, 121.3, 114.8, 111.7, 77.5, 77.1, 76.8, 60.3, 55.1, 46.8, 38.4, 31.7, 27.0, 14.1. HRMS(ESI):  $m/z$ :  $[\text{M}+\text{Na}]^+$  calculated for  $\text{C}_{21}\text{H}_{24}\text{NaO}_4$ : 363.1567, Found: 363.1559.

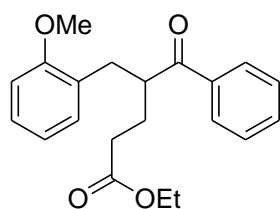

**ethyl-4-(2-methoxybenzyl)-5-oxo-5-phenylpentanoate (7e):**

$^1\text{H}$  NMR (400 MHz,  $\text{CDCl}_3$ )  $\delta$  7.95 (d,  $J = 7.4$  Hz, 2H), 7.49 (t,  $J = 7.3$  Hz, 1H), 7.39 (t,  $J = 7.6$  Hz, 2H), 7.12 (dd,  $J = 11.1, 4.5$  Hz, 1H), 6.98 (dd,  $J = 72.1, 7.2$  Hz, 1H), 6.82 – 6.75 (m,

2H), 4.03 (q,  $J = 7.1$  Hz, 2H), 3.79 (s, 3H), 3.61 (d,  $J = 7.7$  Hz, 1H), 2.99 (ddd,  $J = 16.3, 13.0, 4.9$  Hz, 1H), 2.72 (dd,  $J = 13.3, 7.5$  Hz, 1H), 2.34 (dd,  $J = 12.2, 6.6$  Hz, 1H), 2.25 – 2.10 (m, 2H), 1.89 – 1.77 (m, 1H), 1.20 (t,  $J = 7.1$  Hz, 1H), 1.15 (t,  $J = 7.1$  Hz, 3H), 1.07 (t,  $J = 7.1$  Hz, 1H).  $^{13}\text{C}$  NMR (101 MHz,  $\text{CDCl}_3$ )  $\delta$  203.3, 173.1, 157.4, 137.2, 132.9, 131.2, 128.5, 128.3, 127.8, 127.5, 120.4, 110.2, 77.5, 77.2, 76.9, 60.2, 55.1, 45.0, 34.0, 32.0, 26.6, 14.1. HRMS(ESI):  $m/z$ :  $[\text{M}+\text{Na}]^+$  calculated for  $\text{C}_{21}\text{H}_{24}\text{NaO}_4$ : 363.1567, Found: 363.1559.



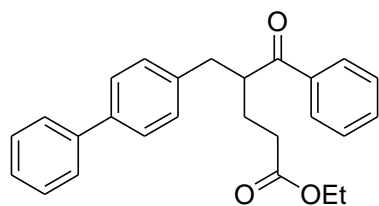

**ethyl-4-(4-benzylbenzyl)-5-oxo-5-phenylpentanoate**

**(7f):**  $^1\text{H}$  NMR (400 MHz,  $\text{CDCl}_3$ )  $\delta$  7.90 (d,  $J = 7.6$  Hz, 2H), 7.53 (d,  $J = 7.5$  Hz, 3H), 7.48 – 7.37 (m, 6H), 7.31 (t,  $J = 7.3$  Hz, 1H), 7.26 – 7.21 (m, 2H), 4.07 (q,  $J = 7.1$  Hz, 2H), 3.15 (dd,  $J = 13.7, 7.3$  Hz, 1H), 2.80 (dd,  $J = 13.7, 6.7$  Hz, 1H), 2.36 (dd,  $J = 8.3, 6.3$  Hz, 1H), 2.25 (dd,  $J = 15.8, 8.3$  Hz, 1H), 2.19 – 2.09 (m, 1H), 1.98 – 1.87 (m, 1H), 1.18 (t,  $J = 7.1$  Hz, 3H).  $^{13}\text{C}$  NMR (101 MHz,  $\text{CDCl}_3$ )  $\delta$  203.2, 172.9, 140.9, 139.3, 138.4, 137.3, 133.8, 129.0, 128.8, 128.7, 128.4, 127.2, 127.1, 127.0, 77.6, 77.2, 76.9, 60.3, 47.0, 38.4, 31.7, 21.3, 14.2. HRMS(ESI):  $m/z$ :  $[\text{M}+\text{Na}]^+$  calculated for  $\text{C}_{26}\text{H}_{26}\text{NaO}_3$ : 409.1774, Found: 409.1764.

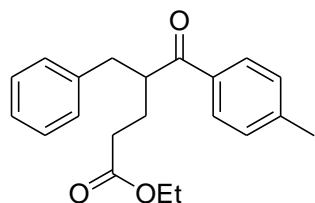

**ethyl-4-benzyl-5-oxo-5-p-tolylpentanoate (7g):**  $^1\text{H}$  NMR

(400 MHz,  $\text{CDCl}_3$ )  $\delta$  7.56 (d,  $J = 6.8$  Hz, 2H), 7.20 – 7.12 (m, 2H), 7.12 – 7.06 (m, 2H), 7.04 (d,  $J = 6.8$  Hz, 2H), 7.00 (t,  $J = 7.1$  Hz, 1H), 3.93 (q,  $J = 7.1$  Hz, 2H), 3.73 (dd,  $J = 7.5, 5.6$  Hz, 1H), 2.98 (dd,  $J = 13.7, 7.4$  Hz, 1H), 2.64 (dd,  $J = 13.7, 6.7$  Hz, 1H), 2.22 (s, 3H), 2.21 – 2.04 (m, 2H), 2.04 – 1.95 (m, 1H), 1.78 (dd,  $J = 6.6, 5.0$  Hz, 1H), 1.04 (t,  $J = 7.1$  Hz, 3H), 0.99 (t,  $J = 7.1$  Hz, 1H), 0.83 (t,  $J = 7.9$  Hz, 1H), 0.74 (t,  $J = 7.1$  Hz, 1H).  $^{13}\text{C}$  NMR (101 MHz,  $\text{CDCl}_3$ )  $\delta$  203.2, 172.9, 139.4, 138.3, 133.8, 129.0, 128.8, 128.5 (d,  $J = 7.4$  Hz), 126.3, 125.5, 77.6, 77.2, 76.9, 60.3, 47.0, 38.4, 31.7, 27.1, 21.3, 14.2. HRMS(ESI):  $m/z$ :  $[\text{M}+\text{Na}]^+$  calculated for  $\text{C}_{21}\text{H}_{24}\text{NaO}_3$ : 347.1618, Found: 347.1615.

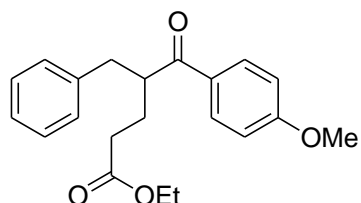

**ethyl-4-benzyl-5-(4-methoxyphenyl)-5-oxopentanoate**

**(7h):**  $^1\text{H}$  NMR (400 MHz,  $\text{CDCl}_3$ )  $\delta$  7.87 (d,  $J = 8.9$  Hz, 2H), 7.23 (dd,  $J = 15.3, 7.9$  Hz, 2H), 7.17 – 7.11 (m, 3H), 6.88 (d,  $J = 8.9$  Hz, 2H), 4.06 (q,  $J = 7.1$  Hz, 2H), 3.84 (s, 3H), 3.82 – 3.77 (m, 1H), 3.09 (dd,  $J = 13.7, 7.4$  Hz, 1H), 2.75 (dd,  $J = 13.7, 6.8$  Hz, 1H), 2.31 (dd,  $J = 8.4, 6.1$  Hz, 1H), 2.25 – 2.15 (m, 1H), 2.14 – 2.05 (m, 1H), 1.92 – 1.83 (m, 1H), 1.18 (t,  $J = 7.1$  Hz, 3H), 0.94 (t,  $J = 7.1$  Hz, 1H).  $^{13}\text{C}$  NMR (101

MHz, CDCl<sub>3</sub>)  $\delta$  201.5, 173.1, 163.6, 139.5, 130.6, 130.3, 129.0, 128.4, 126.3, 113.8, 77.4, 77.0, 76.7, 60.3, 55.4, 46.5, 38.5, 31.8, 27.2, 14.12. HRMS(ESI): m/z: [M+Na]<sup>+</sup> calculated for C<sub>21</sub>H<sub>24</sub>NaO<sub>4</sub>: 363.1567, Found: 363.1560.

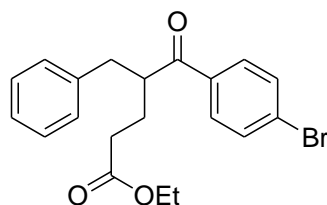

**ethyl-4-benzyl-5-(4-bromophenyl)-5-oxopentanoate**

**(7i):** <sup>1</sup>H NMR (400 MHz, CDCl<sub>3</sub>)  $\delta$  7.62 (d, J = 8.6 Hz, 2H), 7.44 (d, J = 8.6 Hz, 2H), 7.16 – 7.08 (m, 2H), 7.05 (dd, J = 7.1, 4.9 Hz, 3H), 3.98 (q, J = 7.1 Hz, 2H), 3.75 –

3.65 (m, 1H), 2.98 (dd, J = 13.7, 7.7 Hz, 1H), 2.68 (dd, J = 13.7, 6.4 Hz, 1H), 2.32 – 2.20 (m, 1H), 2.17 – 1.98 (m, 2H), 1.85 – 1.75 (m, 1H), 1.10 (t, J = 7.1 Hz, 3H). <sup>13</sup>C NMR (101 MHz, CDCl<sub>3</sub>)  $\delta$  202.2, 172.9, 139.0, 136.0, 131.9, 129.8, 128.9, 128.5, 128.3, 126.4, 77.4, 77.1, 76.8, 60.4, 47.0, 38.4, 31.6, 27.1, 14.2. HRMS(ESI): m/z: [M+Na]<sup>+</sup> calculated for C<sub>20</sub>H<sub>21</sub>BrNaO<sub>3</sub>: 414.0884, Found: 414.0848.

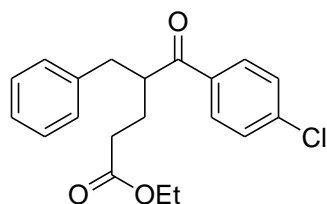

**ethyl-4-benzyl-5-(4-chlorophenyl)-5-oxopentanoate (7j):**

<sup>1</sup>H NMR (400 MHz, CDCl<sub>3</sub>)  $\delta$  7.70 (d, J = 8.6 Hz, 2H), 7.26 (d, J = 8.6 Hz, 2H), 7.14 – 7.08 (m, 2H), 7.07 – 7.00 (m, 3H), 3.97 (q, J = 7.1 Hz, 2H), 3.75 – 3.65 (m, 1H),

2.98 (dd, J = 13.7, 7.7 Hz, 1H), 2.68 (dd, J = 13.7, 6.4 Hz, 1H), 2.31 – 2.20 (m, 1H), 2.17 – 1.98 (m, 2H), 1.85 – 1.75 (m, 1H), 1.09 (t, J = 7.1 Hz, 3H), 1.01 (t, J = 7.1 Hz, 1H), 0.83 (t, J = 7.1 Hz, 1H). <sup>13</sup>C NMR (101 MHz, CDCl<sub>3</sub>)  $\delta$  202.0, 172.9, 139.5, 139.1, 135.6, 129.7, 129.0 (d, J = 1.7 Hz), 128.5, 128.1, 126.4, 77.4, 77.1, 76.8, 60.4, 47.0, 38.4, 31.6, 27.1, 14.2. HRMS(ESI): m/z: [M+Na]<sup>+</sup> calculated for C<sub>20</sub>H<sub>21</sub>ClNaO<sub>3</sub>: 367.1072, Found: 367.1070.

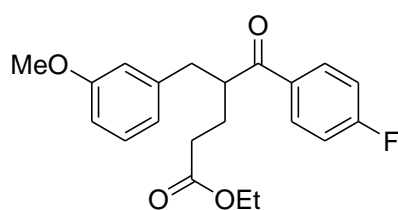

**ethyl-4-(3-methoxybenzyl)-5-(4-fluorophenyl)-5-oxopentanoate (7k):**

<sup>1</sup>H NMR (400 MHz, CDCl<sub>3</sub>)  $\delta$  7.81 (dd, J = 8.8, 5.4 Hz, 2H), 7.03 (t, J = 8.2 Hz, 1H), 6.97 (t, J = 8.6 Hz, 2H), 6.64 (d, J = 7.6 Hz, 1H),

6.59 (d, J = 6.0 Hz, 2H), 3.97 (q, J = 7.1 Hz, 2H), 3.78 – 3.68 (m, 1H), 3.63 (s, 3H),

2.96 (dd, J = 13.7, 7.7 Hz, 1H), 2.65 (dd, J = 13.7, 6.5 Hz, 1H), 2.24 (dd, J = 8.0, 6.6 Hz, 1H), 2.08 (ddd, J = 20.2, 15.3, 7.0 Hz, 2H), 1.86 – 1.75 (m, 1H), 1.09 (t, J = 7.1 Hz, 3H). <sup>13</sup>C NMR (101 MHz, CDCl<sub>3</sub>) δ 201.5, 172.9, 159.7, 140.7, 133.7, 130.9 (d, J = 9.3 Hz), 129.4, 121.3, 115.8, 115.5, 114.8, 111.7, 77.4, 77.1, 76.8, 60.4, 55.1, 46.8, 38.4, 31.6, 27.2, 14.1. <sup>19</sup>F NMR (471 MHz, CDCl<sub>3</sub>) δ -105.17 (s). HRMS(ESI): m/z: [M+Na]<sup>+</sup> calculated for C<sub>21</sub>H<sub>23</sub>FNao<sub>4</sub>: 381.1473, Found: 381.1462.

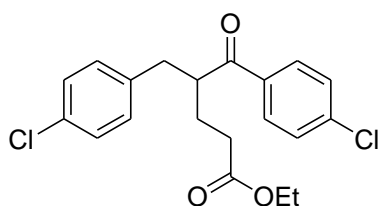

**ethyl-4-(4-chlorobenzyl)-5-(4-chlorophenyl)-5-oxopentanoate (7l):** <sup>1</sup>H NMR (400 MHz, CDCl<sub>3</sub>) δ 7.71 (d, J = 8.6 Hz, 2H), 7.29 (d, J = 8.6 Hz, 2H), 7.08 (d, J = 8.4 Hz, 2H), 6.98 (d, J = 8.4 Hz, 2H), 3.99 (q, J = 7.1

Hz, 2H), 3.71 (t, J = 5.9 Hz, 1H), 2.96 (dd, J = 13.7, 8.0 Hz, 1H), 2.65 (dd, J = 13.7, 6.1 Hz, 1H), 2.24 (dd, J = 7.6, 6.9 Hz, 1H), 2.18 – 2.08 (m, 1H), 2.05 – 1.94 (m, 1H), 1.83 – 1.72 (m, 1H), 1.10 (t, J = 7.1 Hz, 3H). <sup>13</sup>C NMR (101 MHz, CDCl<sub>3</sub>) δ 201.6, 172.8, 139.7, 137.6, 135.3, 132.2, 130.3, 129.6, 129.0, 128.6, 77.4, 77.1, 76.8, 60.5, 46.8, 37.4, 31.4, 27.2, 14.2. HRMS(ESI): m/z: [M+Na]<sup>+</sup> calculated for C<sub>20</sub>H<sub>20</sub>Cl<sub>2</sub>NaO<sub>3</sub>: 401.0682, Found: 401.0680.

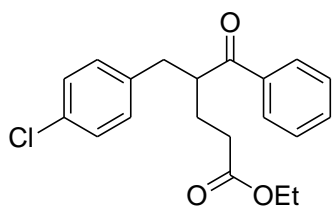

**ethyl-4-(4-chlorobenzyl)-5-oxo-5-phenylpentanoate (7m):** <sup>1</sup>H NMR (400 MHz, CDCl<sub>3</sub>) δ 7.87 (d, J = 7.2 Hz, 2H), 7.52 (t, J = 7.3 Hz, 1H), 7.41 (t, J = 7.7 Hz, 2H), 7.17 (d, J = 8.4 Hz, 2H), 7.08 (d, J = 8.4 Hz, 2H), 4.06 (q,

J = 7.1 Hz, 2H), 3.85 (dd, J = 9.6, 3.8 Hz, 1H), 3.07 (dd, J = 13.7, 7.7 Hz, 1H), 2.74 (dd, J = 13.8, 6.4 Hz, 1H), 2.33 (dd, J = 8.2, 6.4 Hz, 1H), 2.24 (dd, J = 15.7, 8.3 Hz, 1H), 2.11 (dd, J = 13.9, 6.3 Hz, 1H), 1.92 – 1.81 (m, 1H), 1.17 (t, J = 7.1 Hz, 3H). <sup>13</sup>C NMR (101 MHz, CDCl<sub>3</sub>) δ 202.7, 172.9, 137.8, 137.1, 133.2, 132.1, 130.4, 128.6 (d, J = 17.8 Hz), 128.7, 128.6, 77.5, 77.1, 76.8, 60.4, 46.7, 37.5, 31.6, 27.1, 14.1. HRMS(ESI): m/z: [M+Na]<sup>+</sup> calculated for C<sub>20</sub>H<sub>21</sub>ClNaO<sub>3</sub>: 367.1072, Found: 367.1070.

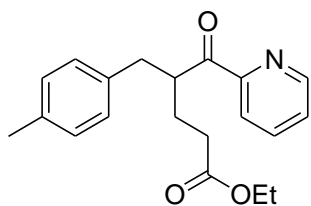

**ethyl-4-(4-methylbenzyl)-5-oxo-5-(pyridin-2-yl)pentanoate (7n):**

$^1\text{H}$  NMR (400 MHz,  $\text{CDCl}_3$ )  $\delta$  8.66 (ddd,  $J = 4.7, 1.6, 0.9$  Hz, 1H), 8.02 – 7.96 (m, 1H), 7.82 – 7.74 (m, 1H), 7.46 – 7.36 (m, 1H), 7.10 (d,  $J = 8.0$  Hz, 2H), 7.02 (d,  $J = 7.9$  Hz, 2H), 4.56 – 4.42 (m, 1H), 4.04 (q,  $J = 7.1$  Hz, 2H), 3.10 (dd,  $J = 13.7, 6.7$  Hz, 1H), 2.69 (dd,  $J = 13.7, 7.6$  Hz, 1H), 2.29 (dd,  $J = 9.6, 6.0$  Hz, 1H), 2.26 (s, 3H), 2.25 – 2.18 (m, 1H), 2.09 (dd,  $J = 14.2, 5.5$  Hz, 1H), 1.93 (dd,  $J = 4.7, 2.9$  Hz, 1H), 1.16 (t,  $J = 7.1$  Hz, 3H).  $^{13}\text{C}$  NMR (101 MHz,  $\text{CDCl}_3$ )  $\delta$  203.9, 173.1, 153.2, 149.0, 136.8, 136.4, 135.5, 129.0 (d,  $J = 3.8$  Hz), 128.9, 127.0, 122.3, 77.4, 77.1, 76.8, 60.2, 45.4, 37.3, 32.1, 26.1, 21.0, 14.1. HRMS(ESI):  $m/z$ :  $[\text{M}+\text{Na}]^+$  calculated for  $\text{C}_{20}\text{H}_{23}\text{NNaO}_3$ : 348.1576, Found: 348.1572.

**Table S1. Optimization of the platinum-catalyzed hydrosilylation of chalcone.**<sup>[a]</sup>

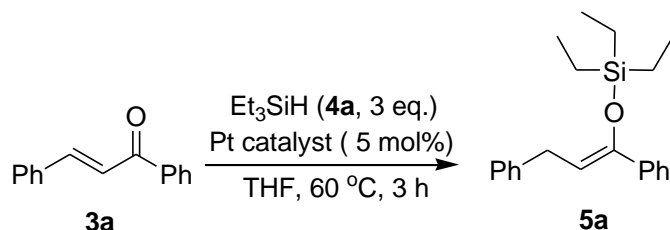

- (1) Pt@G@Si, 94% yield, **Z/E** = 91:9;  
 (2) Pt@Graphite@Si, 56% yield, **Z/E** = 70:30;  
 (3) Pt@Si (without graphene), <5% yield  
 (4) H<sub>2</sub>PtCl<sub>6</sub>, no desired product  
 (5) Karstedt catalyst, no desired product

| Entry             | Pt catalyst                      | Temp. (°C) | Solvent           | Z/E         | Yield (%) <sup>[b]</sup> |
|-------------------|----------------------------------|------------|-------------------|-------------|--------------------------|
| 1                 | Pt@Graphite@Si                   | RT         | THF               | ND          | 35                       |
| 2                 | Pt@Graphite@Si                   | 80         | THF               | ND          | 45                       |
| 3                 | Pt@Graphite@Si                   | 50         | THF               | ND          | 40                       |
| 4                 | Pt@Graphite@Si                   | 65         | THF               | 67:33       | 45                       |
| 5                 | Pt@Graphite@Si                   | 60         | THF               | 70:30       | 56                       |
| 6                 | Pt@Graphite@Si                   | 60         | DCM               | 44:56       | 12                       |
| 7                 | Pt@Graphite@Si                   | 60         | toluene           | 70:30       | 35                       |
| 8                 | Pt@Graphite@Si                   | 60         | EA                | 85:15       | 22                       |
| 9                 | Pt@Graphite@Si                   | 60         | MeCN              | 29:71       | 15                       |
| 10                | Pt@Graphite@Si                   | 60         | Et <sub>2</sub> O | ND          | 35                       |
| 11                | Pt@Graphite@Si                   | 60         | dioxane           | ND          | 30                       |
| 12 <sup>[c]</sup> | Pt@Graphite@Si                   | 60         | THF               | ND          | 40                       |
| 13 <sup>[d]</sup> | Pt@Graphite@Si                   | 60         | THF               | ND          | 30                       |
| 14 <sup>[e]</sup> | Pt@Graphite@Si                   | 60         | THF               | ND          | 42                       |
| 15                | Pt@Si                            | 60         | THF               | ND          | <5                       |
| 16                | H <sub>2</sub> PtCl <sub>6</sub> | 60         | THF               | ND          | 0                        |
| 17                | Karstedt catalyst                | 60         | THF               | ND          | 0                        |
| <b>18</b>         | <b>Pt@G@Si</b>                   | <b>60</b>  | <b>THF</b>        | <b>91:9</b> | <b>94</b>                |

[a] Reactions were performed with chalcone (0.5 mmol), Et<sub>3</sub>SiH (1.5 mmol, 3 equiv.), platinum catalyst (5 mol%), solvent (1 mL). Reaction time is 3 h. **Pt@G@Si** is obtained from graphene-modified PMHS, **Pt@Graphite@Si** is obtained from graphite-modified PMHS, and **Pt@Si** is directly recovered from the H<sub>2</sub>PtCl<sub>6</sub>-catalyzed hydrosilylation of amide without graphene or graphite. The other conditions were shown in this table except special note. [b] Isolated yield. [c] With 1 mmol of Et<sub>3</sub>SiH (2 equiv.). [d] With 0.5 mmol of Et<sub>3</sub>SiH (1 equiv.). [e] With 2 mmol of Et<sub>3</sub>SiH (4 equiv.).

**Table S2. Pt@G@Si-catalyzed hydrosilylation of chalcones with various hydrosilanes.**<sup>[a]</sup>

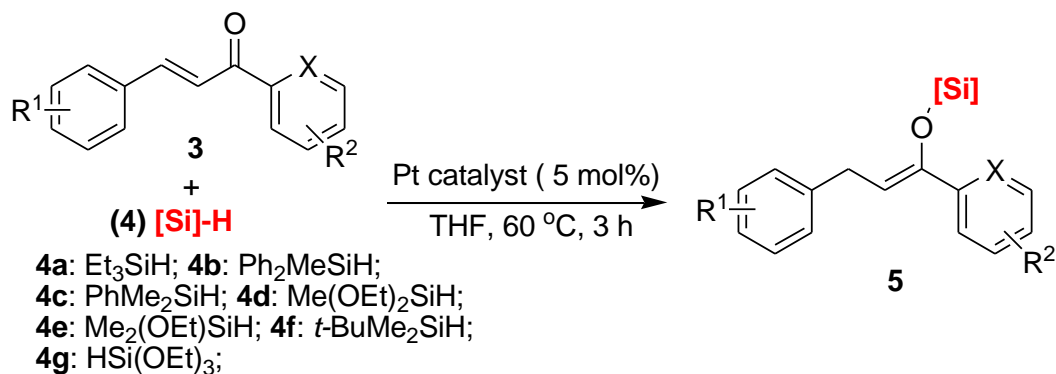

| Entry <sup>a</sup> | R <sup>1</sup> /R <sup>2</sup> | [Si]-H | Ratio of Z/E <sup>b</sup> | Yield (%) <sup>c</sup> |
|--------------------|--------------------------------|--------|---------------------------|------------------------|
| 1                  | H/H                            | 4a     | 91:9                      | 5a: 94                 |
| 2                  | 4-OMe/ H                       | 4a     | 79:21                     | 5b: 83                 |
| 3                  | 4-Br/ H                        | 4a     | 96:4                      | 5c: 86                 |
| 4                  | 2-OMe/ H                       | 4a     | 88:12                     | 5d: 85                 |
| 5                  | 4-Cl/4-Cl                      | 4a     | 80:20                     | 5e: 89                 |
| 6                  | 3-OMe/4-F                      | 4a     | 75:25                     | 5f: 90                 |
| 7                  | 4-Ph/ H                        | 4a     | 80:20                     | 5g: 88                 |
| 8                  | H/4-Me                         | 4a     | 78:22                     | 5h: 90                 |
| 9                  | H/4-Br                         | 4a     | 93:7                      | 5i: 88                 |
| 10                 | H/4-Cl                         | 4a     | 82:18                     | 5j: 91                 |
| 11                 | 4-Cl/ H                        | 4a     | 89:11                     | 5k: 90                 |
| 12                 | 3-OMe/ H                       | 4a     | 77:23                     | 5l: 89                 |
| 13                 | H/4-OMe                        | 4a     | 85:15                     | 5m: 84                 |
| 14                 | 4-Me/ H (X = N)                | 4a     | 97:3                      | 5n: 89                 |
| 15                 | 3-Br/ H (X = N)                | 4a     | 99:1                      | 5o: 84                 |
| 16                 | H/H                            | 4b     | 90:10                     | 5p: 76                 |
| 17                 | H/H                            | 4c     | 90:10                     | 5q: 71                 |
| 18                 | H/H                            | 4d     | 91:9                      | 5r: 81                 |

|           |            |           |              |               |
|-----------|------------|-----------|--------------|---------------|
| <b>19</b> | <b>H/H</b> | <b>4e</b> | <b>90:10</b> | <b>5s: 73</b> |
| <b>20</b> | <b>H/H</b> | <b>4f</b> | <b>90:10</b> | <b>5t: 78</b> |
| <b>21</b> | <b>H/H</b> | <b>4g</b> | <b>99:1</b>  | <b>5u: 83</b> |

[a] Reactions were performed with chalcone (0.5 mmol), hydrosilane ([Si]-H, 1.5 mmol), Pt@G@Si catalyst (5 mol%), THF (1 mL). [b] The ratio of Z/E is determined by <sup>1</sup>H-NMR. [c] Isolated yield.



**Table S3. (PPh<sub>3</sub>)<sub>2</sub>PtCl<sub>2</sub> catalyzed hydrosilylation of chalcones with various hydrosilanes.<sup>[a]</sup>**

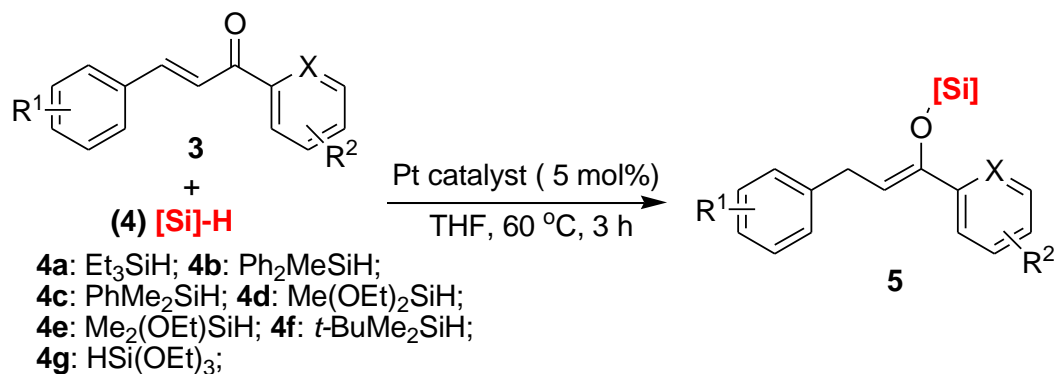

| Entry <sup>a</sup> | R <sup>1</sup> /R <sup>2</sup> | [Si]-H | Ratio of Z/E <sup>b</sup> | Yield (%) <sup>c</sup> |
|--------------------|--------------------------------|--------|---------------------------|------------------------|
| 1                  | H/H                            | 4a     | 98:2                      | 94                     |
| 2                  | 4-OMe/H                        | 4a     | 95:5                      | 87                     |
| 3                  | 4-Br/H                         | 4a     | 96:4                      | 85                     |
| 4                  | 2-OMe/H                        | 4a     | 95:5                      | 88                     |
| 5                  | 4-Cl/4-Cl                      | 4a     | 99:1                      | 86                     |
| 6                  | 3-OMe/4-F                      | 4a     | 99:1                      | 91                     |
| 7                  | 4-Ph/H                         | 4a     | 97:3                      | 86                     |
| 8                  | H/4-Me                         | 4a     | >99:1                     | 83                     |
| 9                  | H/4-Br                         | 4a     | 97:3                      | 82                     |
| 10                 | H/4-Cl                         | 4a     | 99:1                      | 89                     |
| 11                 | 4-Cl/H                         | 4a     | 92:8                      | 84                     |
| 12                 | 3-OMe/H                        | 4a     | 95:5                      | 84                     |
| 13                 | H/4-OMe                        | 4a     | 97:3                      | 86                     |
| 14                 | 4-Me/ H (X = N)                | 4a     | 98:2                      | 85                     |
| 15                 | 3-Br/ H (X = N)                | 4a     | 99:1                      | 81                     |
| 16                 | H/H                            | 4b     | 97:3                      | 81                     |
| 17                 | H/H                            | 4c     | 99:1                      | 87                     |
| 18                 | H/H                            | 4f     | 99:1                      | 83                     |

[a] Reactions were performed with chalcone (0.5 mmol), hydrosilane ([Si]-H, 1.5 mmol),  $(\text{PPh}_3)_2\text{PtCl}_2$  catalyst (5 mol%), THF (1 mL). [b] The ratio of Z/E is determined by  $^1\text{H-NMR}$ . [c] Isolated yield.

**Table S3. ICP-MS analysis of Pt@G@Si and other platinum catalysts.**

| Analyte  | Mass | Intensity | RSD | Platinum/ppb |
|----------|------|-----------|-----|--------------|
| <b>1</b> | 195  | 22846.6   | 0.6 | 4885830.60   |
| <b>2</b> | 195  | 16955.1   | 1.9 | 7310643.78   |
| <b>3</b> | 195  | 107898.6  | 7.8 | 46556429.15  |
| <b>4</b> | 195  | 10571.2   | 1.5 | 2350901.51   |

1. Pt@Graphite@Si (Pt:1 mol%)

2. Pt@G@Si (Pt:1 mol%)

3. Pt@G@Si (Pt:5 mol%)

4. Pt@G@Si (Pt:5 mol%, after recycling the first time).

**5. Figure S1-S14: SEM, TEM, Raman, IR, XRD, XPS and ICP-MS spectra of Pt@G@Si and other platinum catalysts**

**Figure S1. SEM image of Pt@G@Si.**

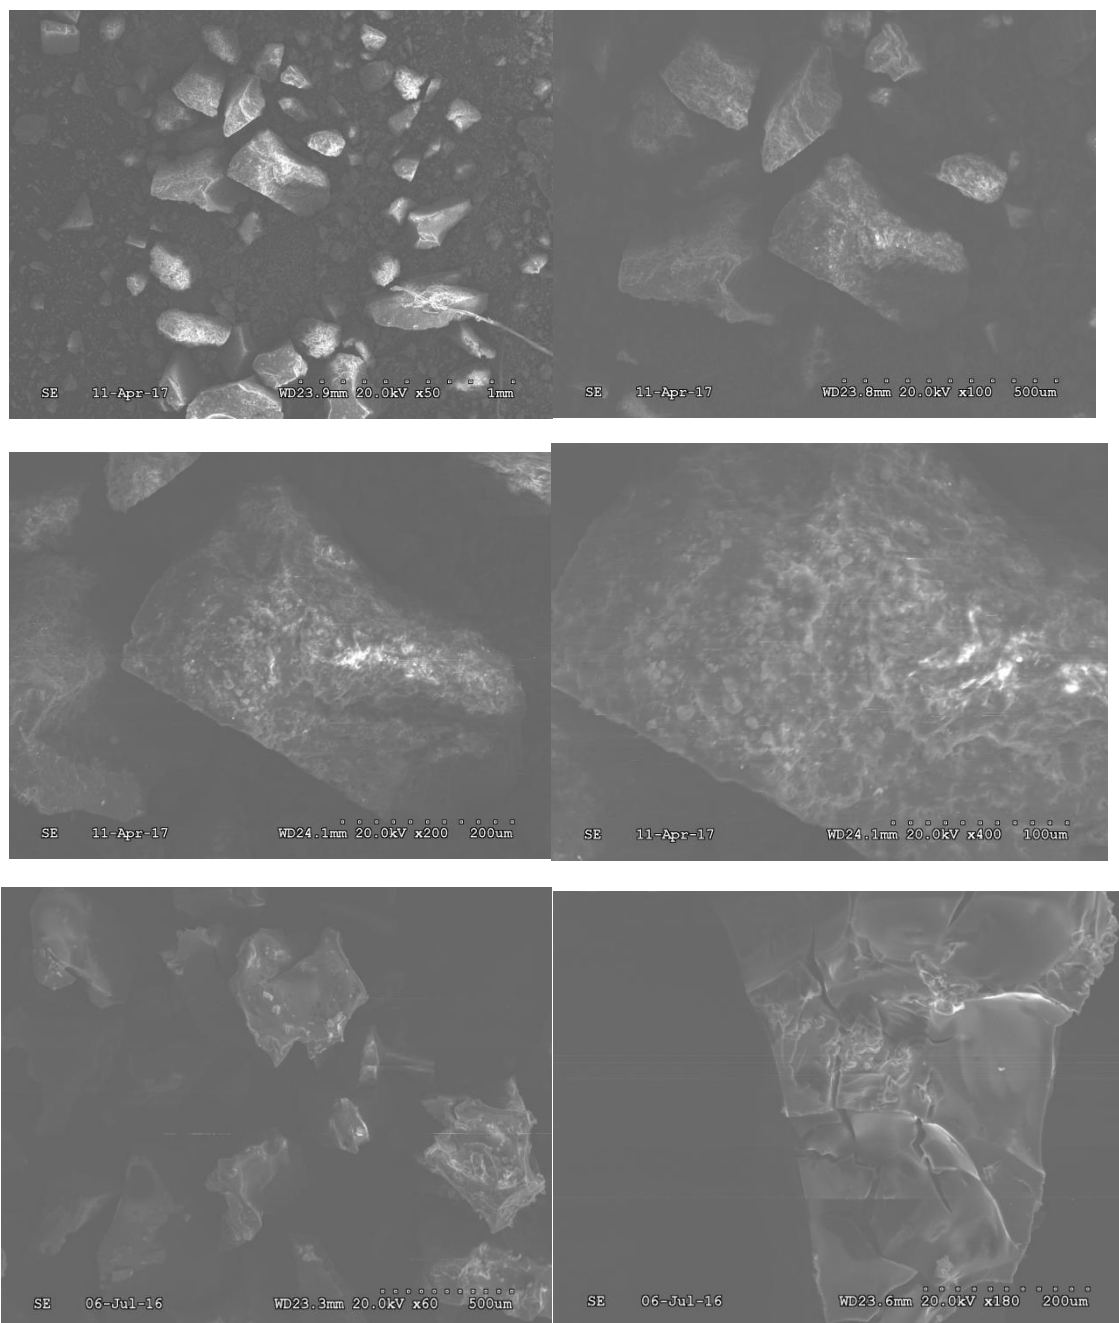

**Figure S2. TEM image of Pt@G@Si.**

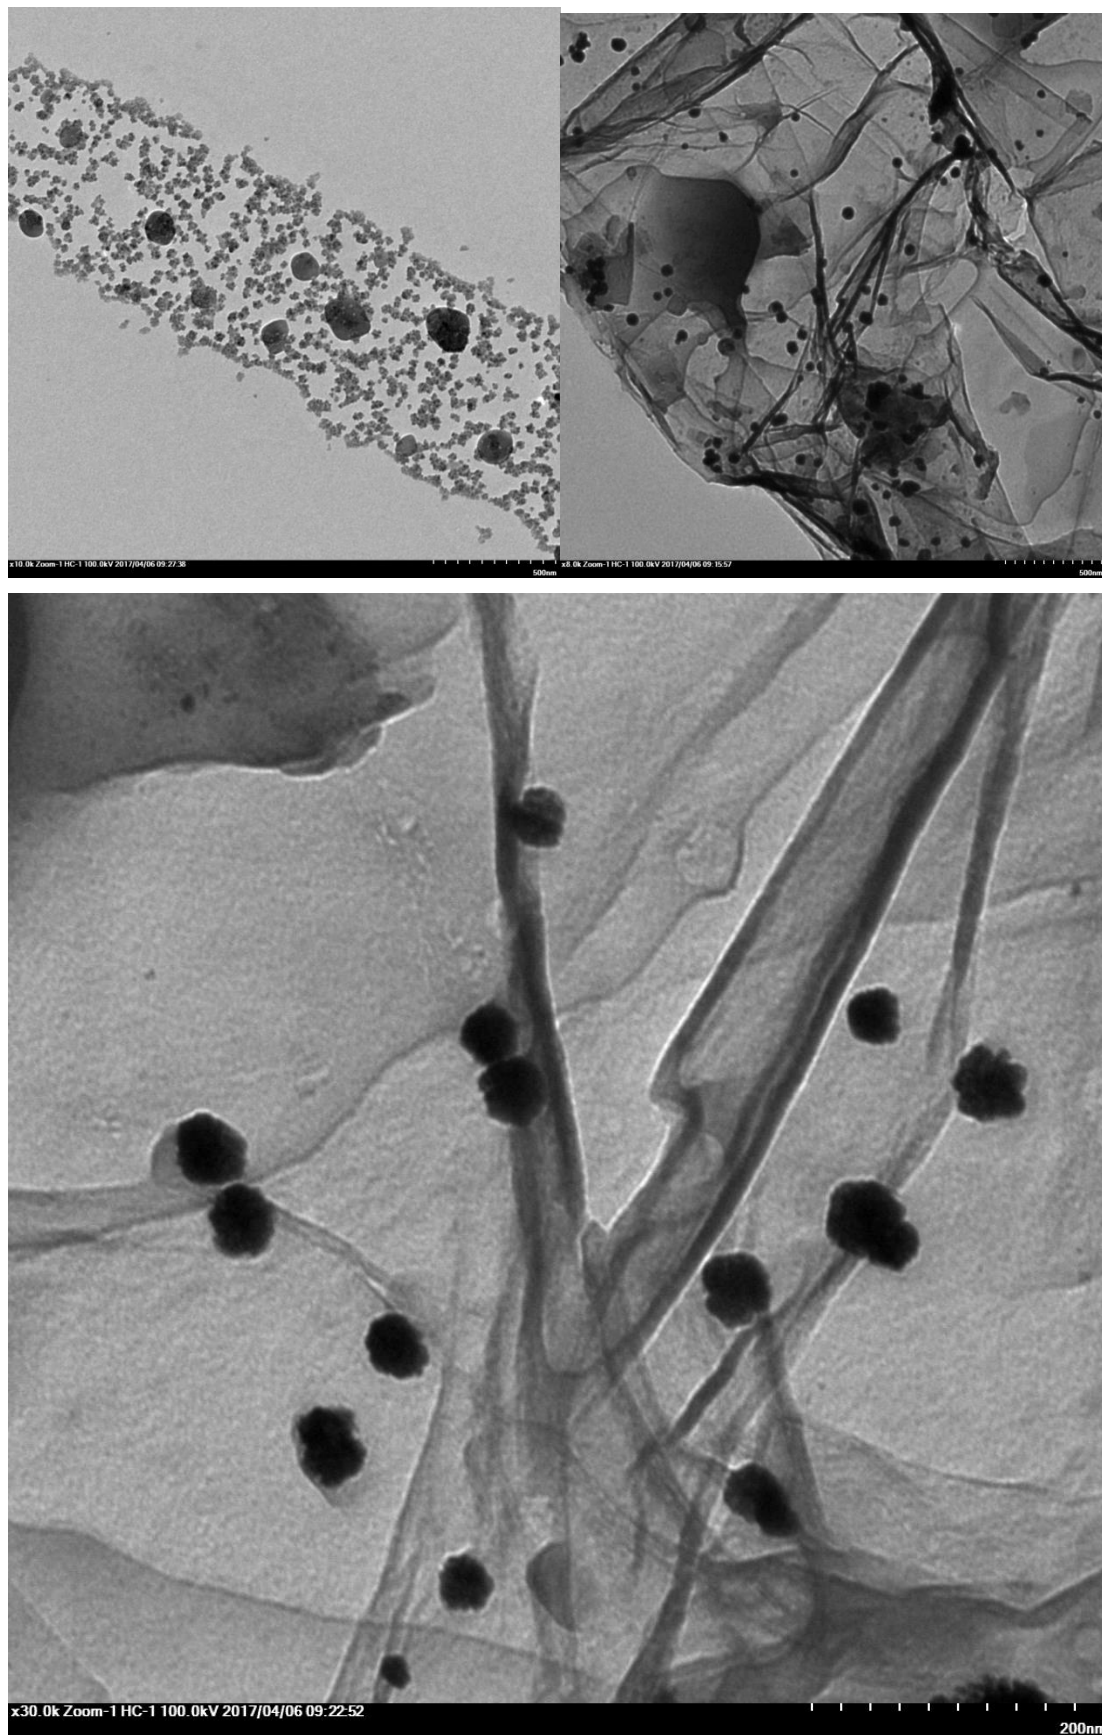

**Figure S3. SEM image of PMHS@graphene.**

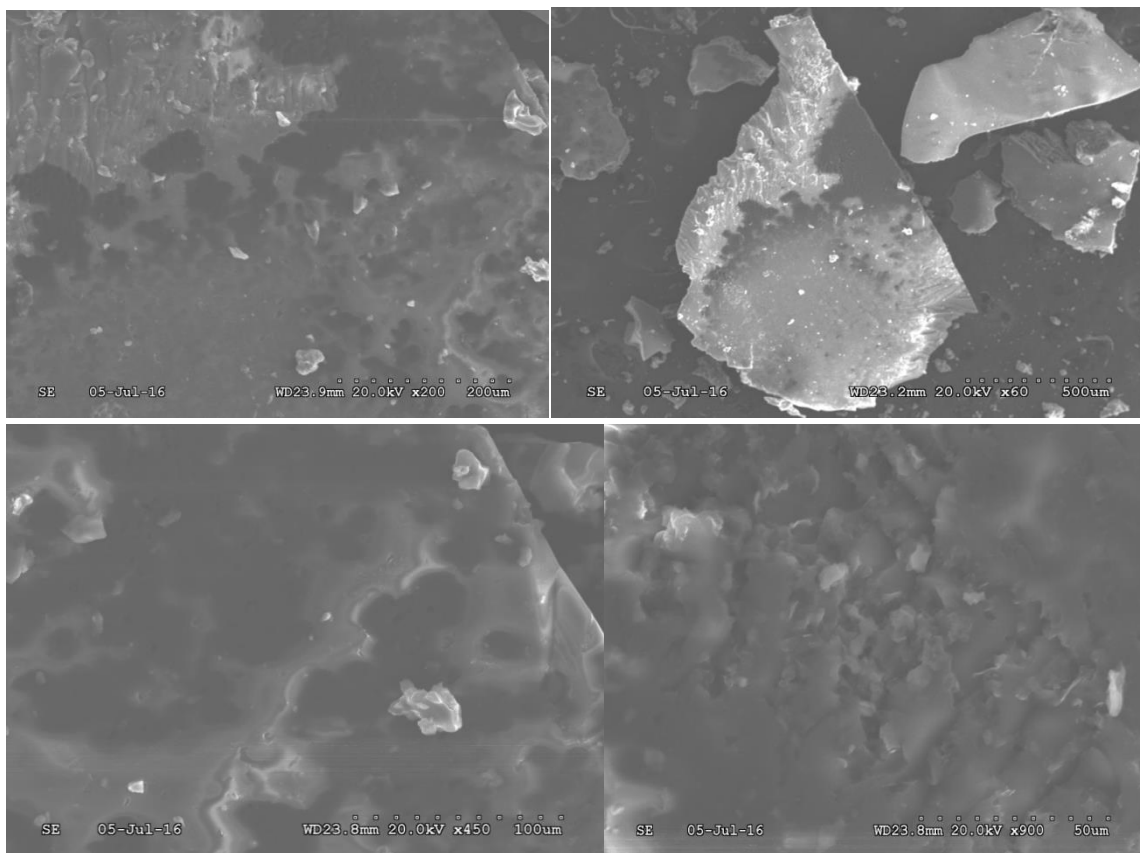

**Figure S4. SEM image of PMHS@graphite.**

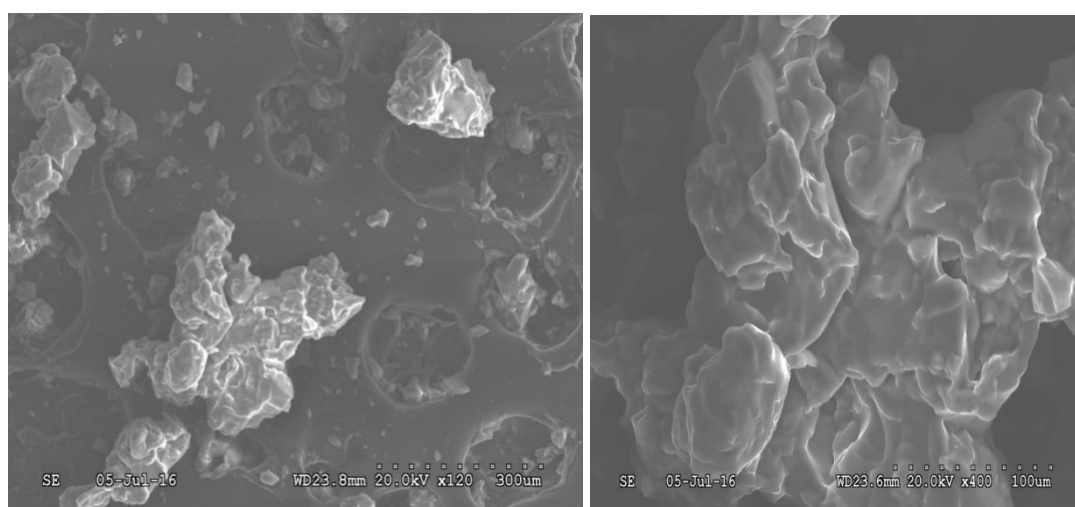

**Figure S5. SEM image of Pt@Graphite@Si.**

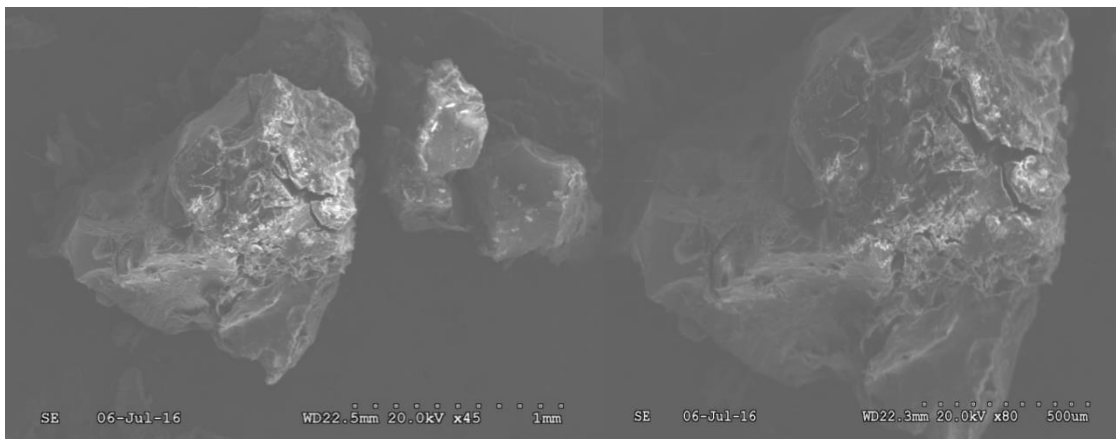

**Figure S6. TEM image of Pt@Graphite@Si**

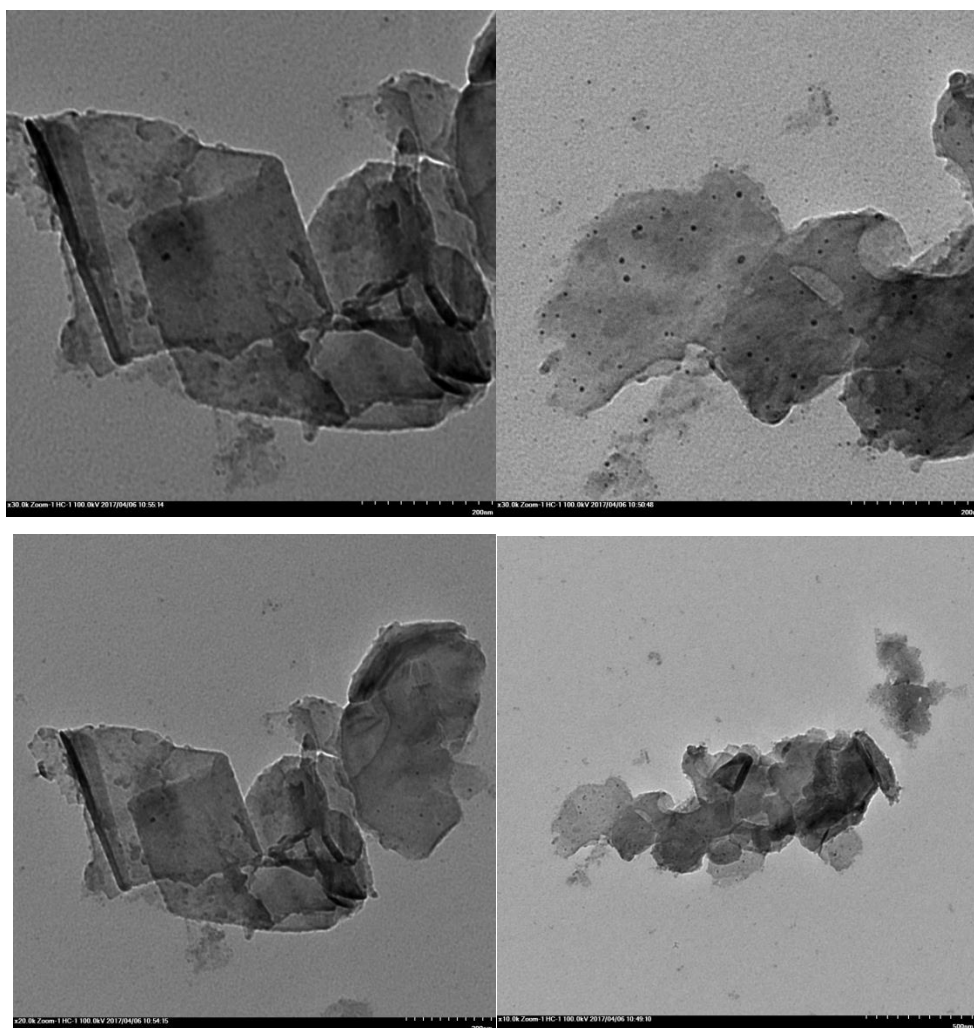

**Figure S7. Raman spectra of Pt@G@Si.**

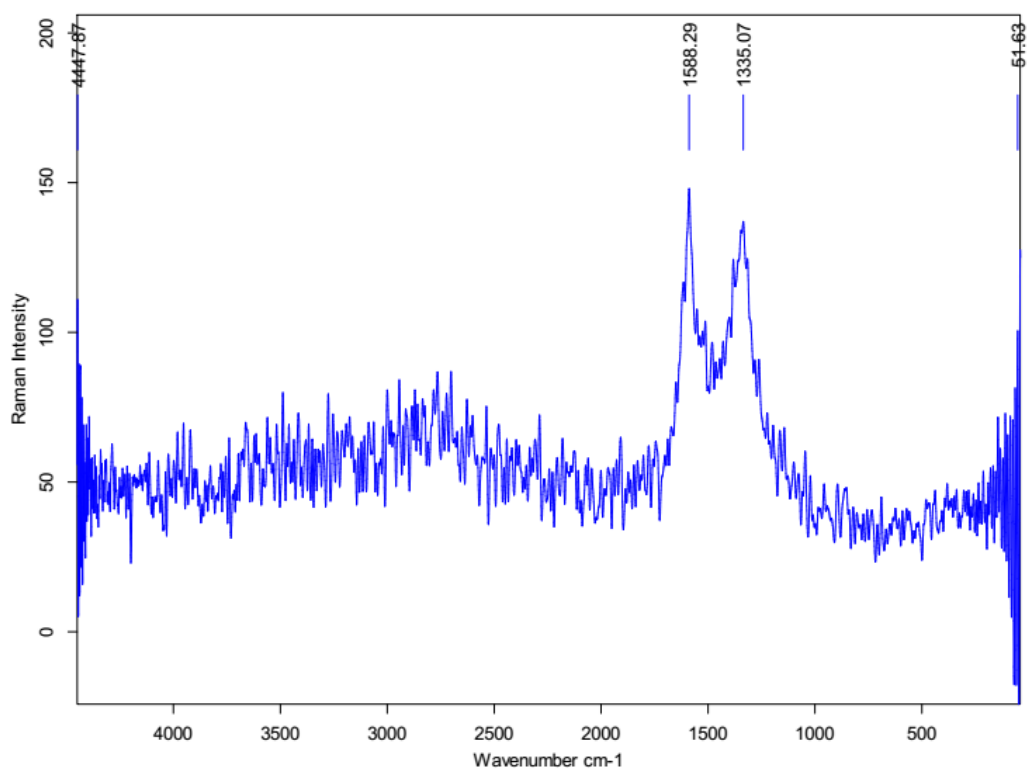

**Figure S8. IR spectra of Pt@G@Si.**

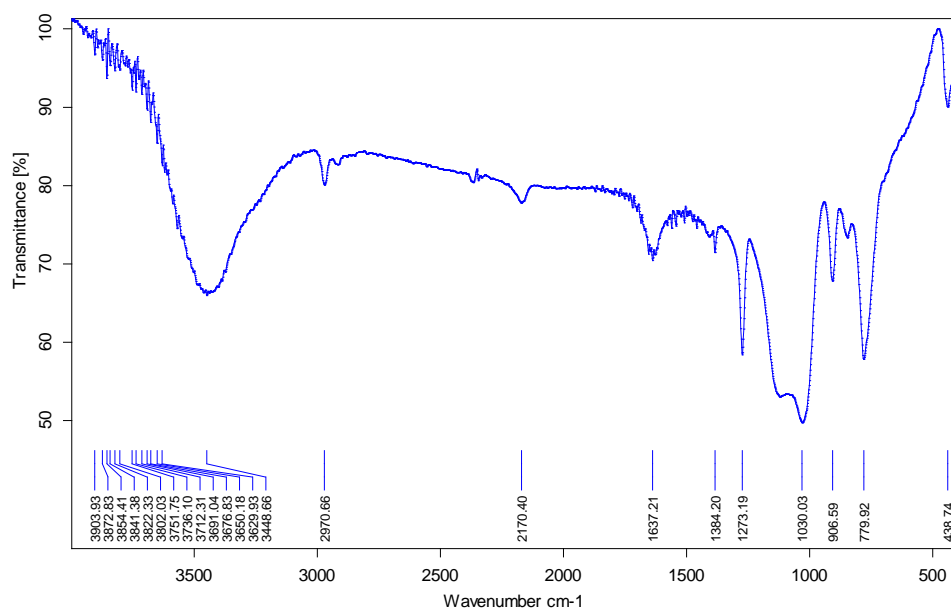

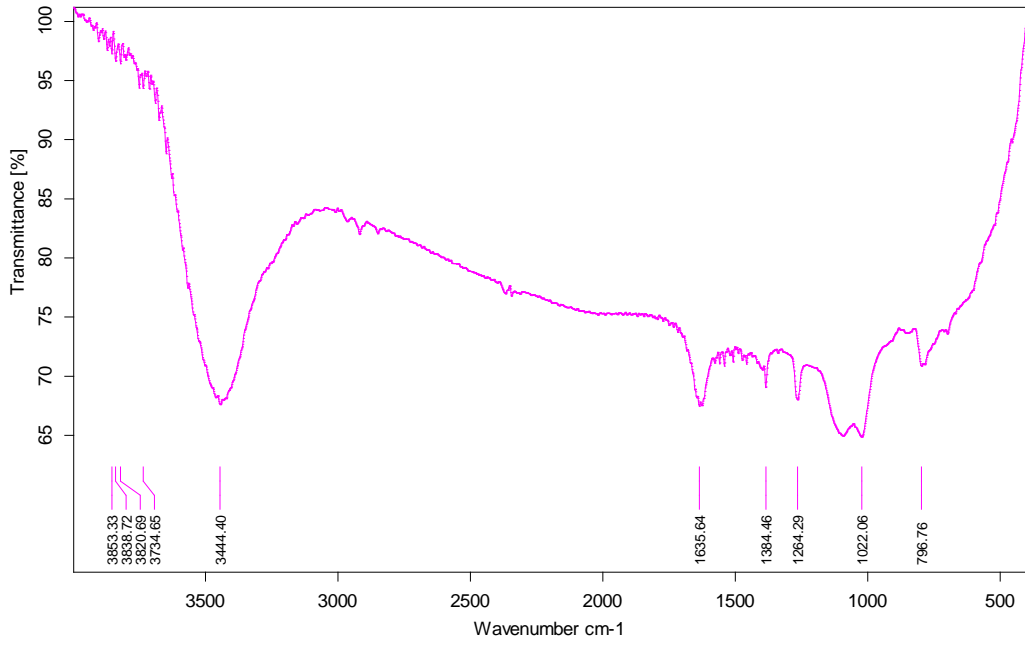

|                        |                  |            |
|------------------------|------------------|------------|
| D:\实验记录\LN20170512-2.1 | LN-20170512-2(2) | 11/05/2012 |
|------------------------|------------------|------------|

Page 1/1

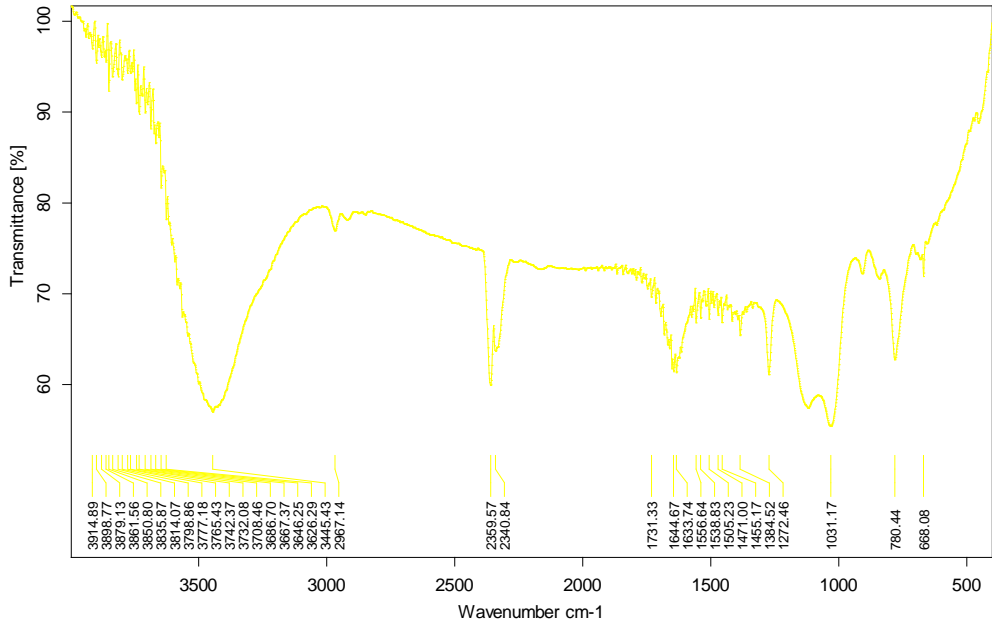

|                        |               |            |
|------------------------|---------------|------------|
| D:\实验记录\LN20170512-5.0 | LN-20170512-5 | 11/05/2012 |
|------------------------|---------------|------------|

Page 1/1

Pt@G@Si (Pt: 5mol%, after recycling the first time)



**Figure S9. XRD for Pt@Graphite@Si (PMHS@graphite powder@Pt) and Pt@G@Si (PMHS@graphene@Pt).**

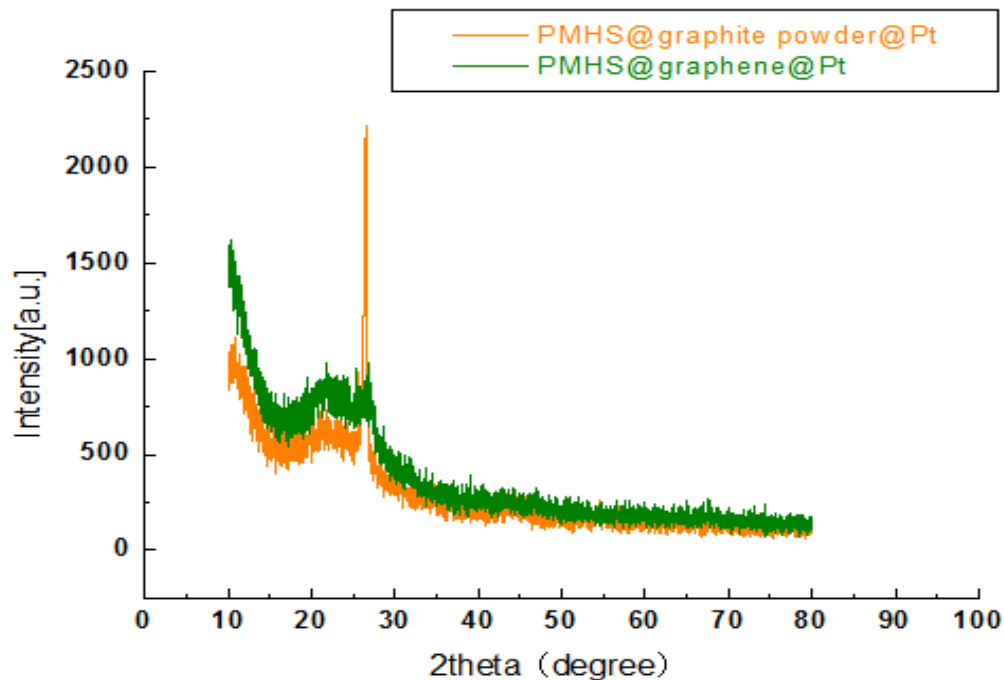

**Figure S10. XRD for PMHS@graphene and PMHS@graphite.**

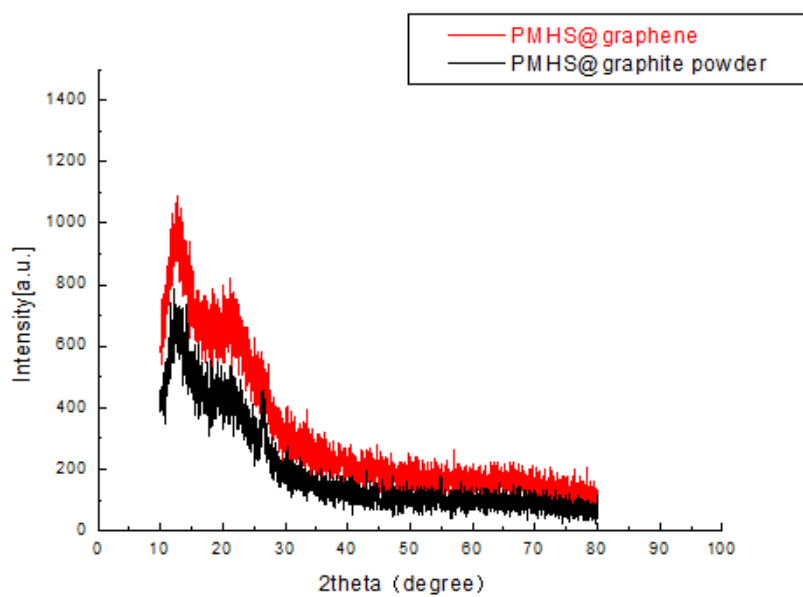

**Figure S11. XPS analysis of Pt@G@Si.**

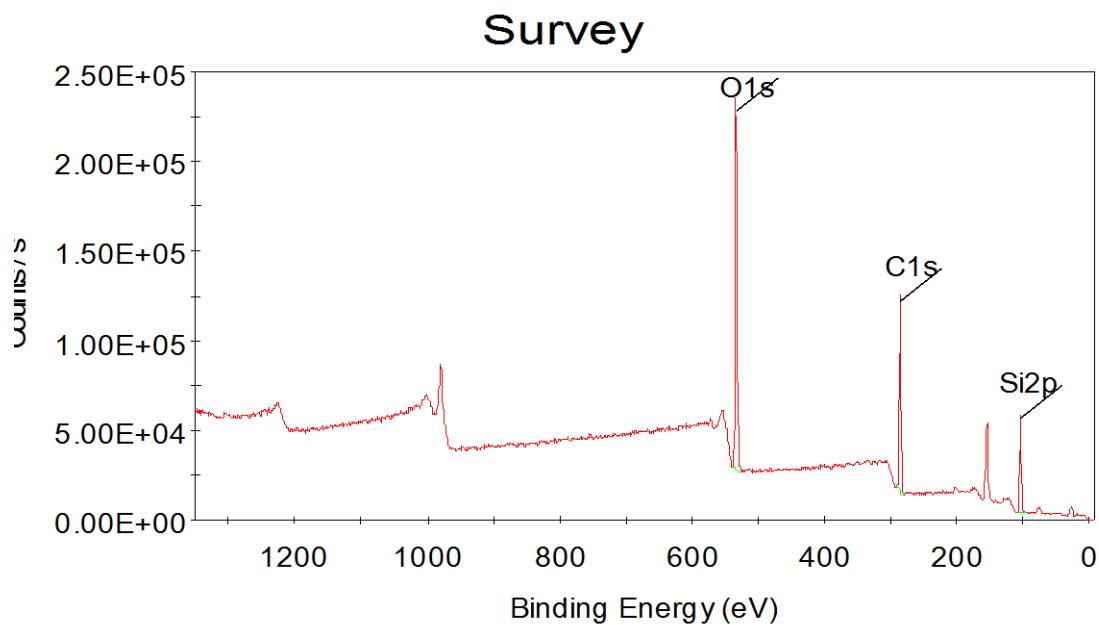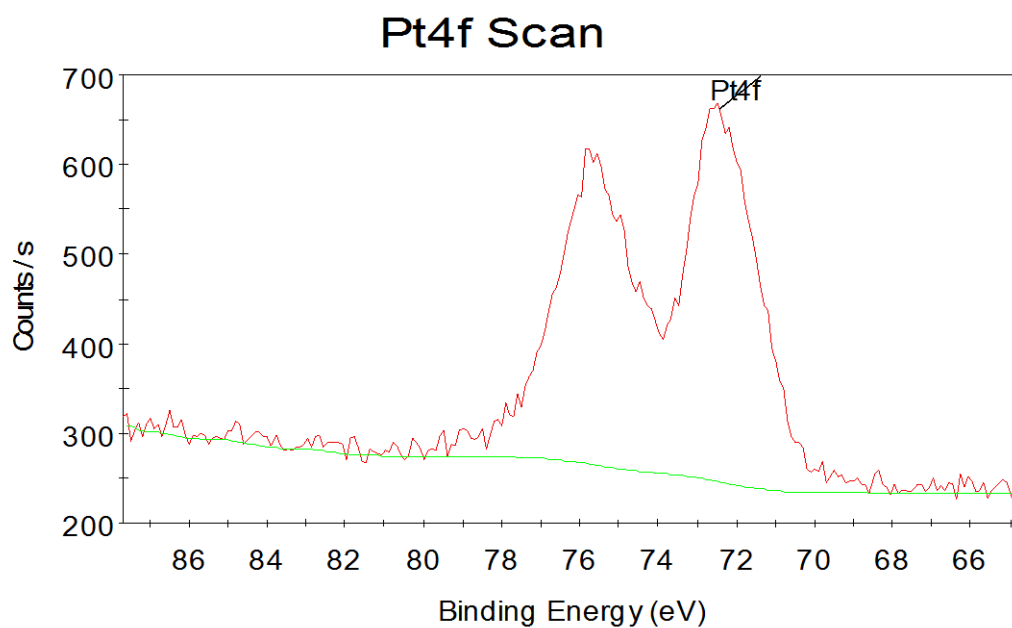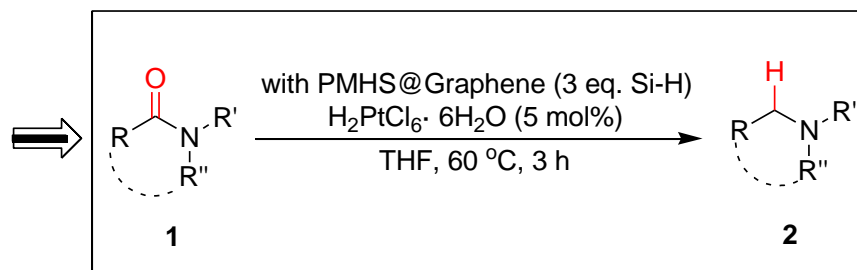

## Survey

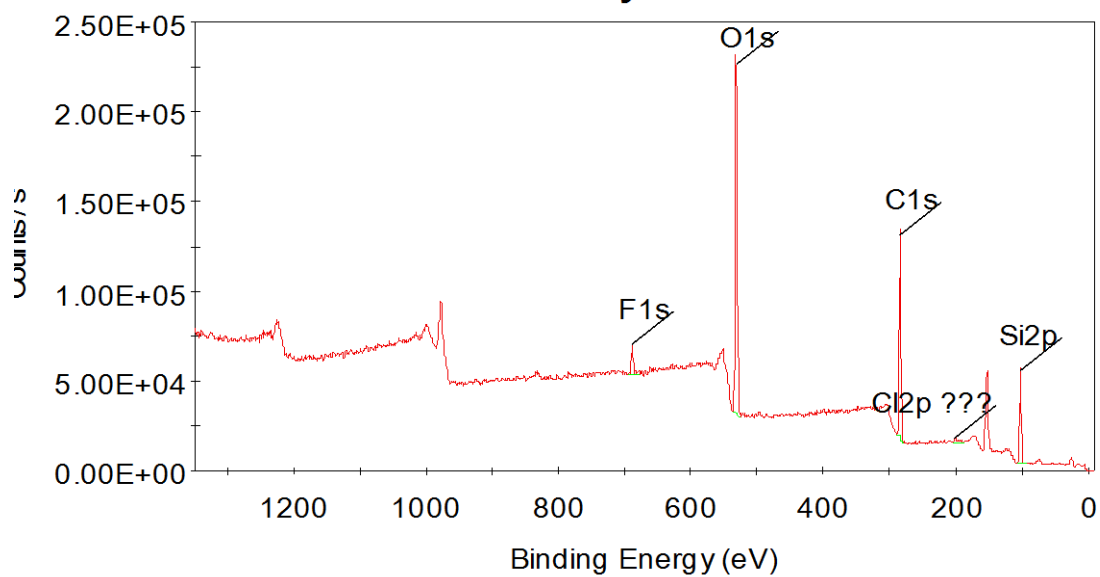

## Pt4f Scan

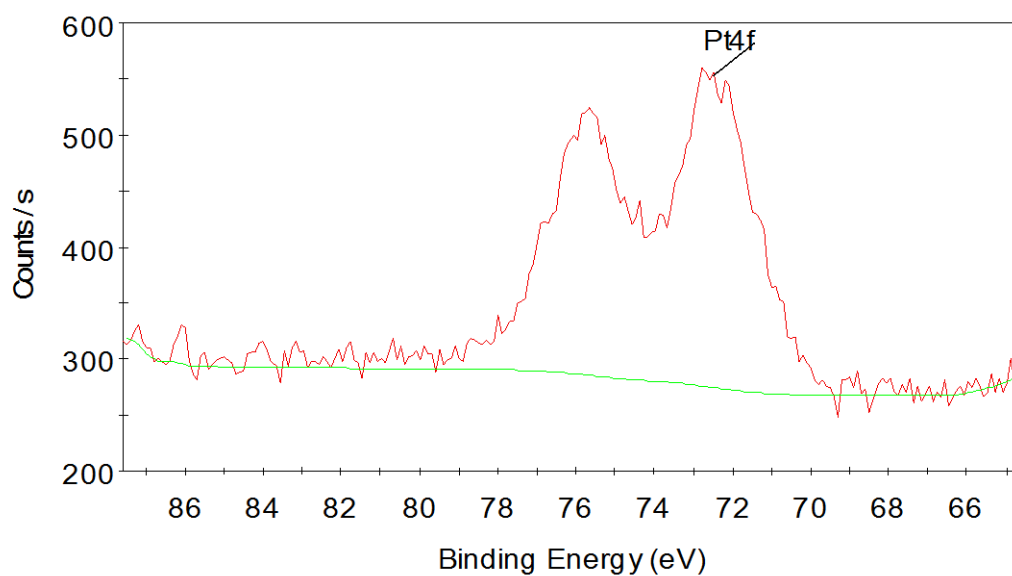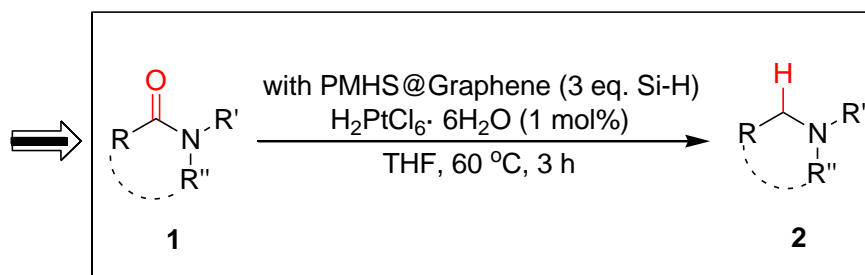

**Figure S12. XPS analysis of Pt@Graphite@Si.**

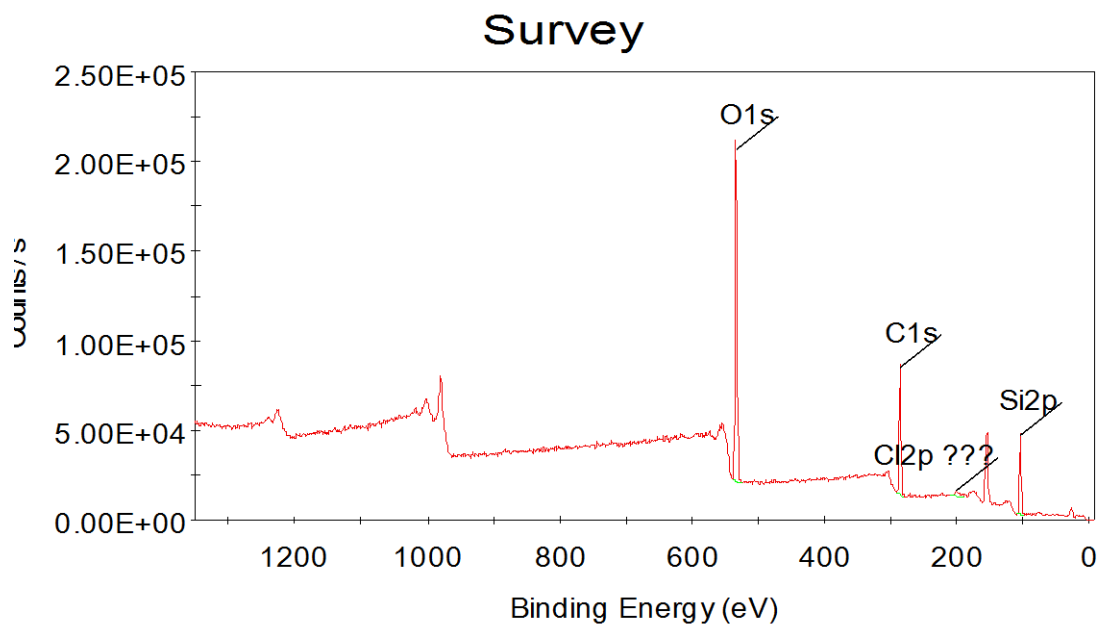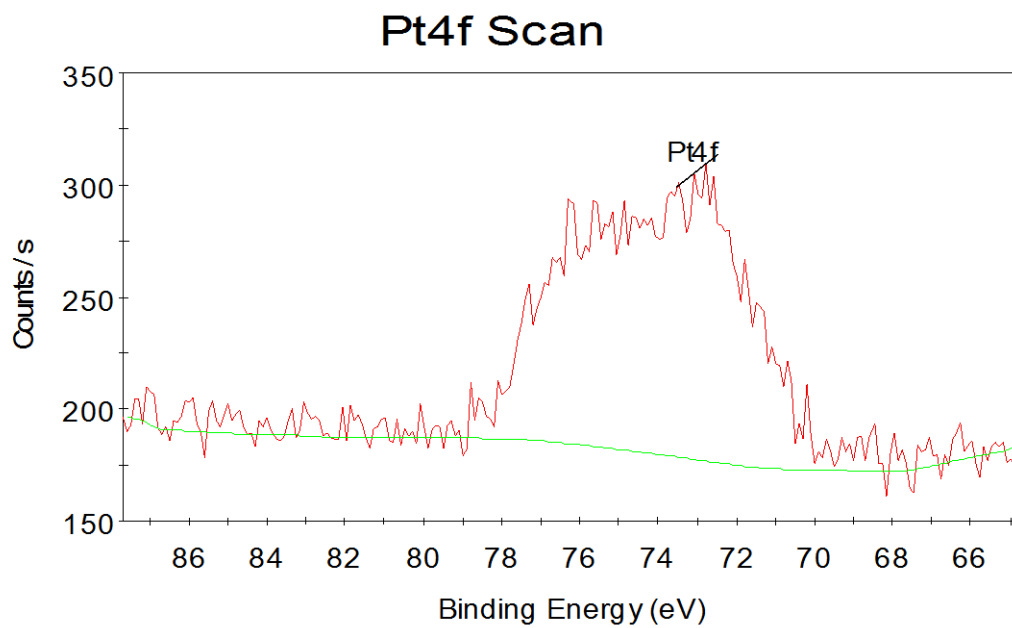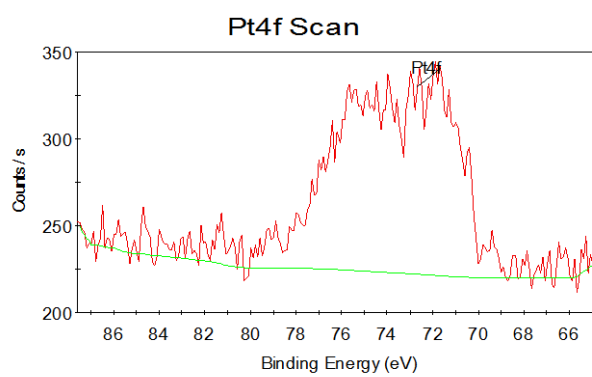

# Figure S13. Solid-state NMR analysis of Pt@G@Si and graphene material.

## (a). Solid-state NMR analysis of graphene

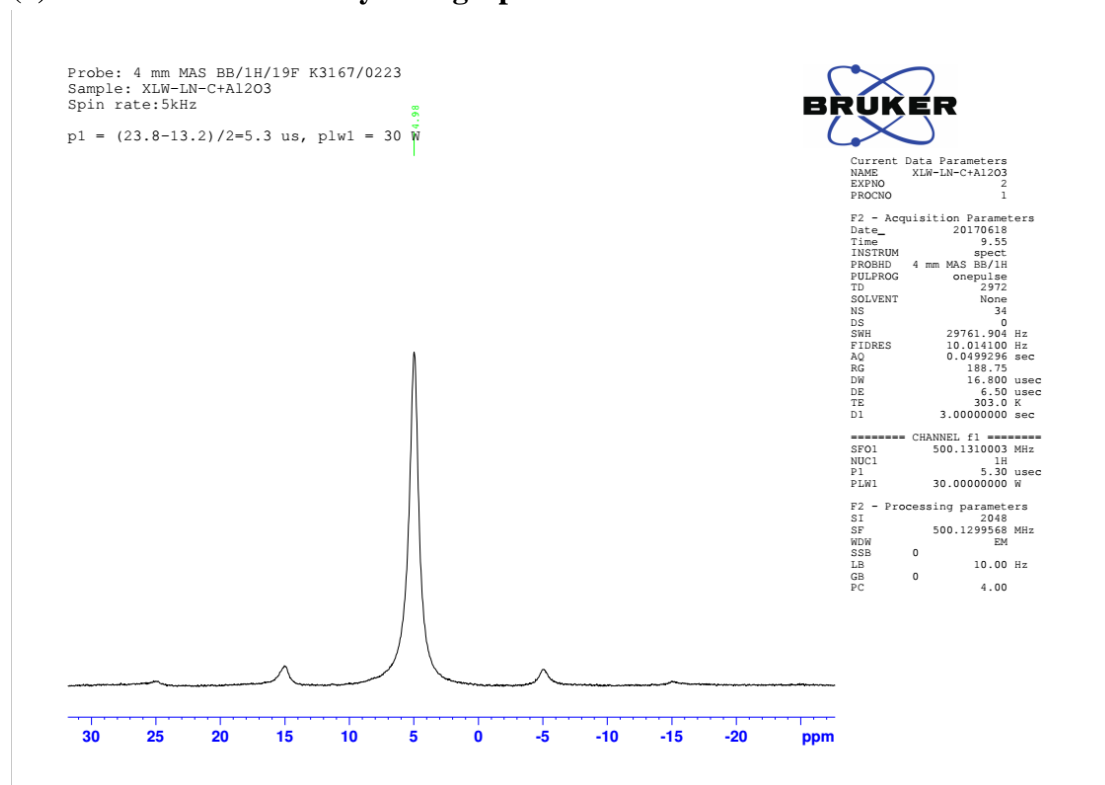

## (b). Solid-state NMR analysis of G@PMHS

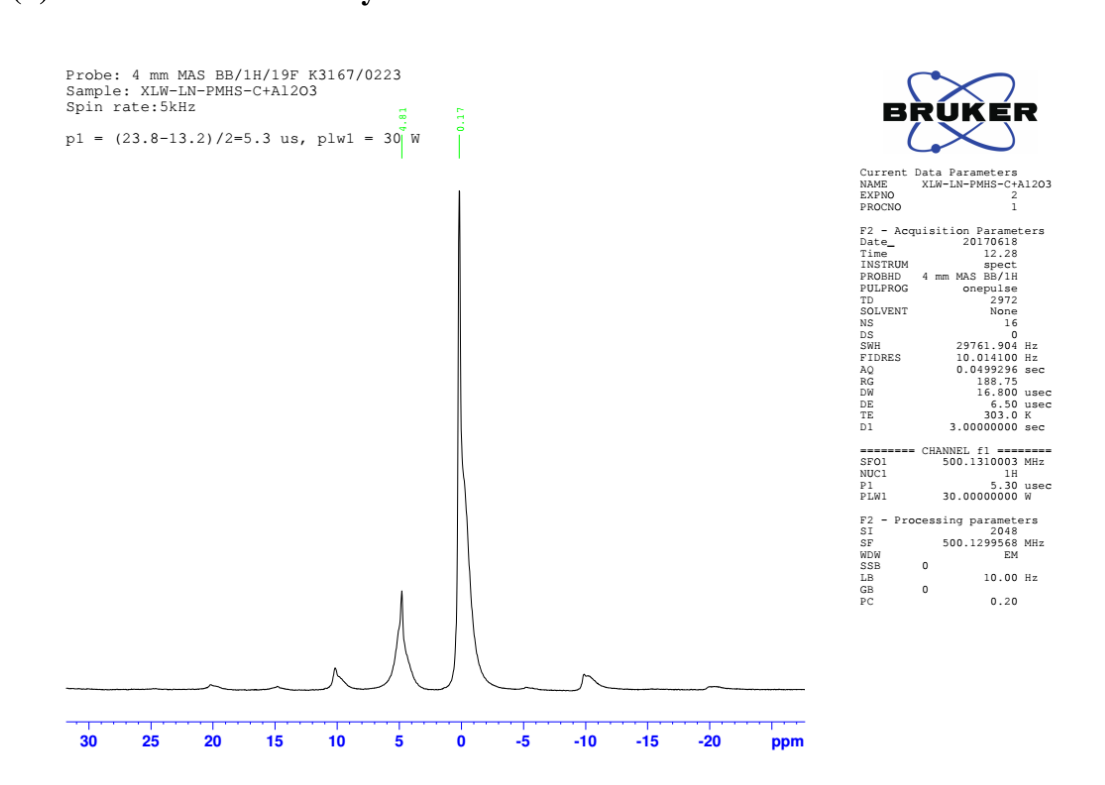

### (c). Solid-state NMR analysis of Pt@G@Si

Probe: 4 mm MAS BB/1H/19F K3167/0223  
Sample: XLW-LN-PMHS-C-Pt+Al2O3  
Spin rate: 5kHz

p1 = (23.8-13.2)/2=5.3 us, plw1 = 30 W

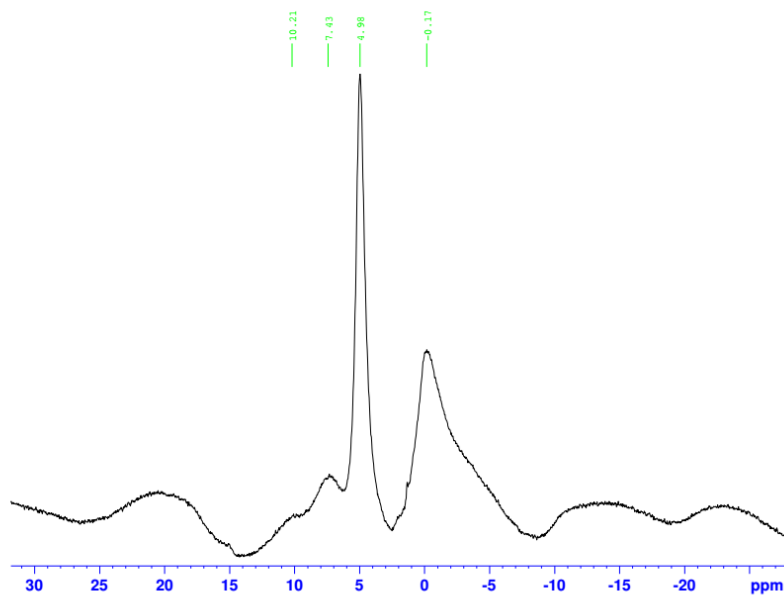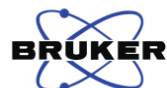

Current Data Parameters  
NAME XLW-LN-PMHS-C-Pt+Al2O3  
EXPNO 2  
PROCNO 1

F2 - Acquisition Parameters  
Date\_ 20170618  
Time 13.12  
INSTRUM spect  
PROBHD 4 mm MAS BB/1H  
PULPROG onepulse  
TD 2972  
SOLVENT None  
NS 16  
DS 0  
SWH 29761.904 Hz  
FIDRES 10.014100 Hz  
AQ 0.0499296 sec  
RG 188.75  
DW 16.800 usec  
DE 6.50 usec  
TE 303.0 K  
D1 3.0000000 sec

----- CHANNEL f1 -----  
SFO1 500.1310003 MHz  
NUC1 1H  
P1 5.30 usec  
PLW1 30.0000000 W

F2 - Processing parameters  
SI 2048  
SF 500.1299568 MHz  
WDW EM  
SSB 0  
LB 10.00 Hz  
GB 0  
FC 0.20

**Figure S14. Spectra analysis of recovered Pt catalyst (Pt@G@Si) after hydrosilylation of chalcone.**

**(a) TEM image of recovered Pt@G@Si**

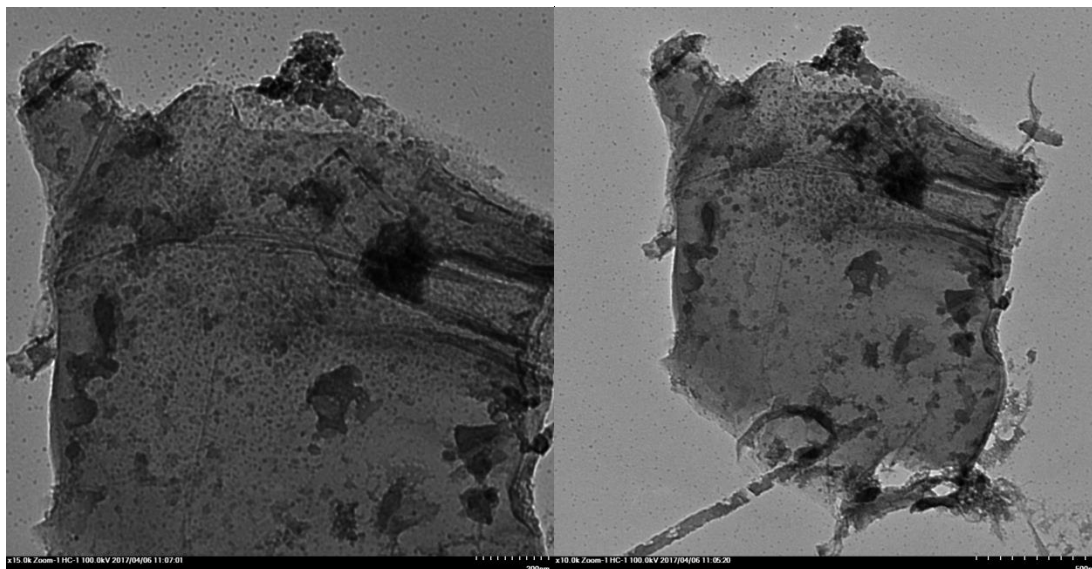

**(b) XPS analysis of recovered Pt@Graphite@Si.**

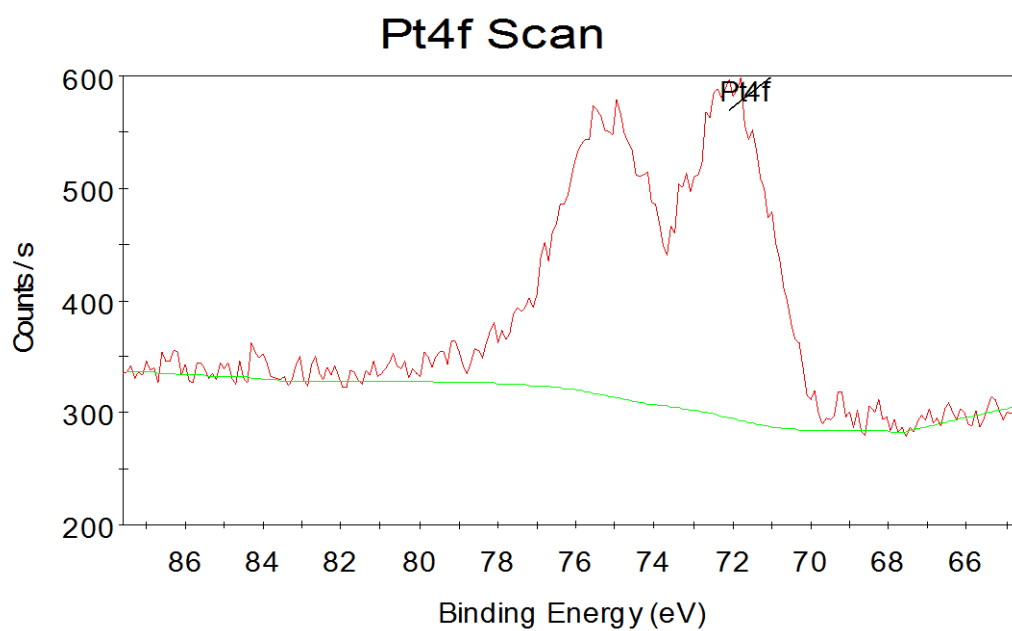

## Survey

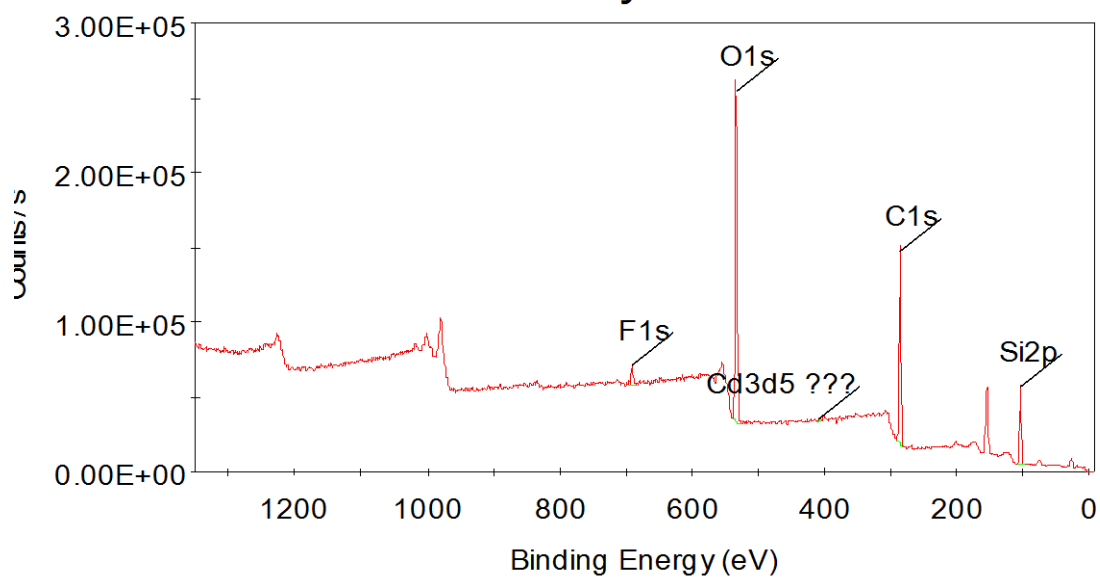

| Name      | Start BE | Peak BE | End BE | Height CPS | FWHM eV |
|-----------|----------|---------|--------|------------|---------|
| O1s       | 538.08   | 532.92  | 524.58 | 210770.98  | 2.99    |
| C1s       | 291.08   | 285.26  | 278.58 | 121917.21  | 2.98    |
| Si2p      | 108.58   | 103.22  | 96.08  | 49979.67   | 2.99    |
| F1s       | 697.08   | 690.26  | 684.08 | 13243.25   | 3.43    |
| Cd3d5 ??? | 410.08   | 407.5   | 403.08 | 2118.46    | 1.59    |
| Pt4f      | 87.48    | 72.07   | 64.68  | 296.24     | 2.8     |
| C1s       | 295.48   | 284.76  | 279.68 | 16340.92   | 1.71    |



## 6. Copies of $^1\text{H}$ , $^{13}\text{C}$ , $^{29}\text{Si}$ and $^{19}\text{F}$ NMR spectra for the products.

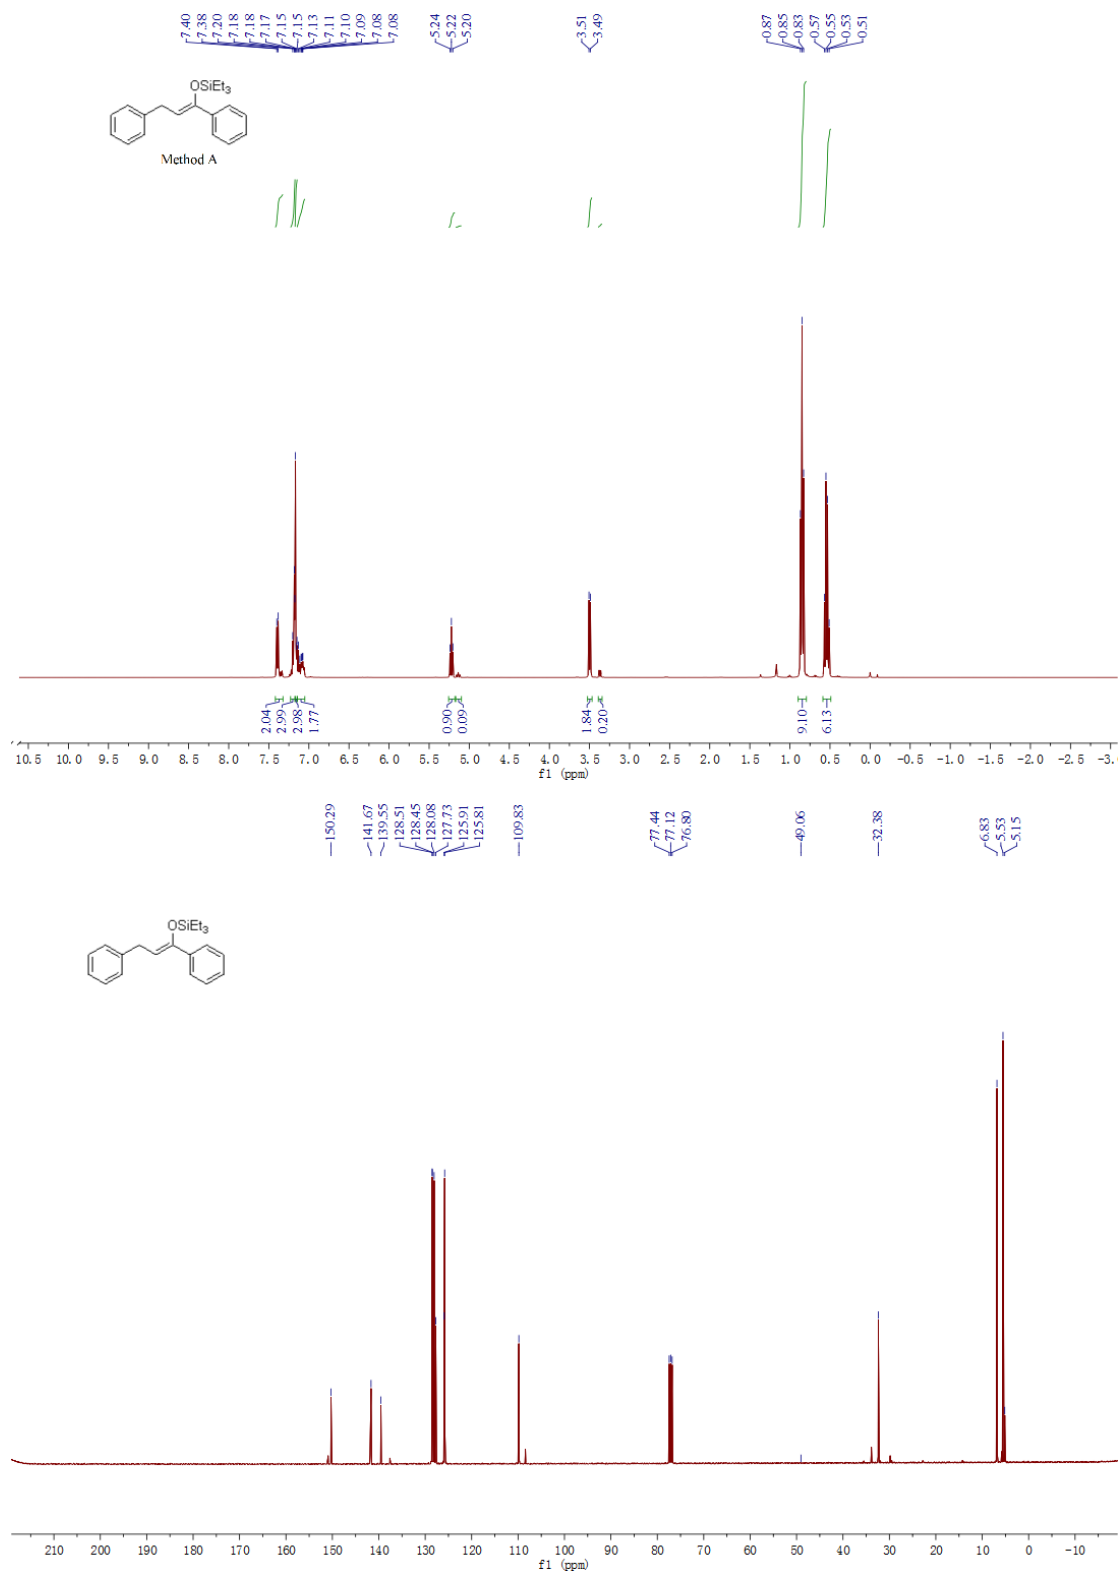

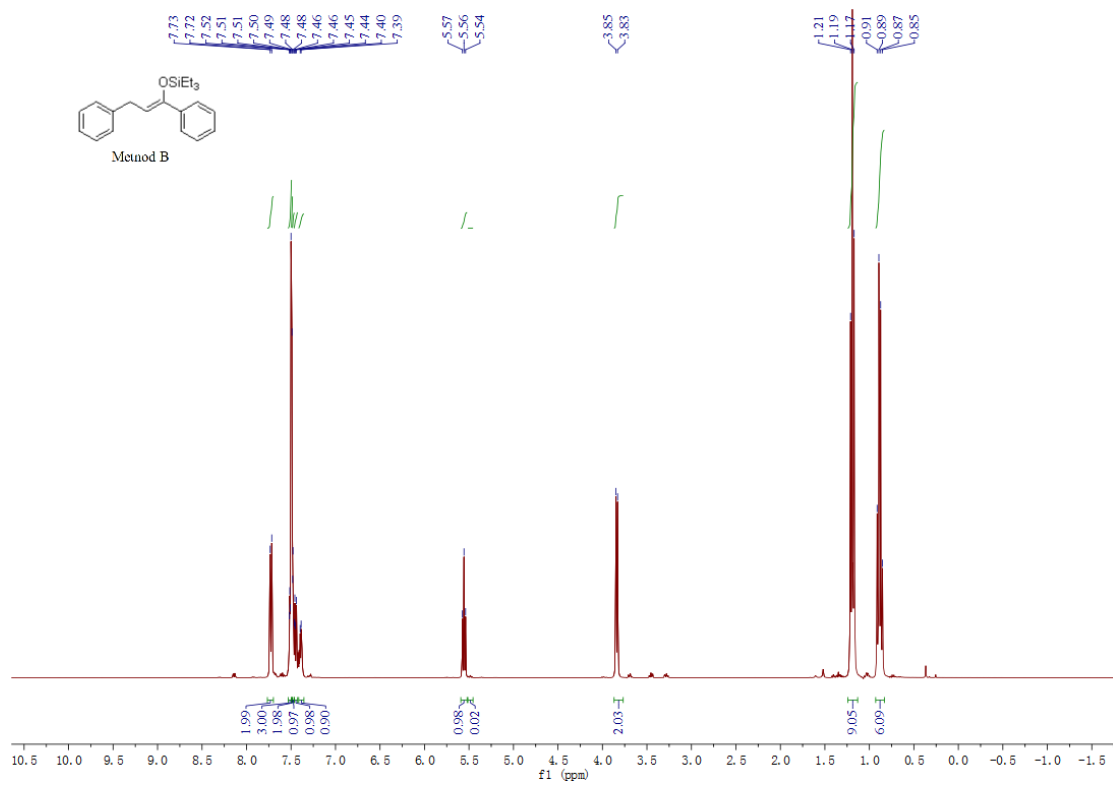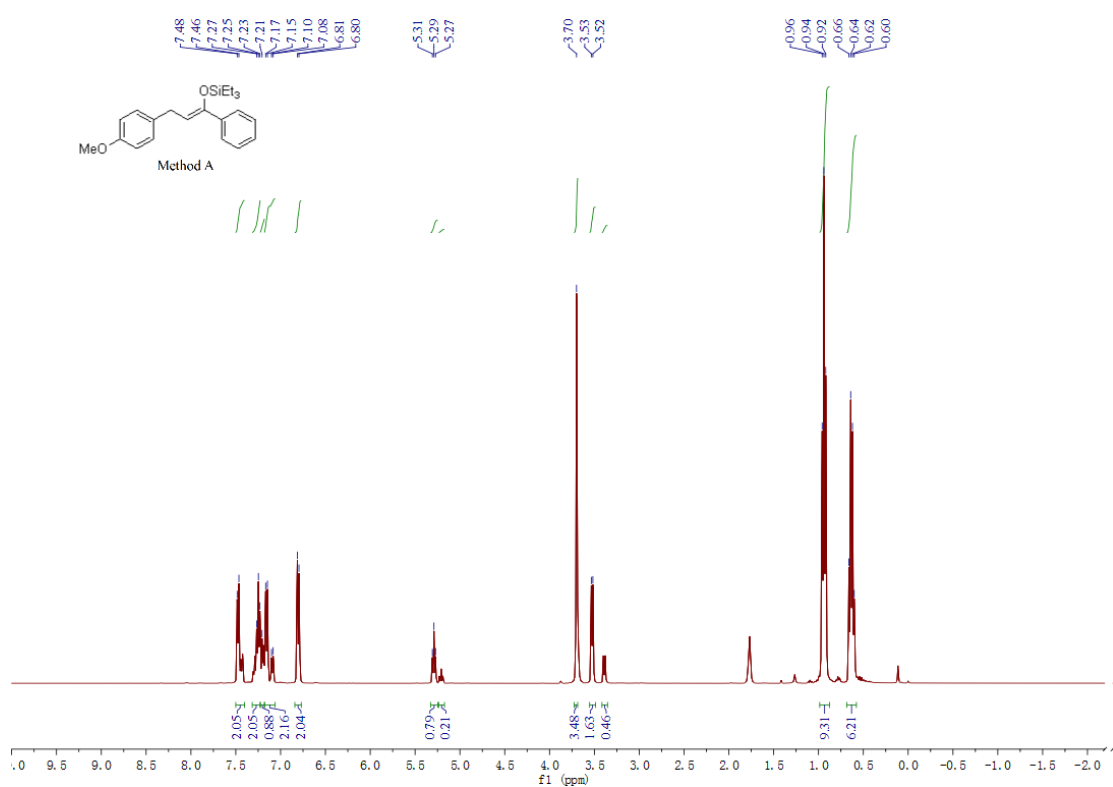

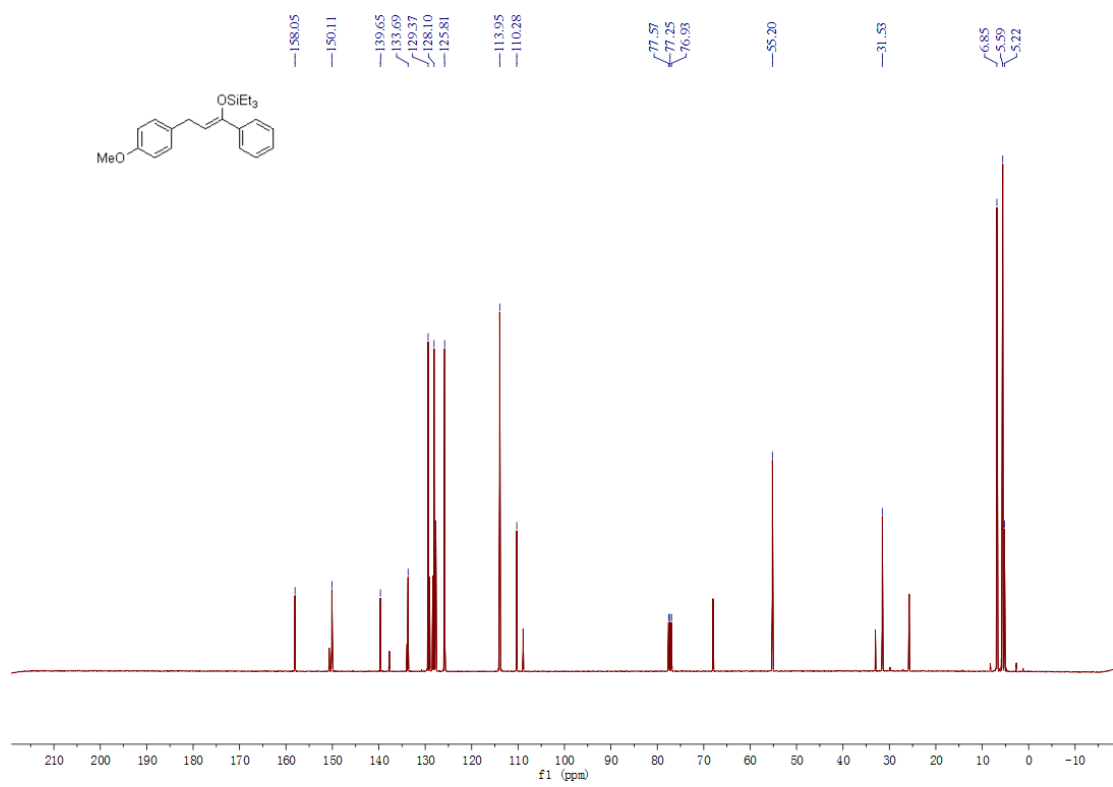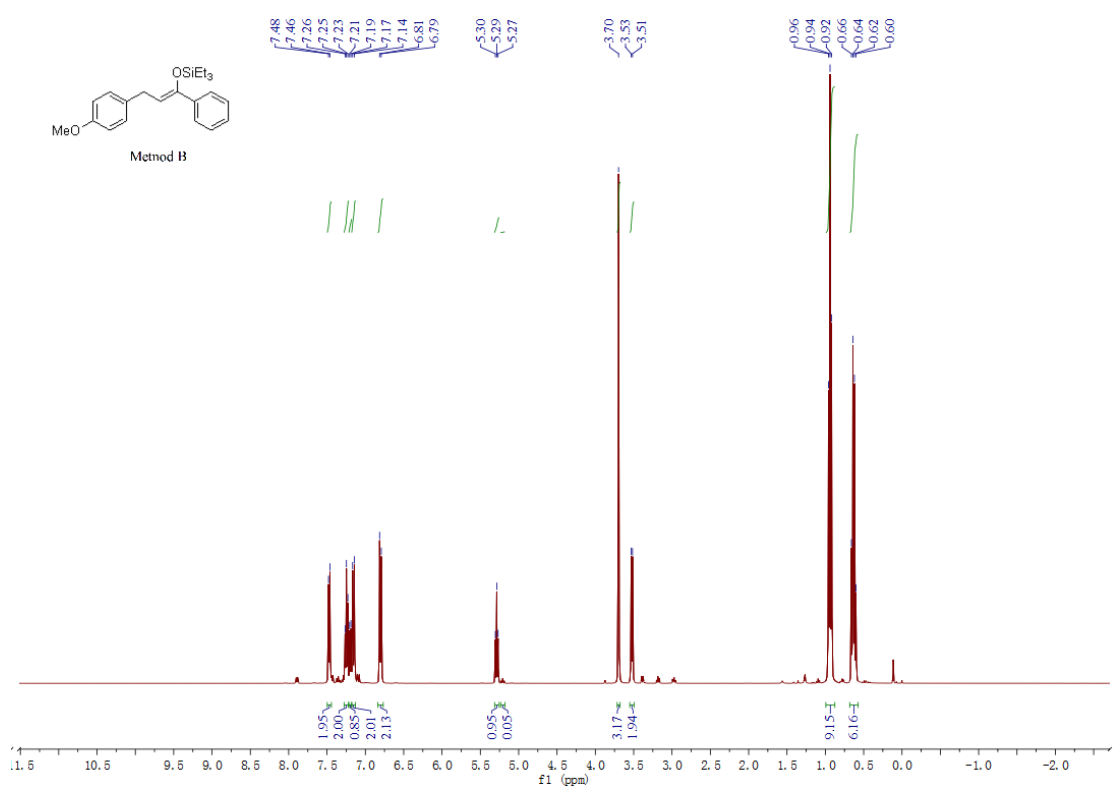

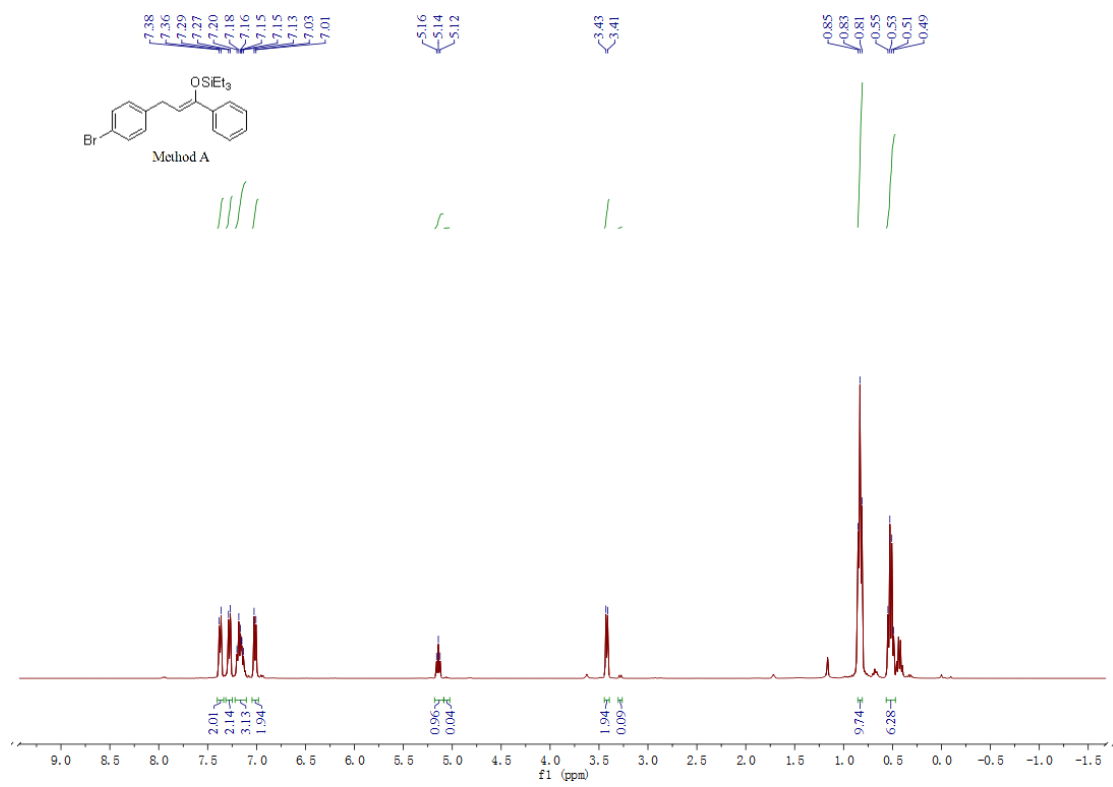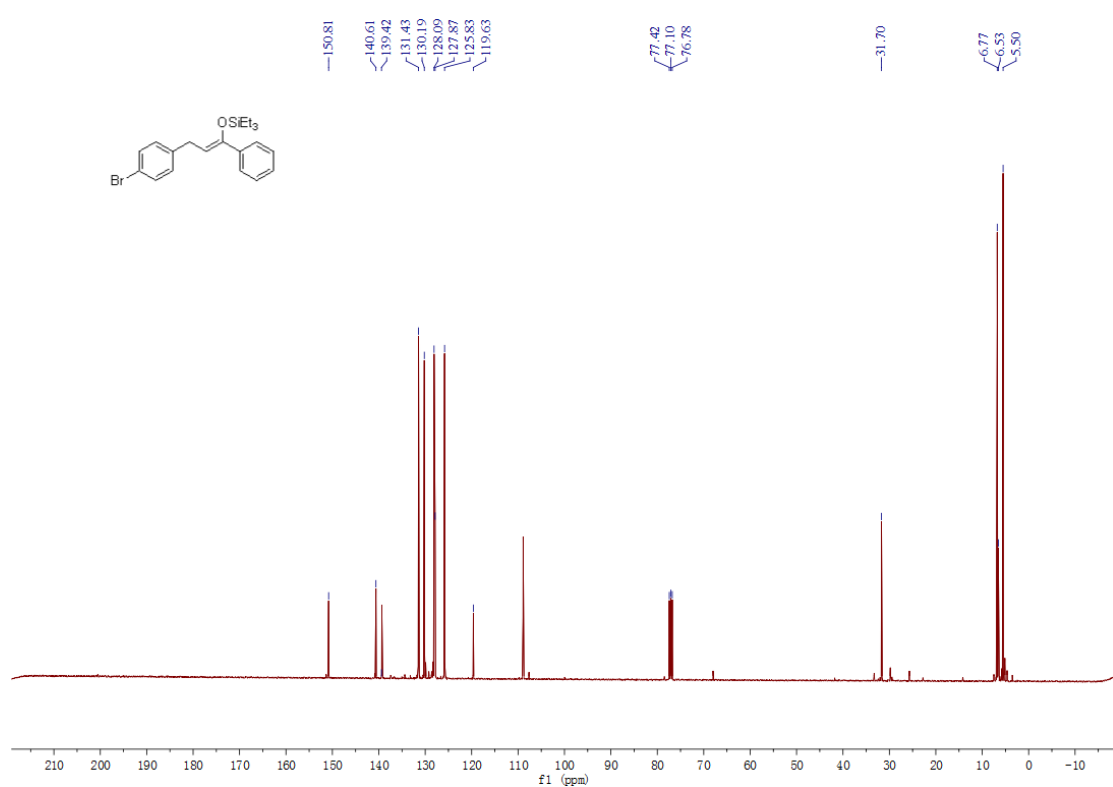

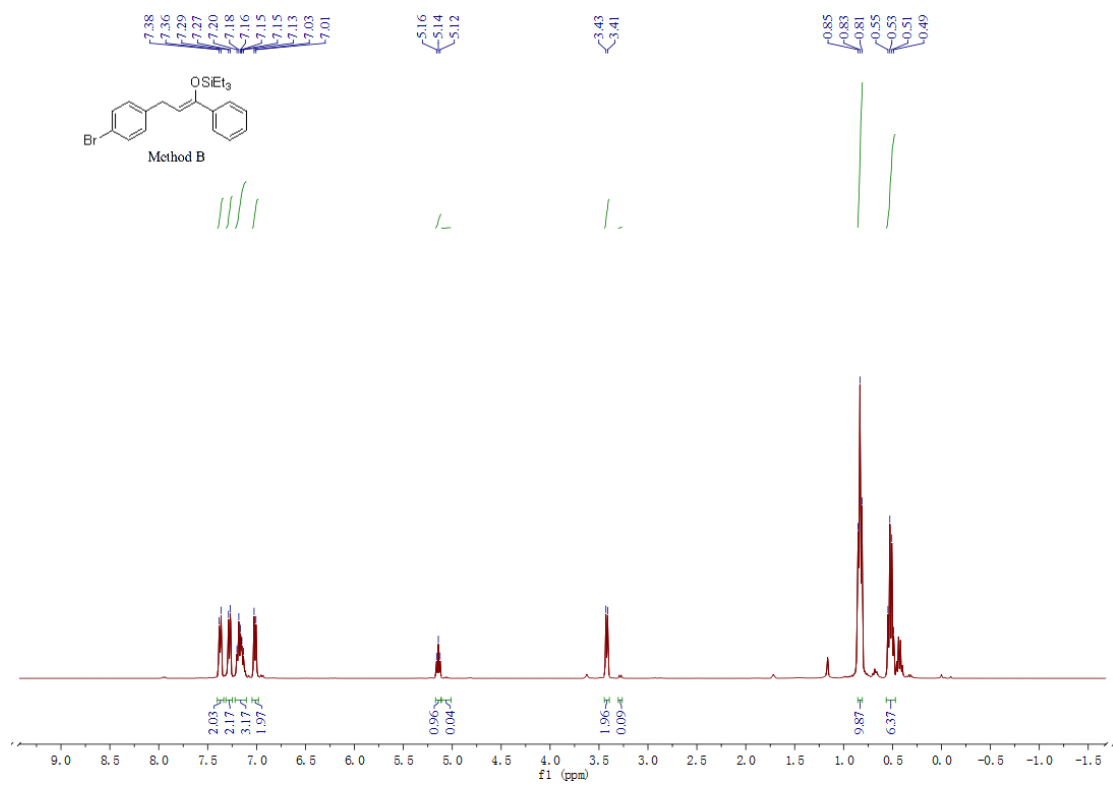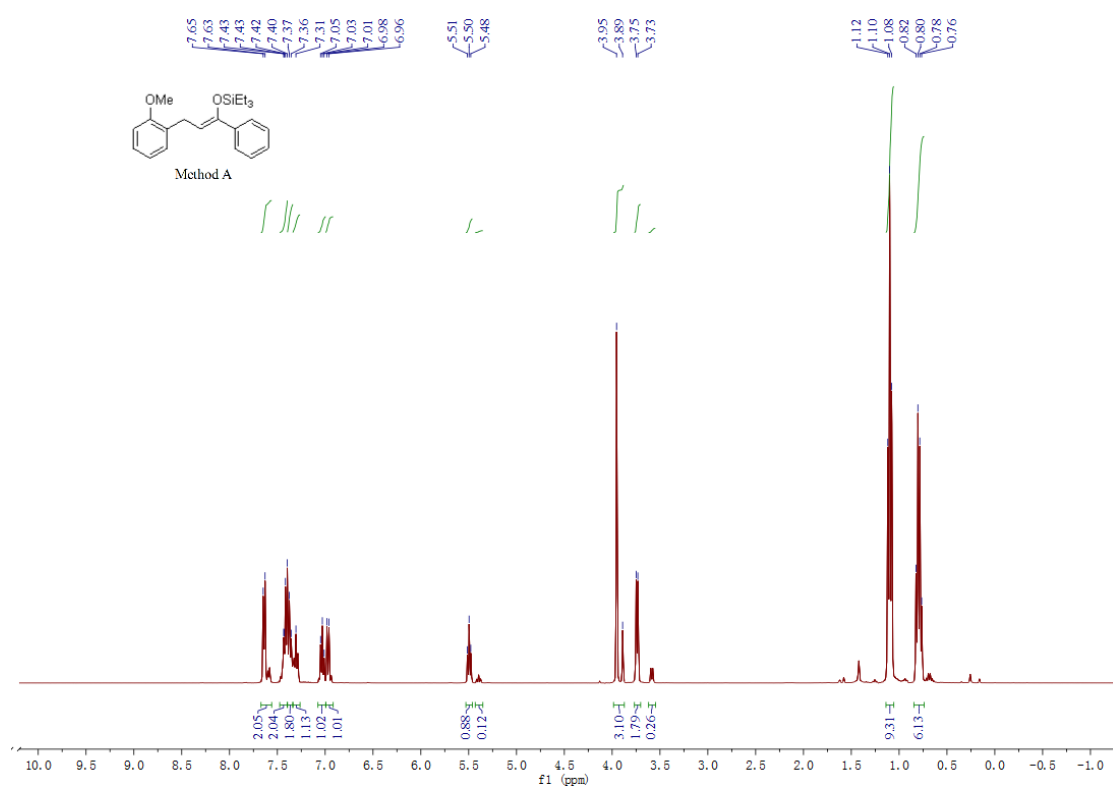

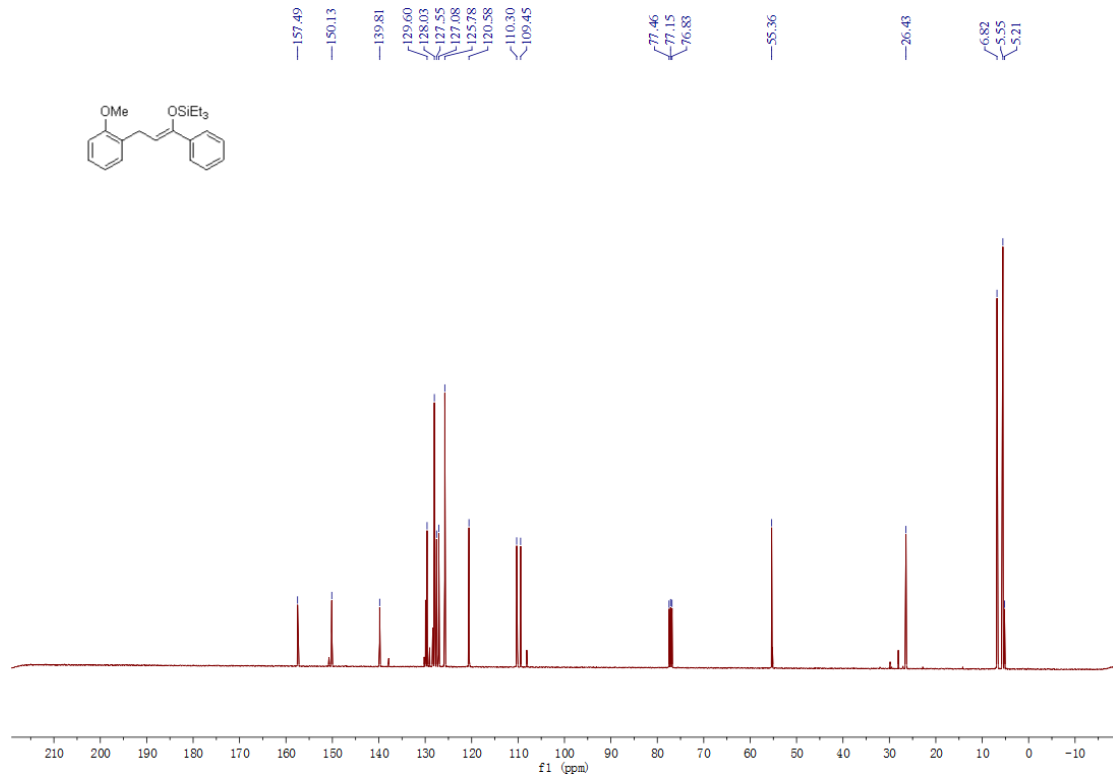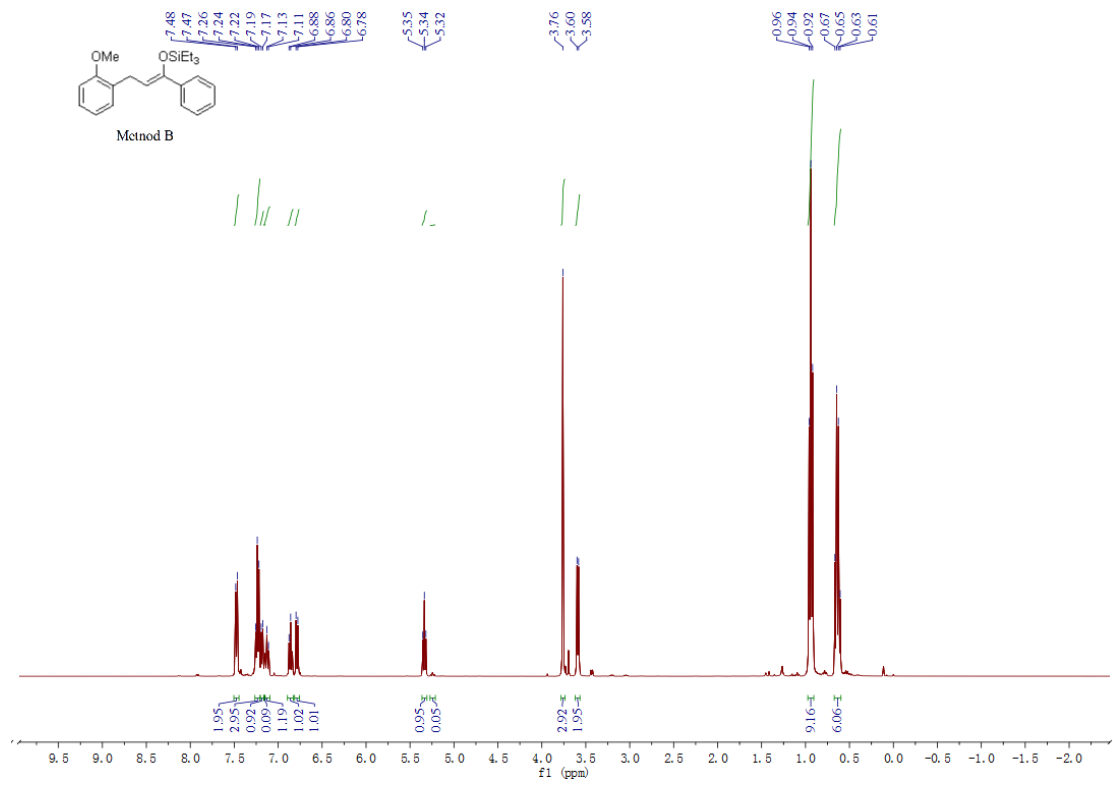

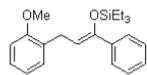

$^{29}\text{Si}$  NMR (99 MHz,  $\text{CDCl}_3$ )  $\delta$  20.82 (s), 20.13 (s).

20.82  
20.13

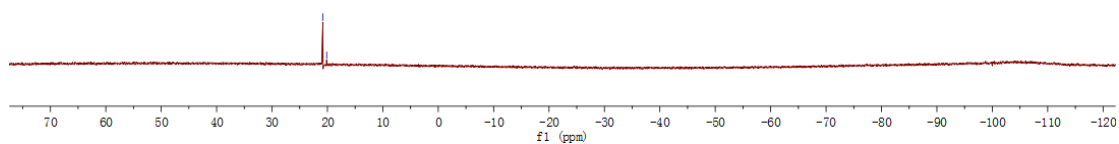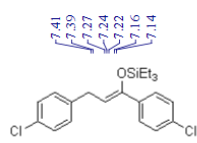

Method A

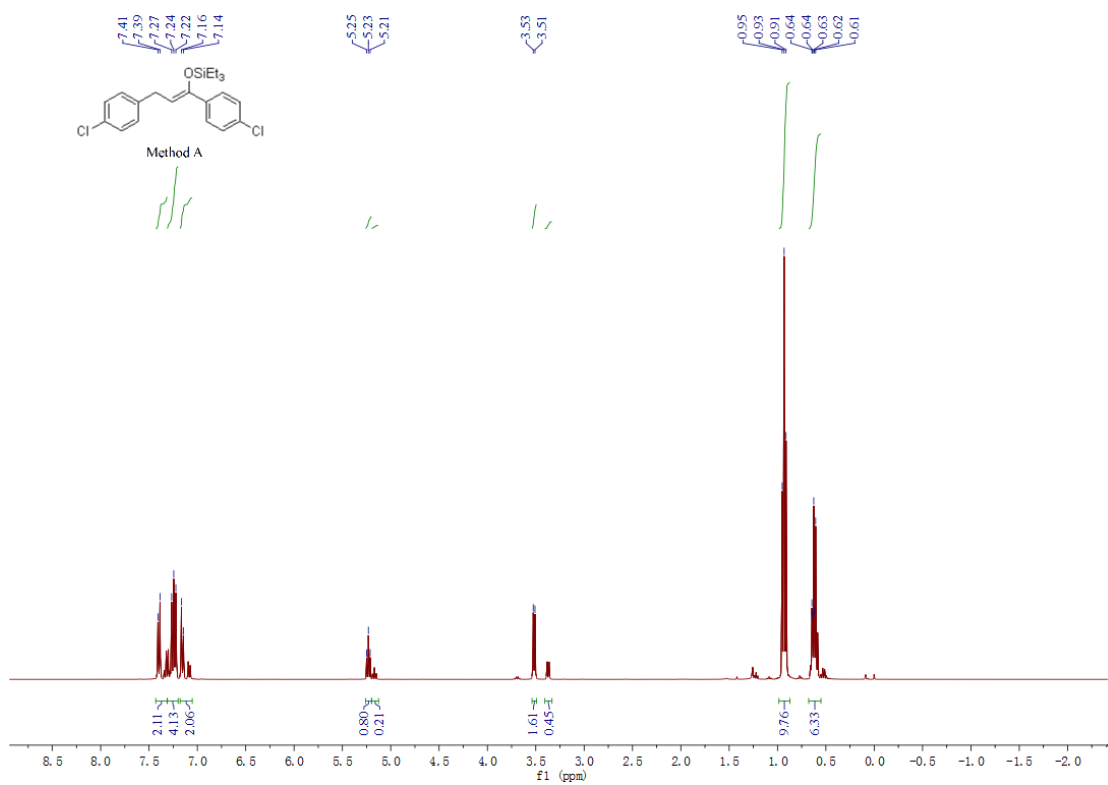

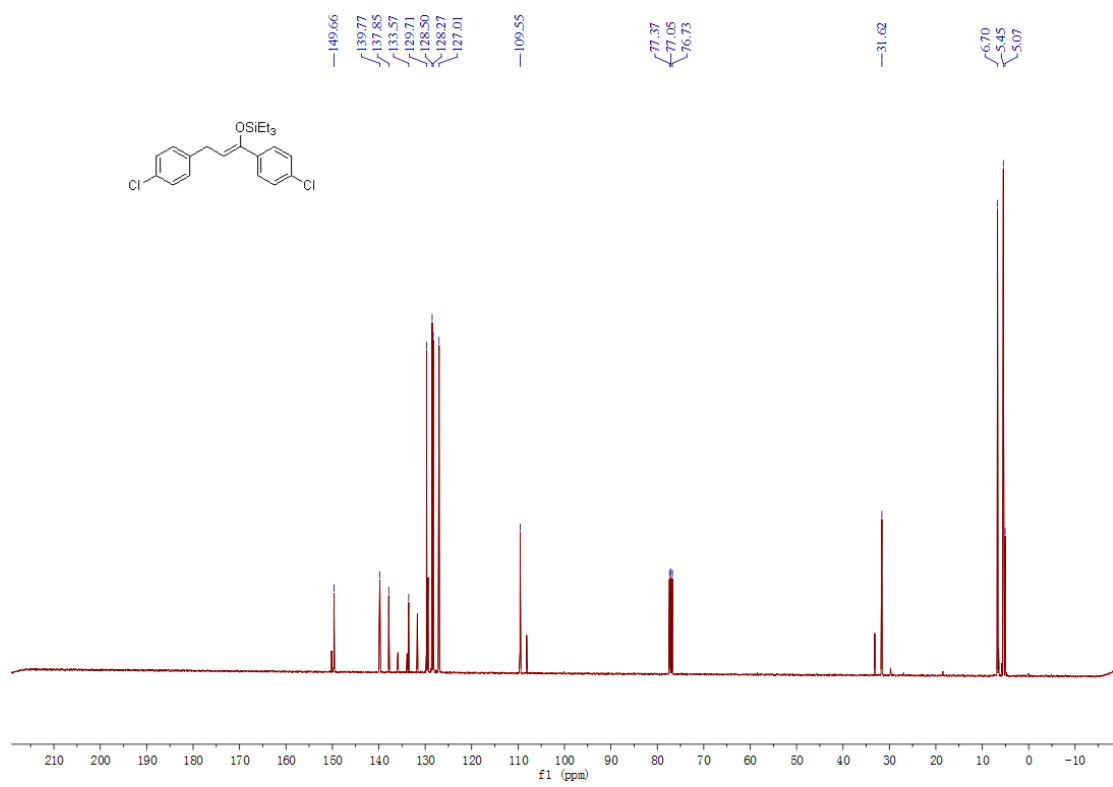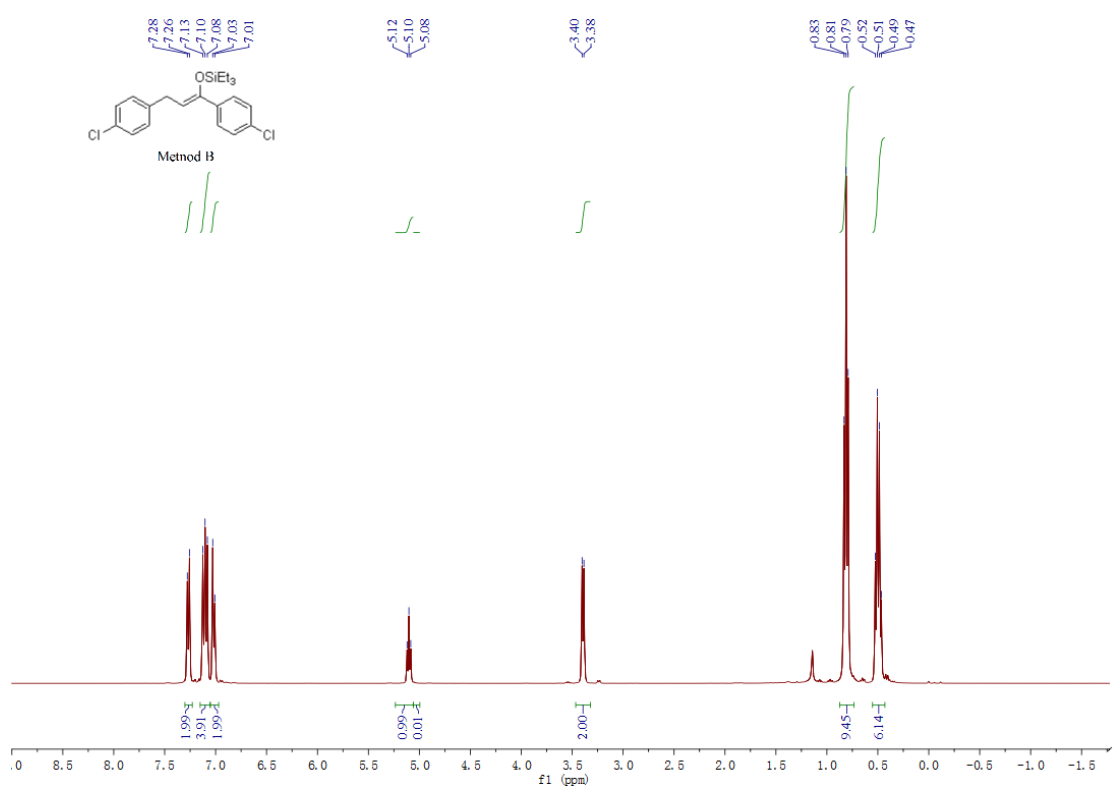



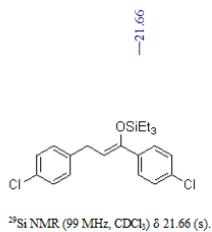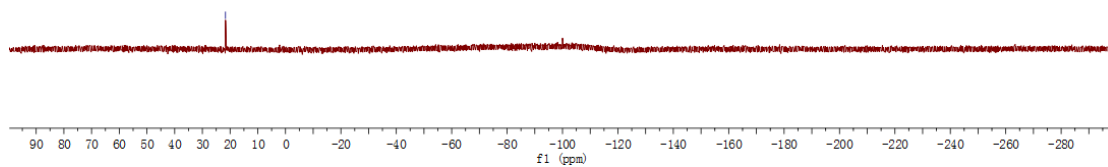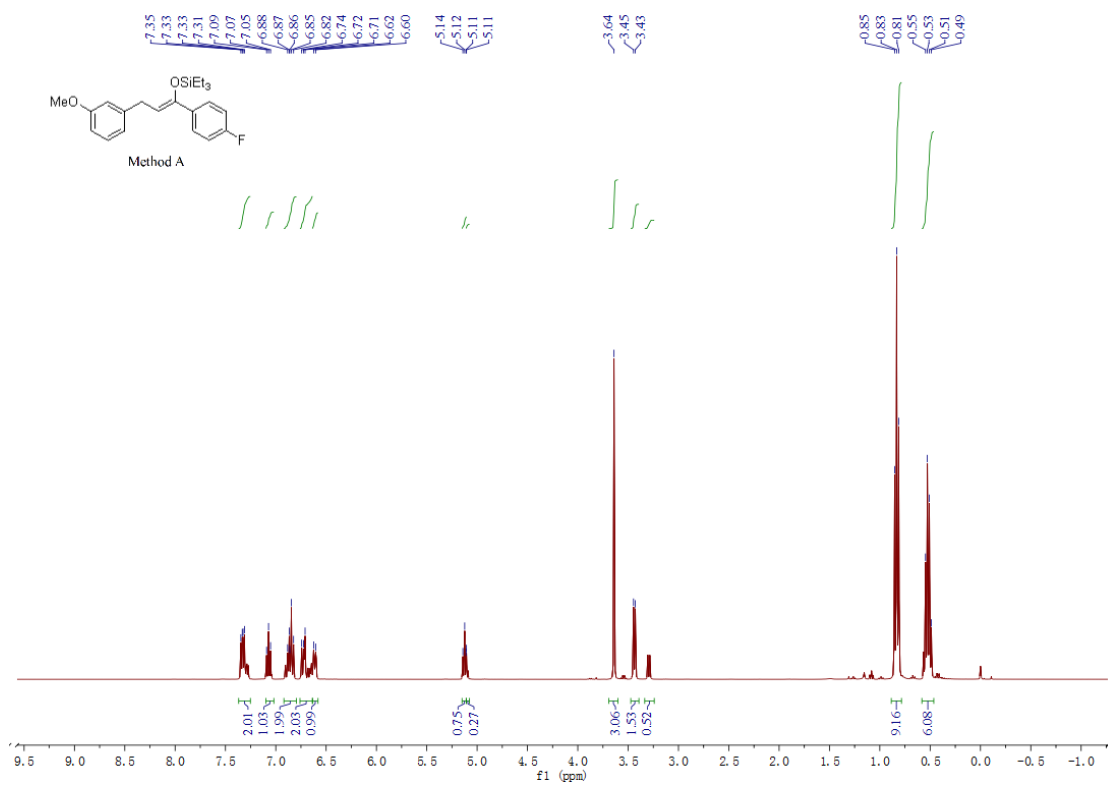

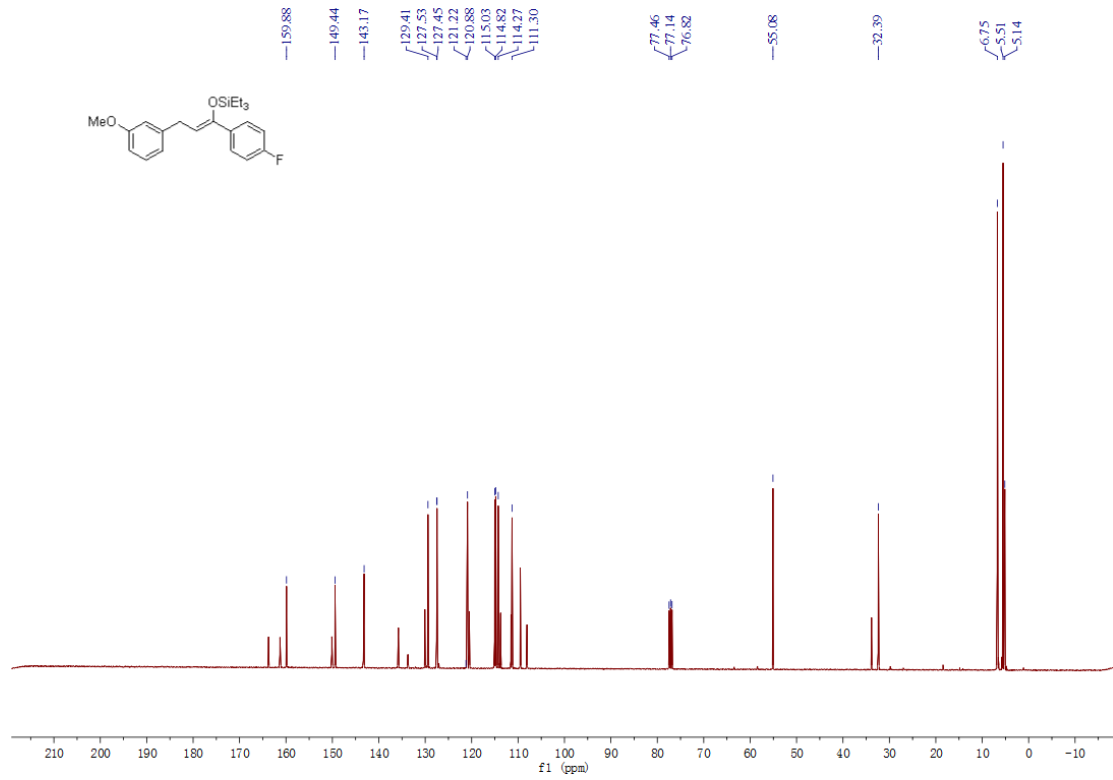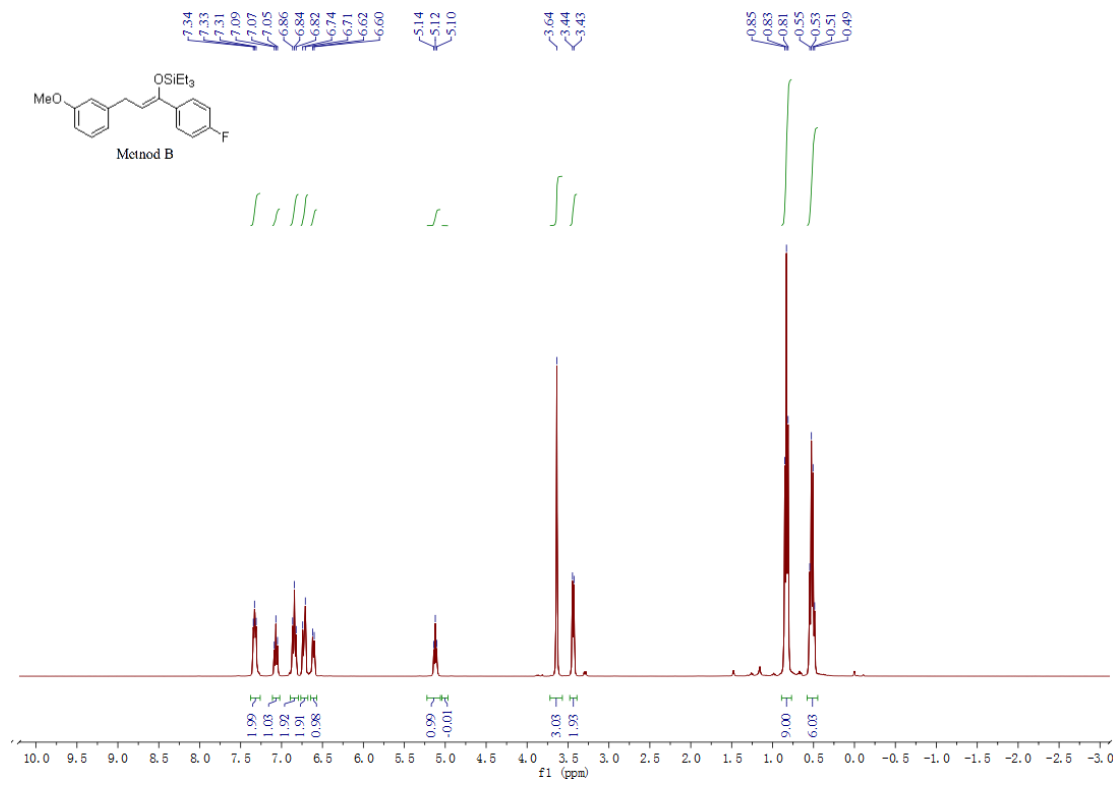

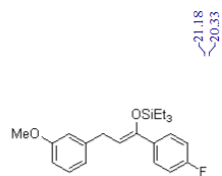

<sup>29</sup>Si NMR (99 MHz, CDCl<sub>3</sub>) δ 21.18 (s), 20.33 (s).

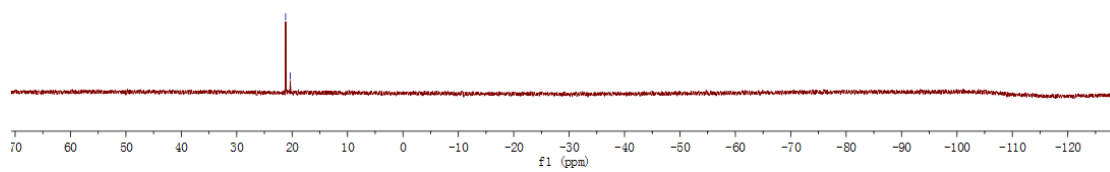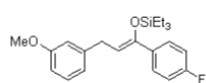

<sup>19</sup>F NMR (471 MHz, CDCl<sub>3</sub>) δ -113.26 (s), -114.29 (s).

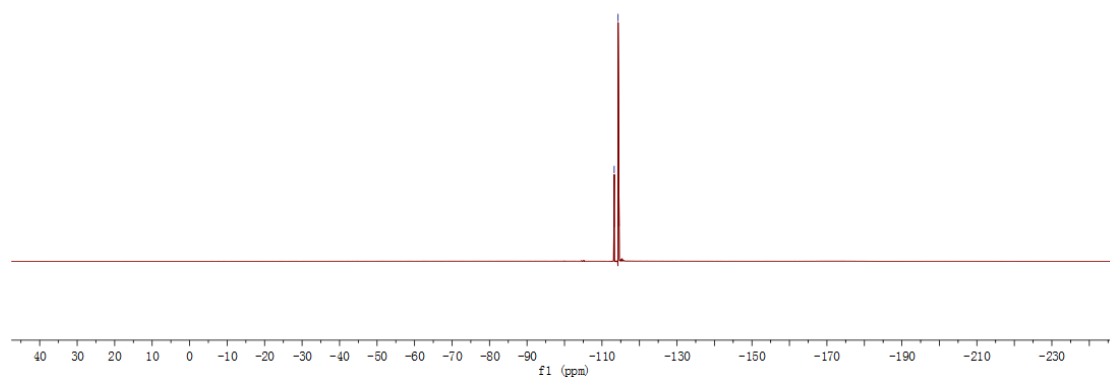

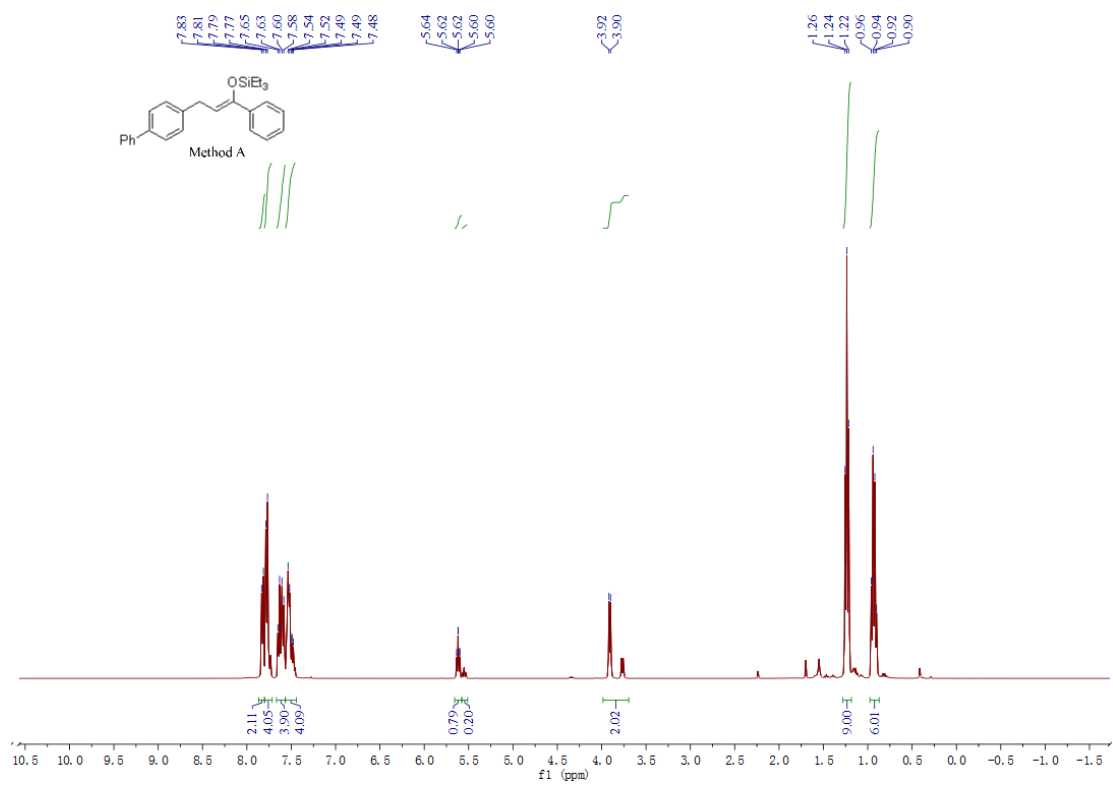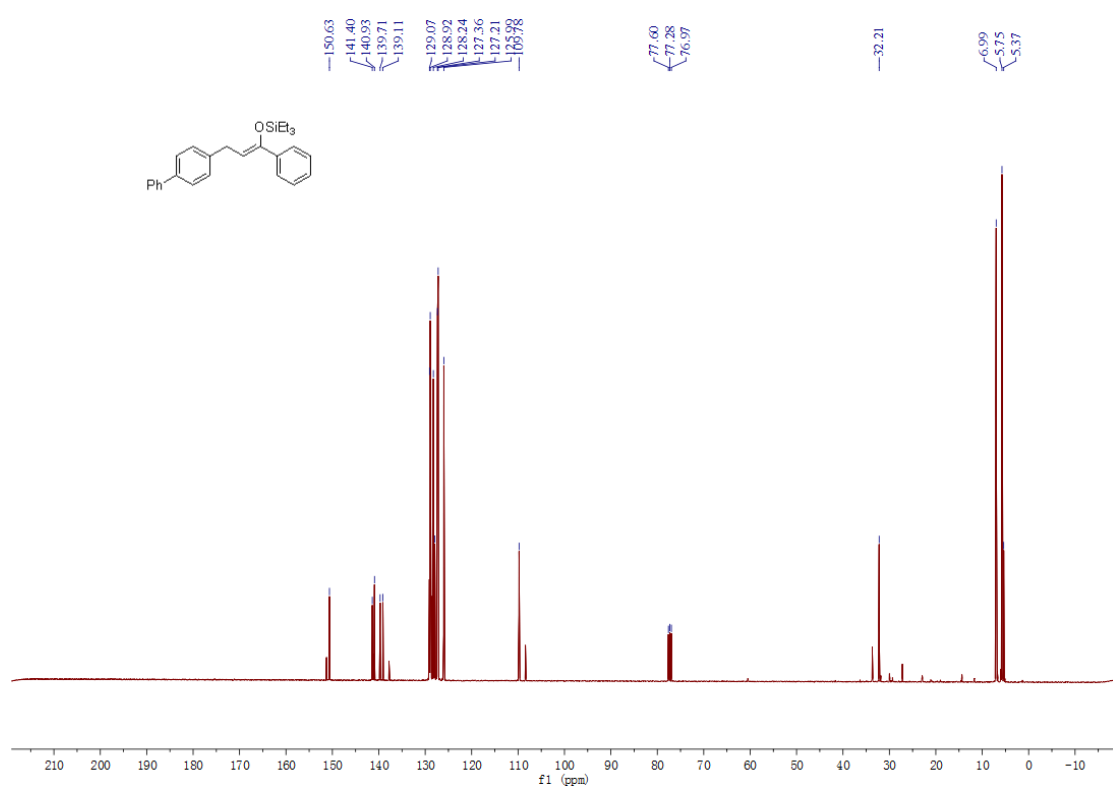

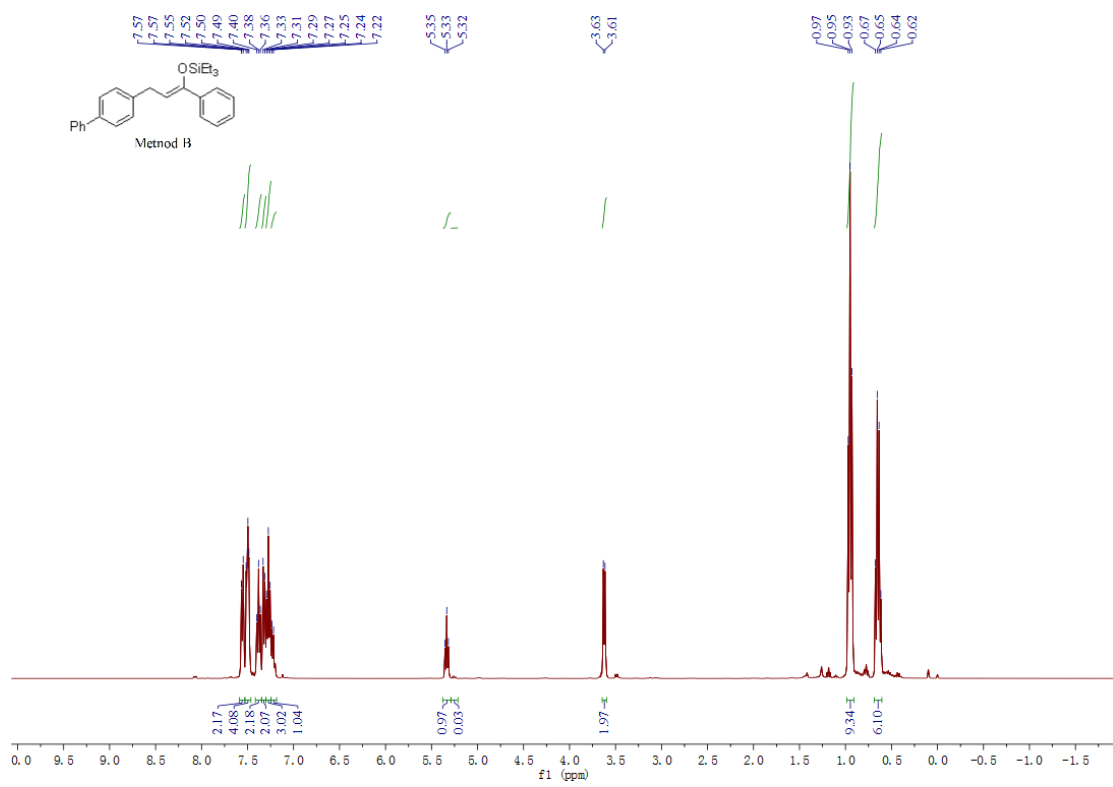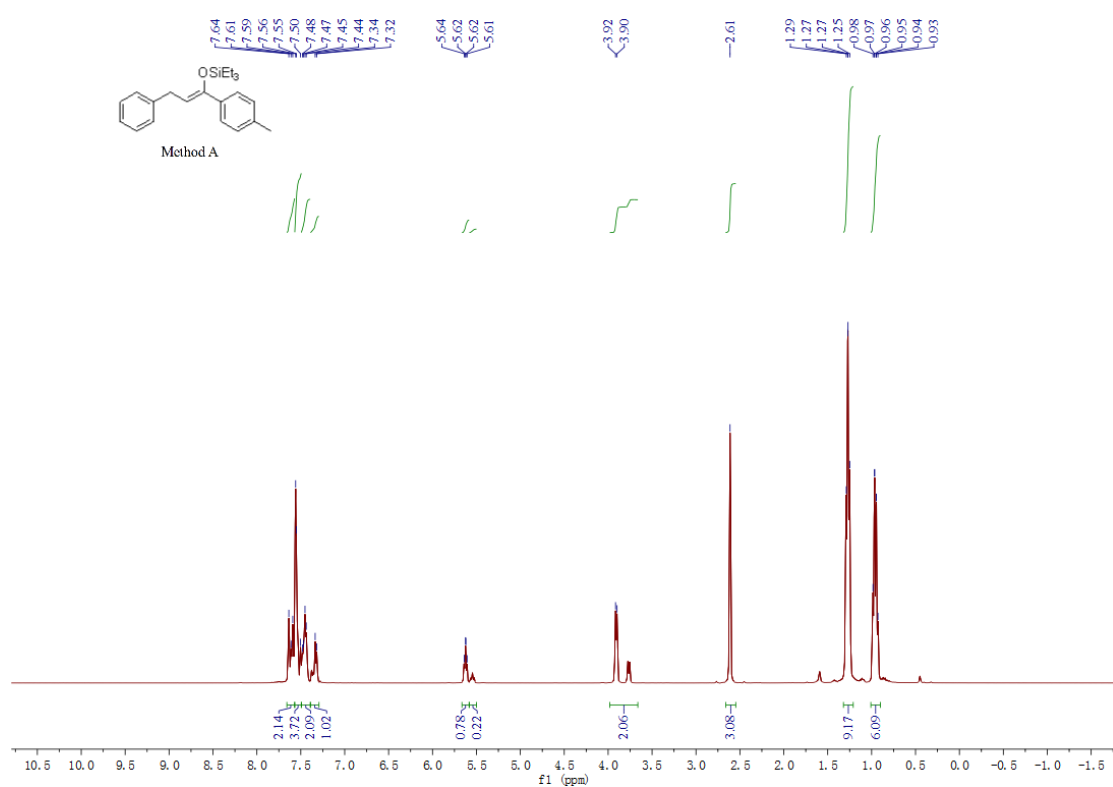

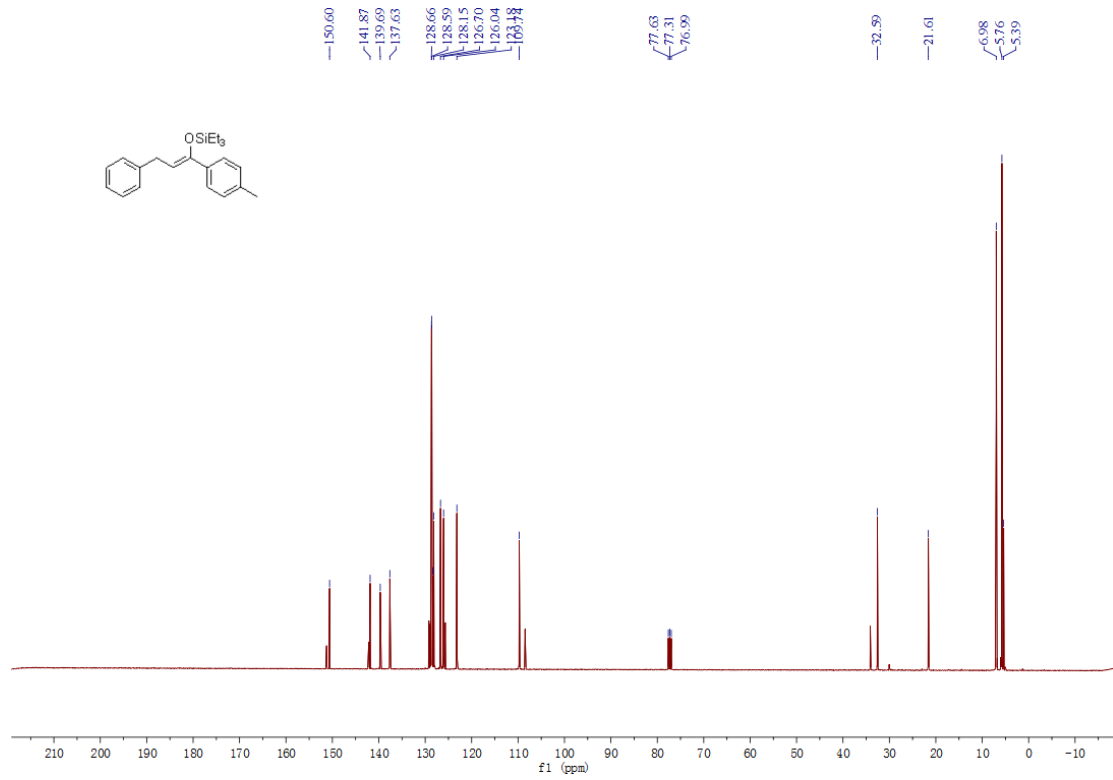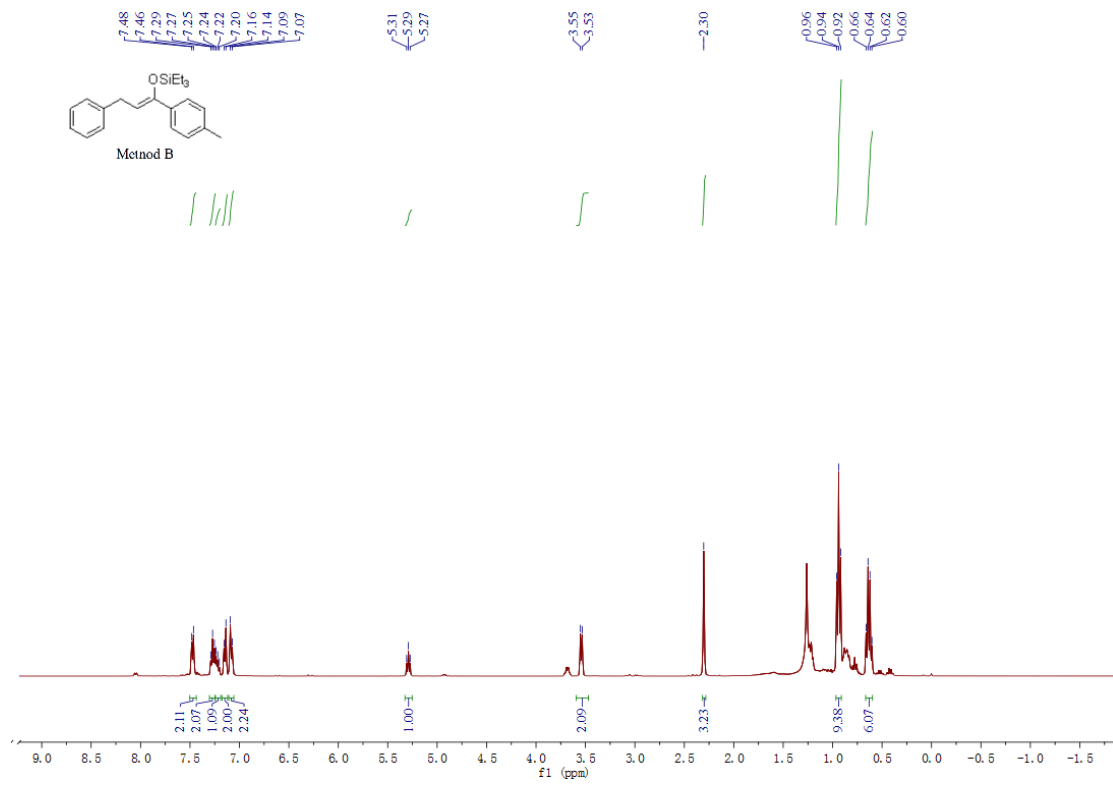

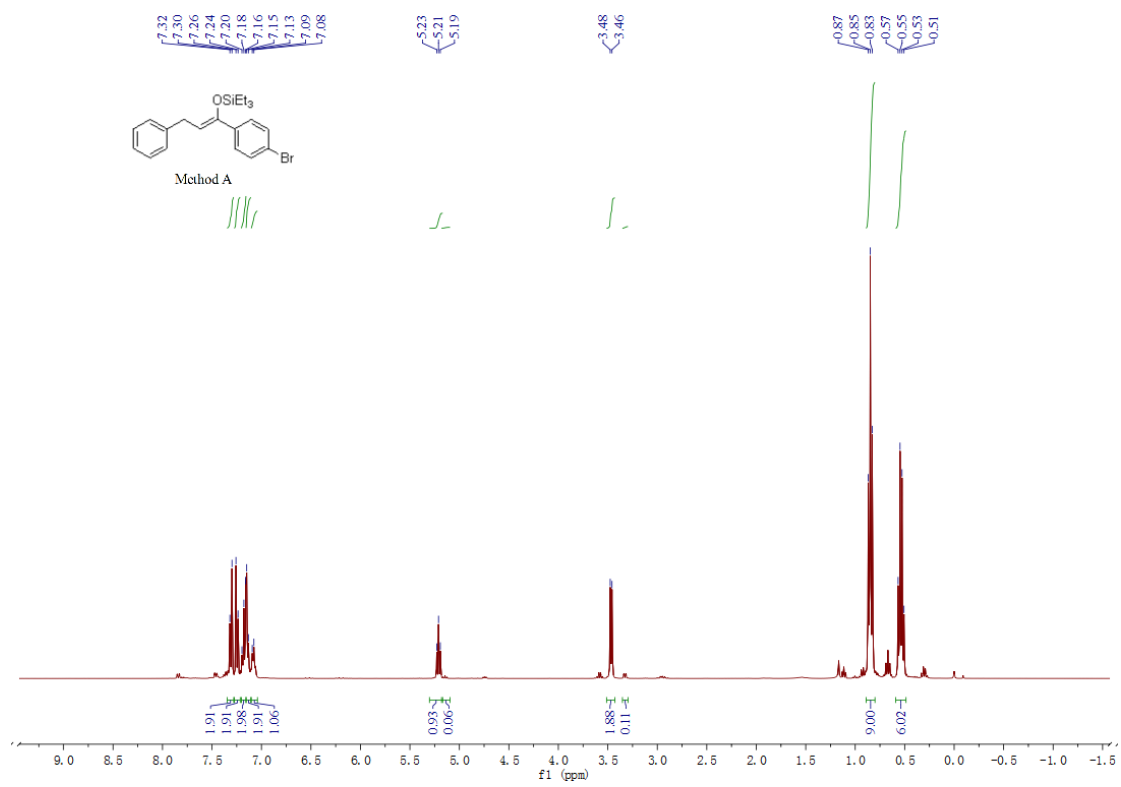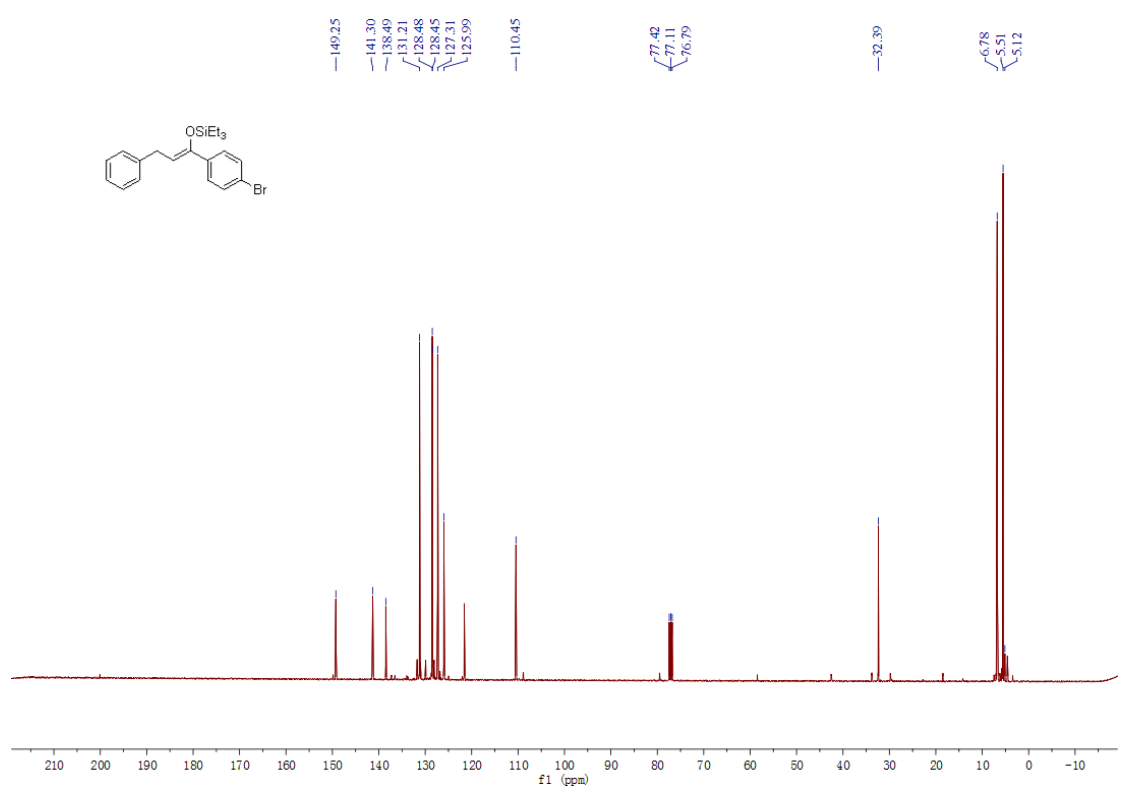

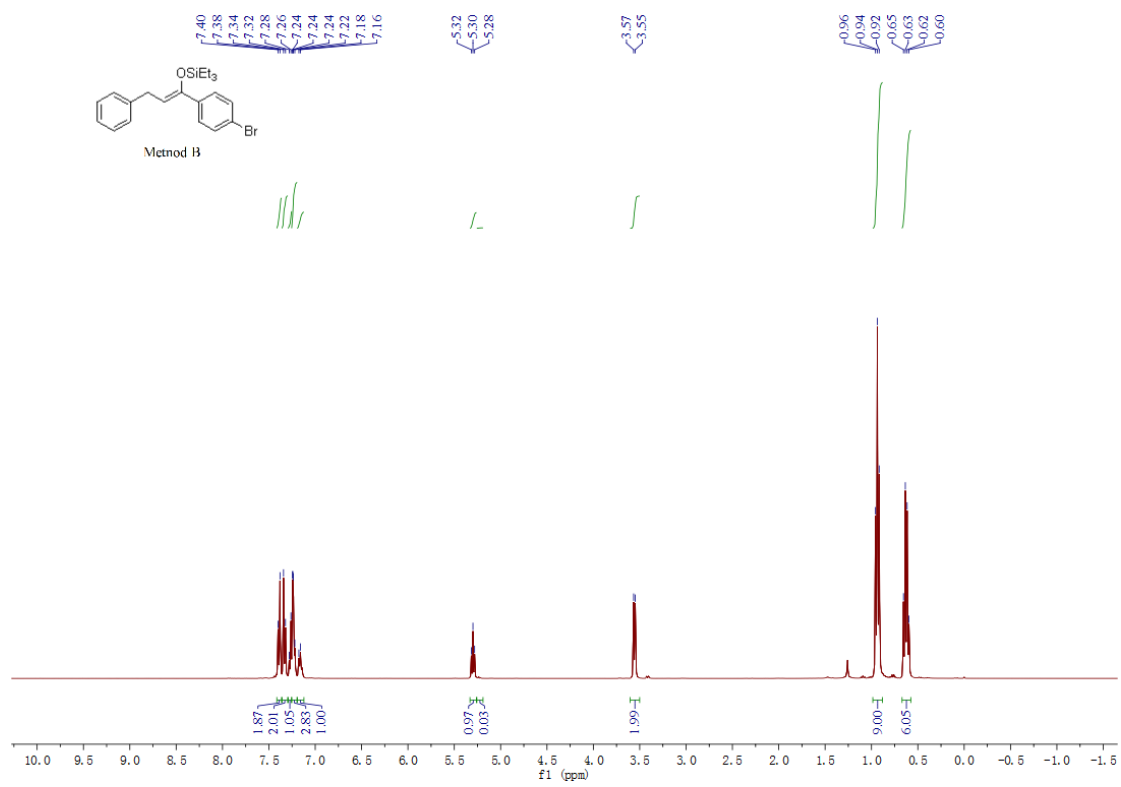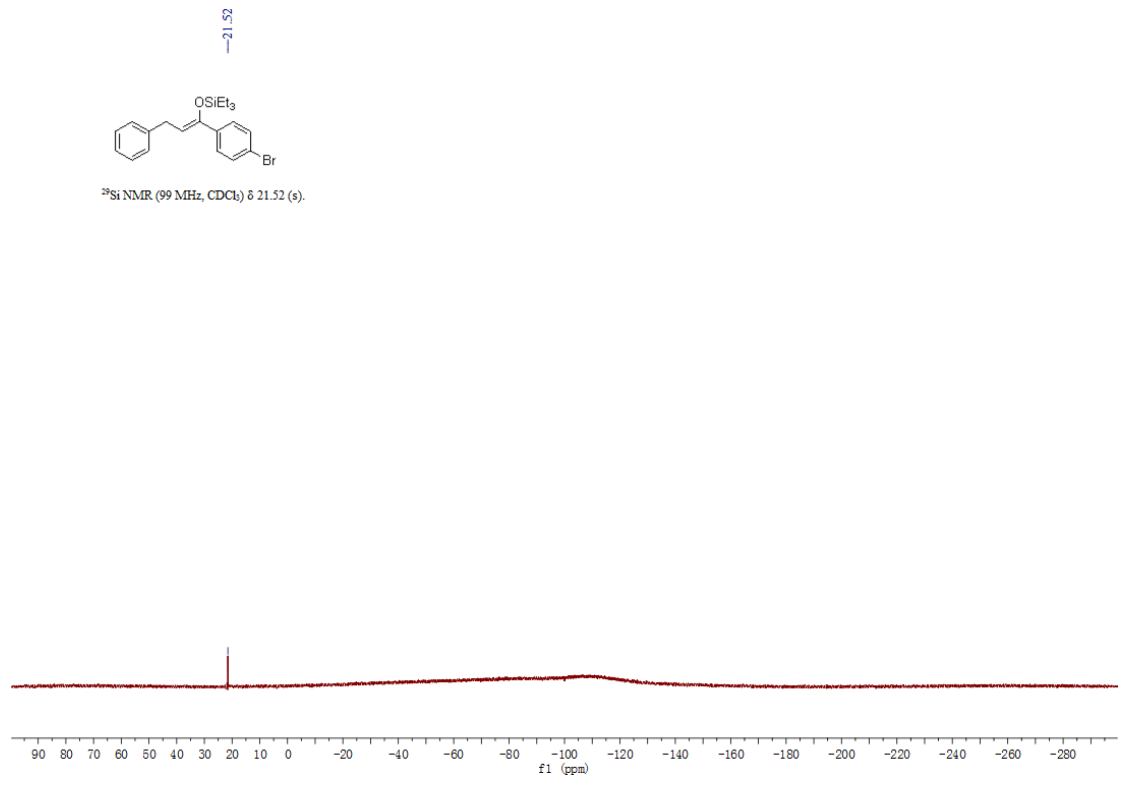



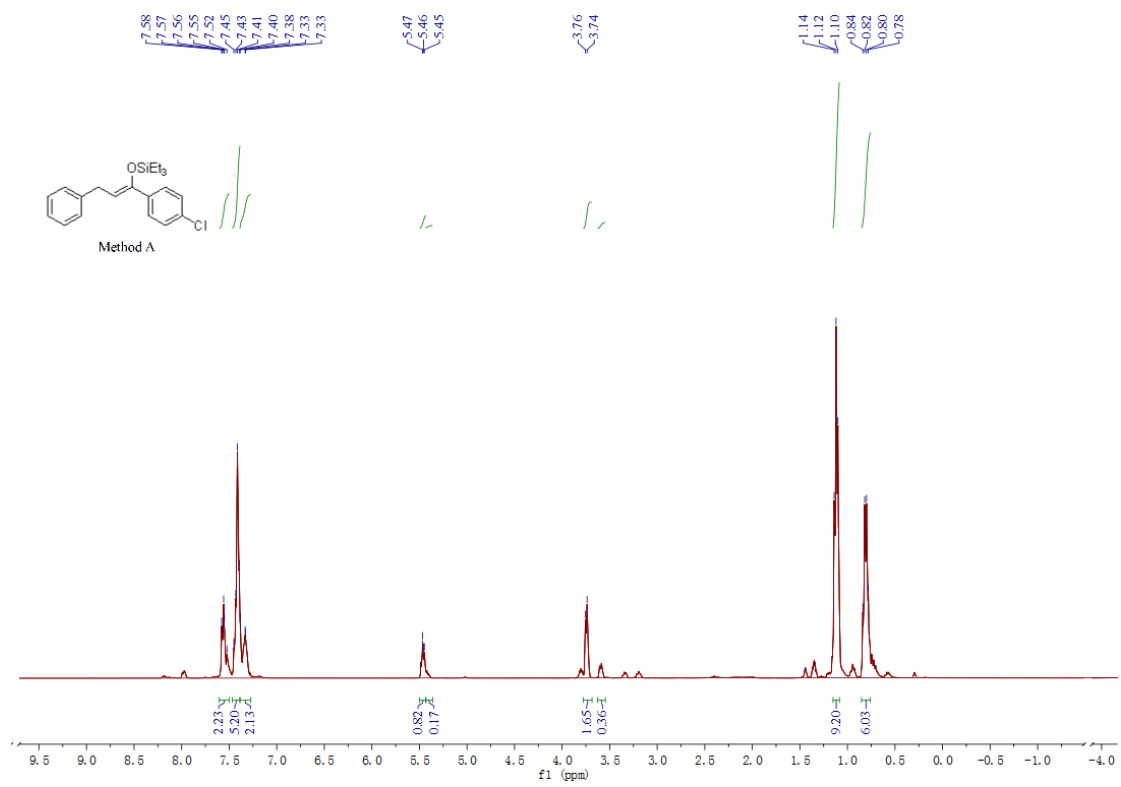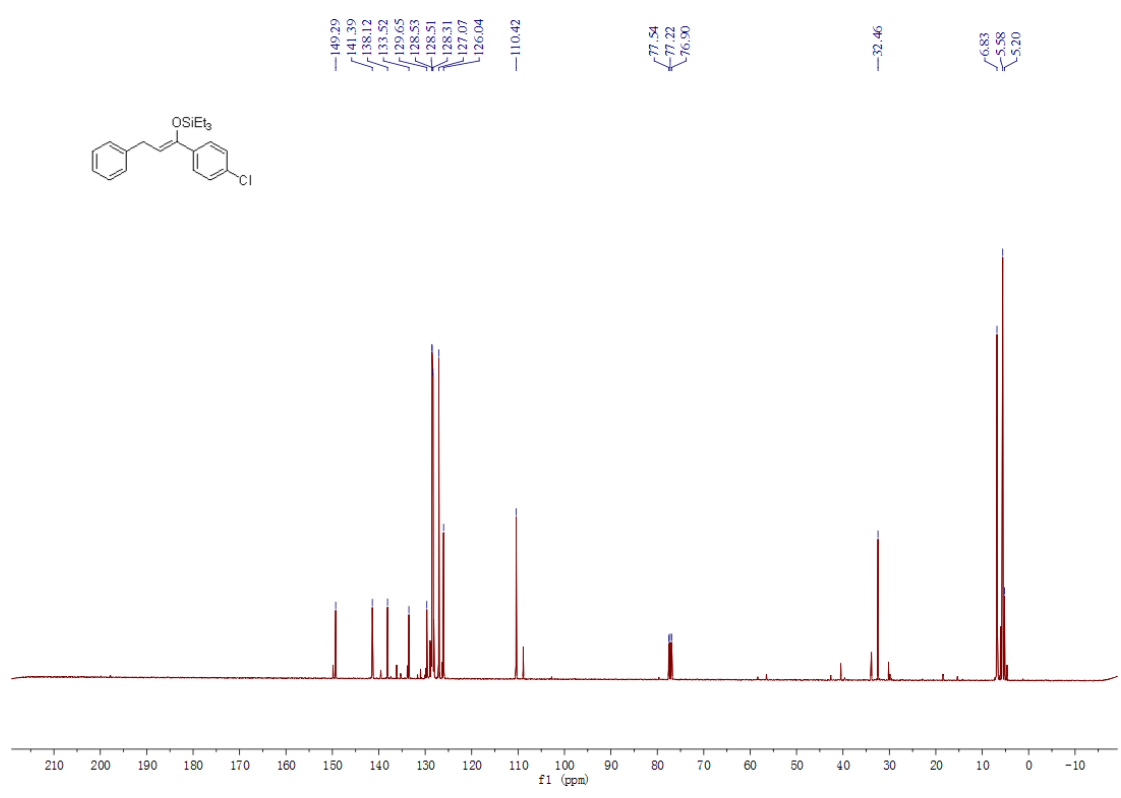

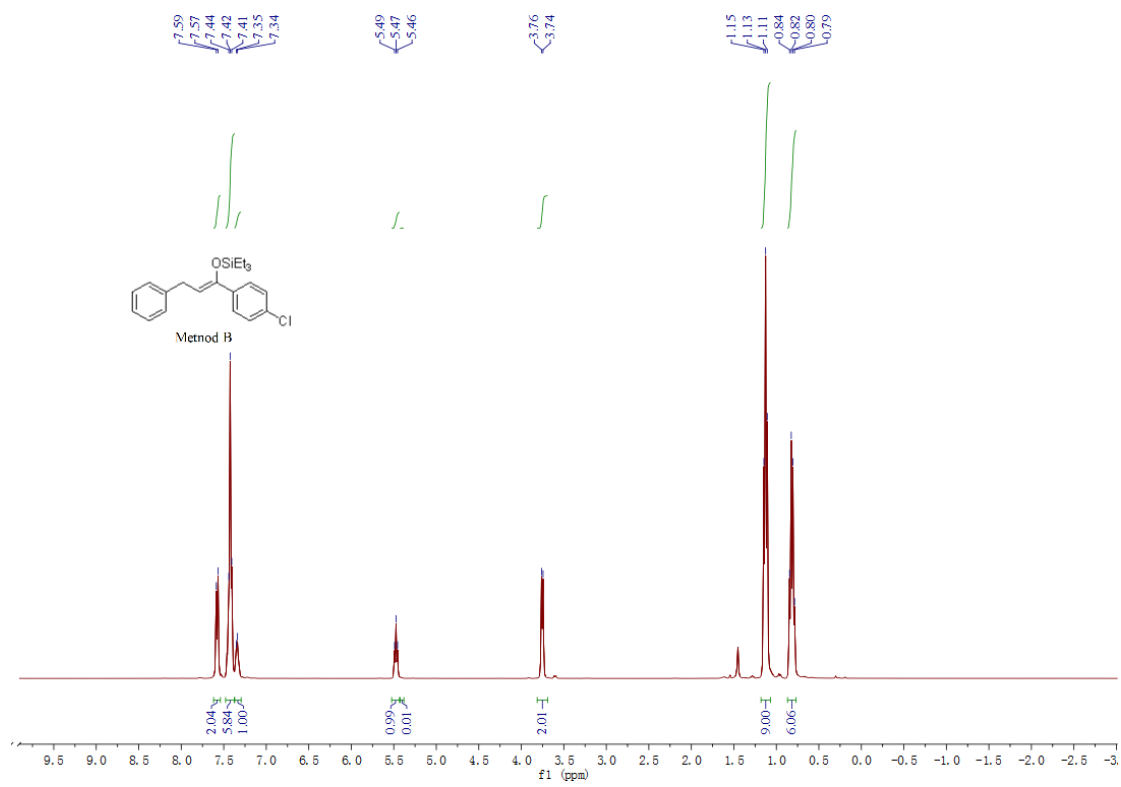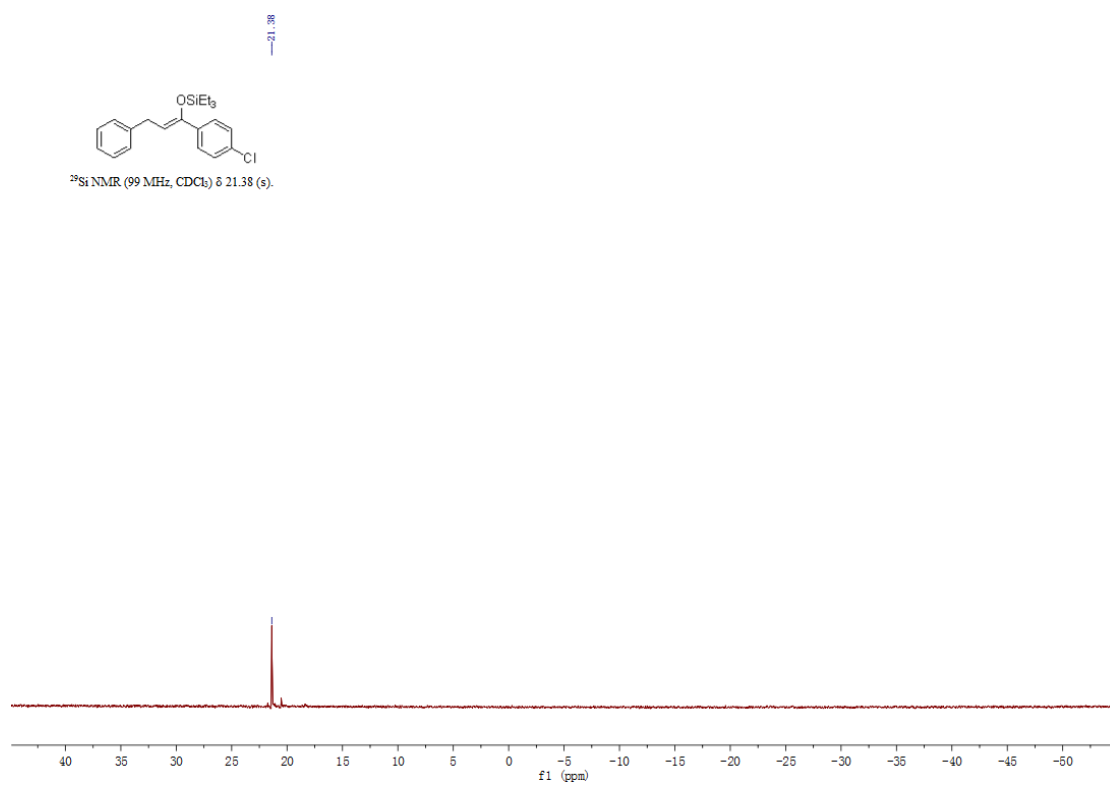

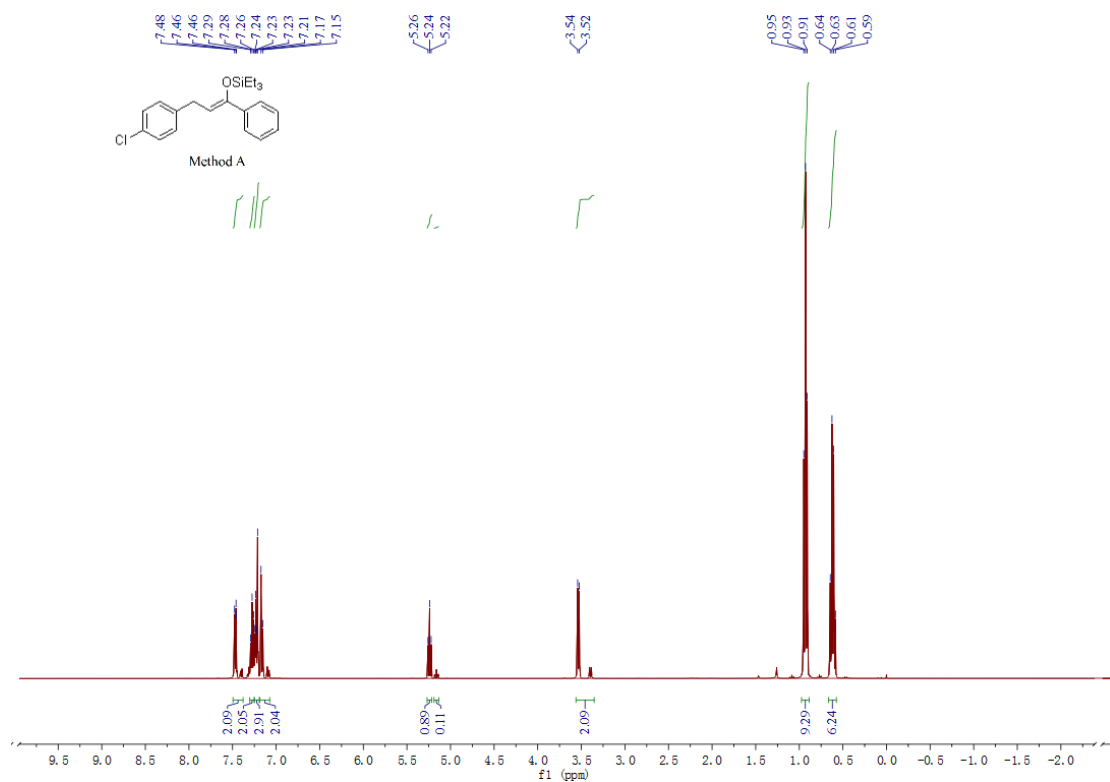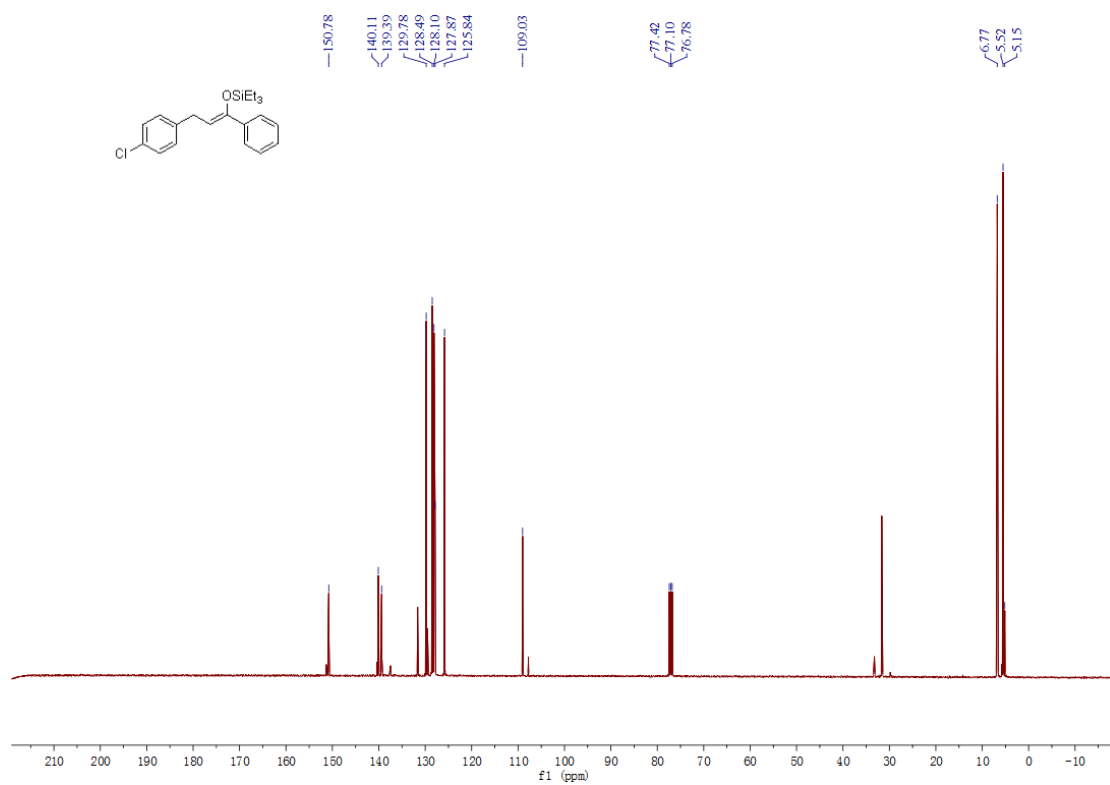

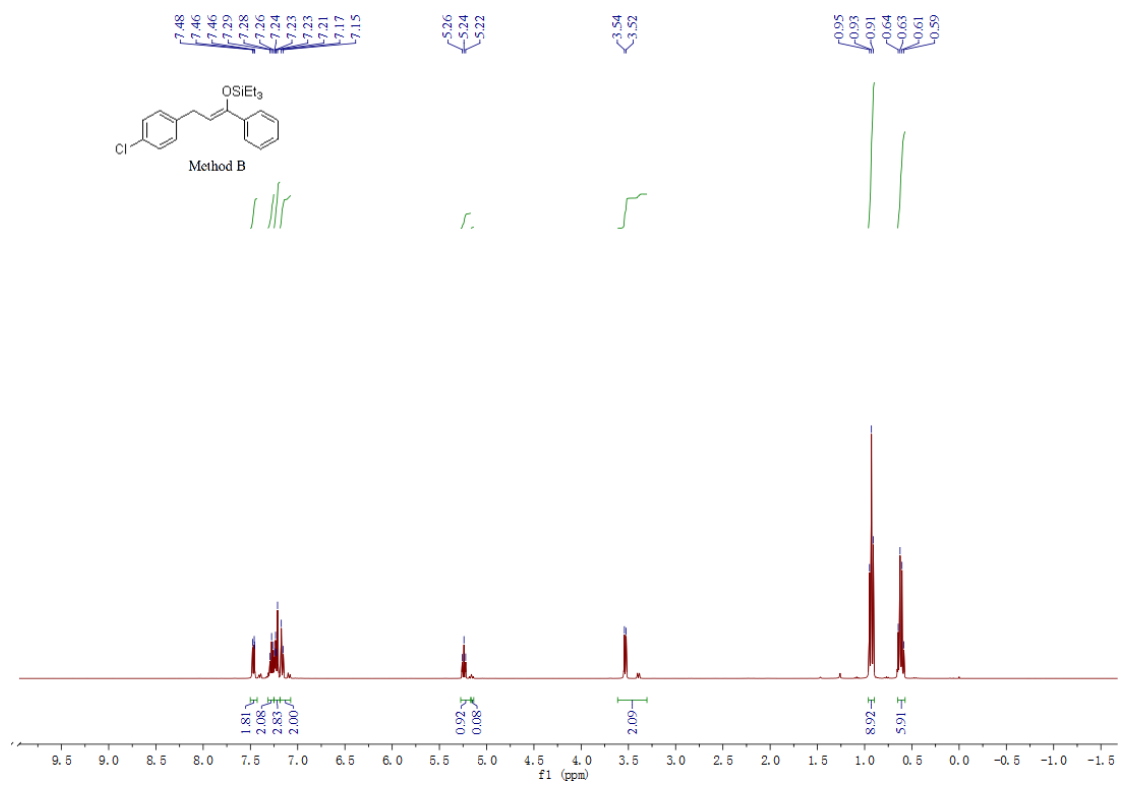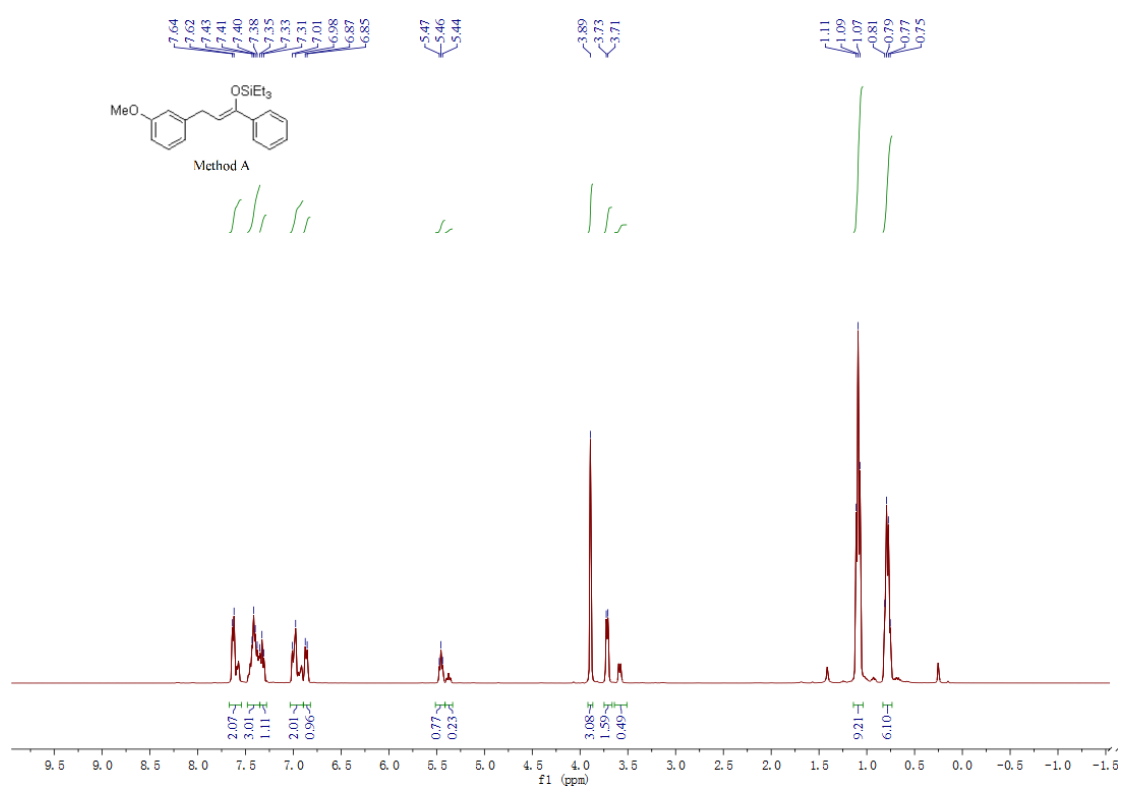

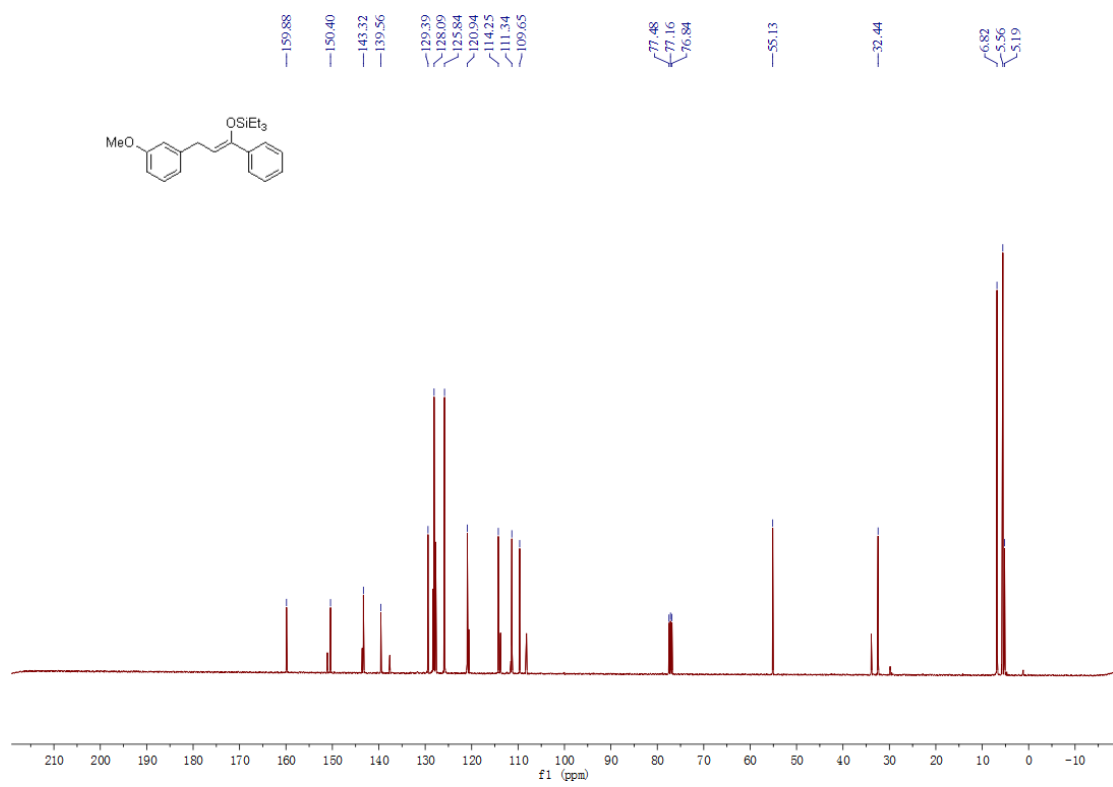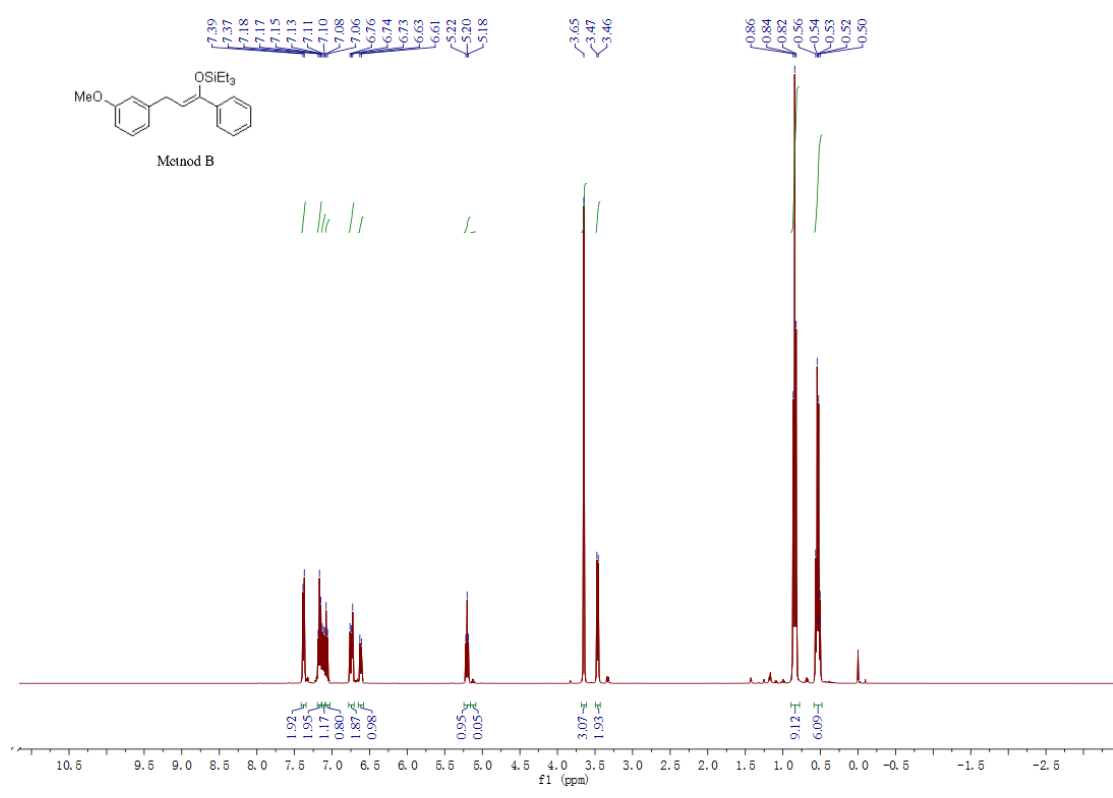

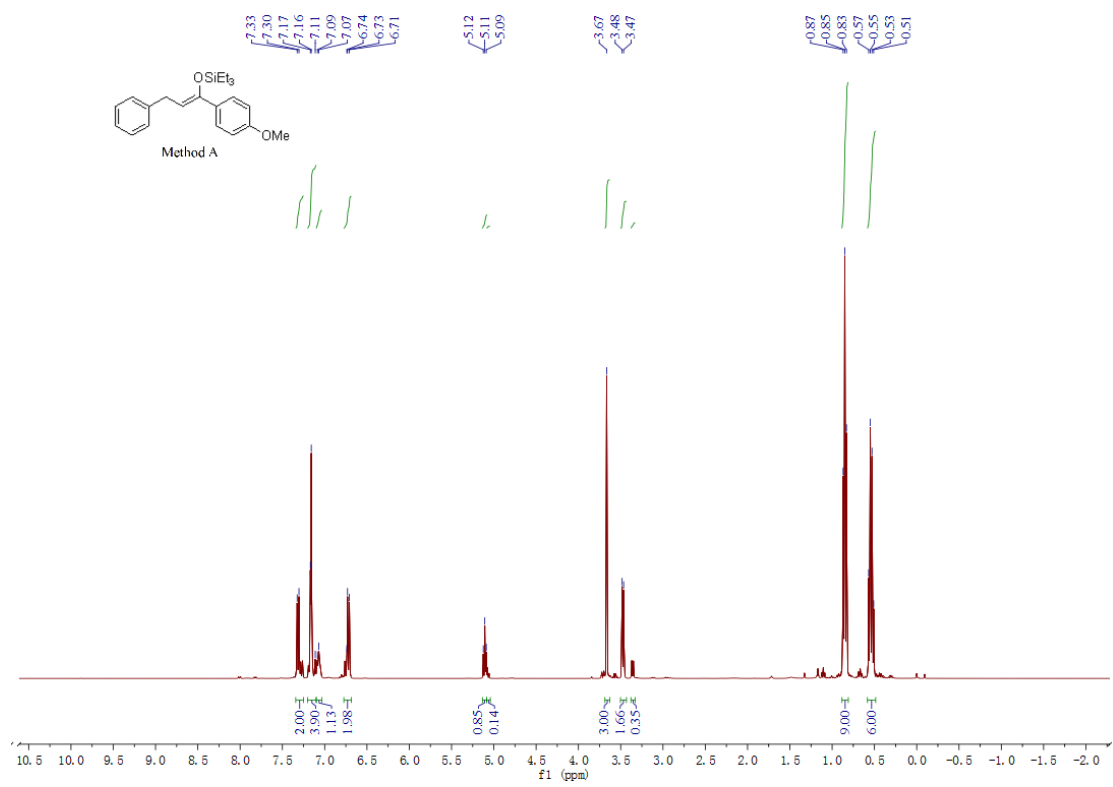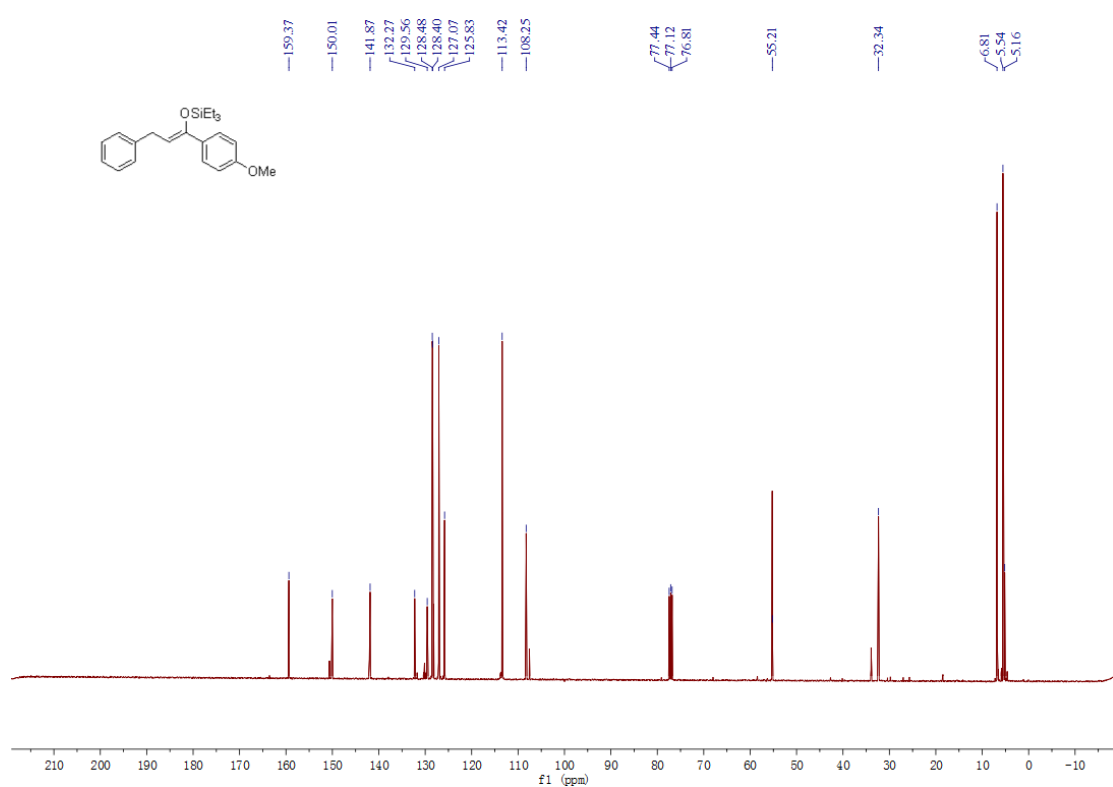

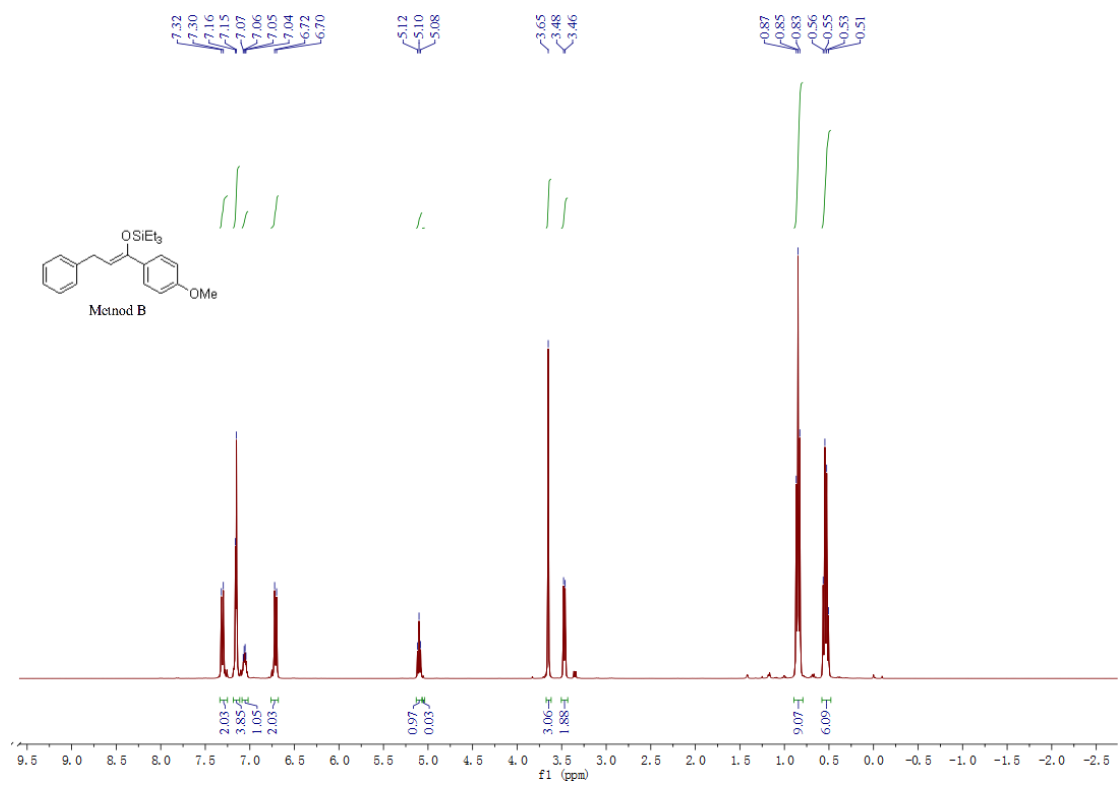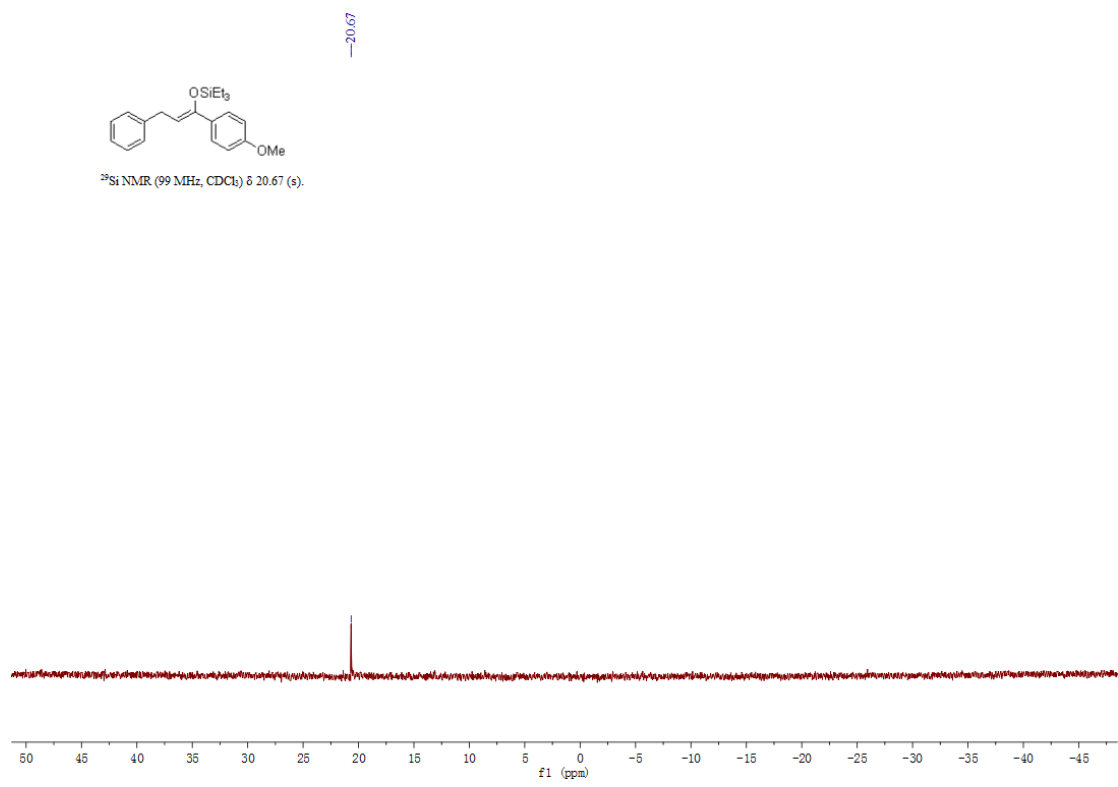

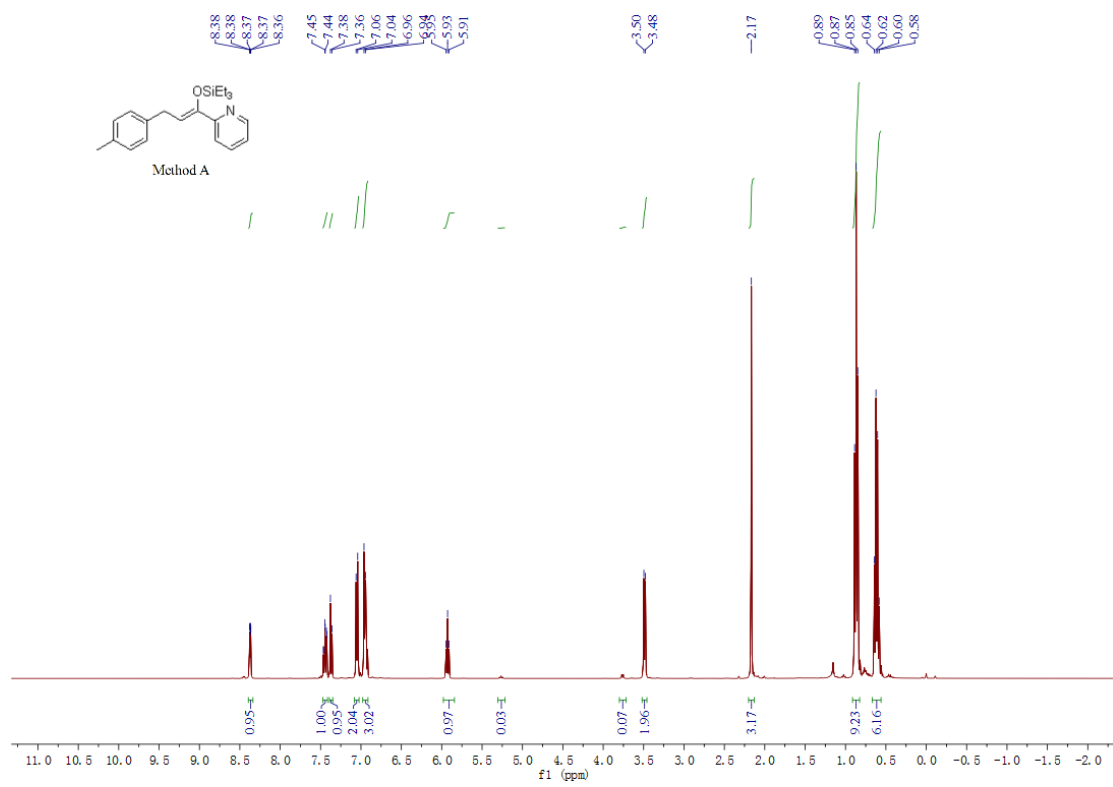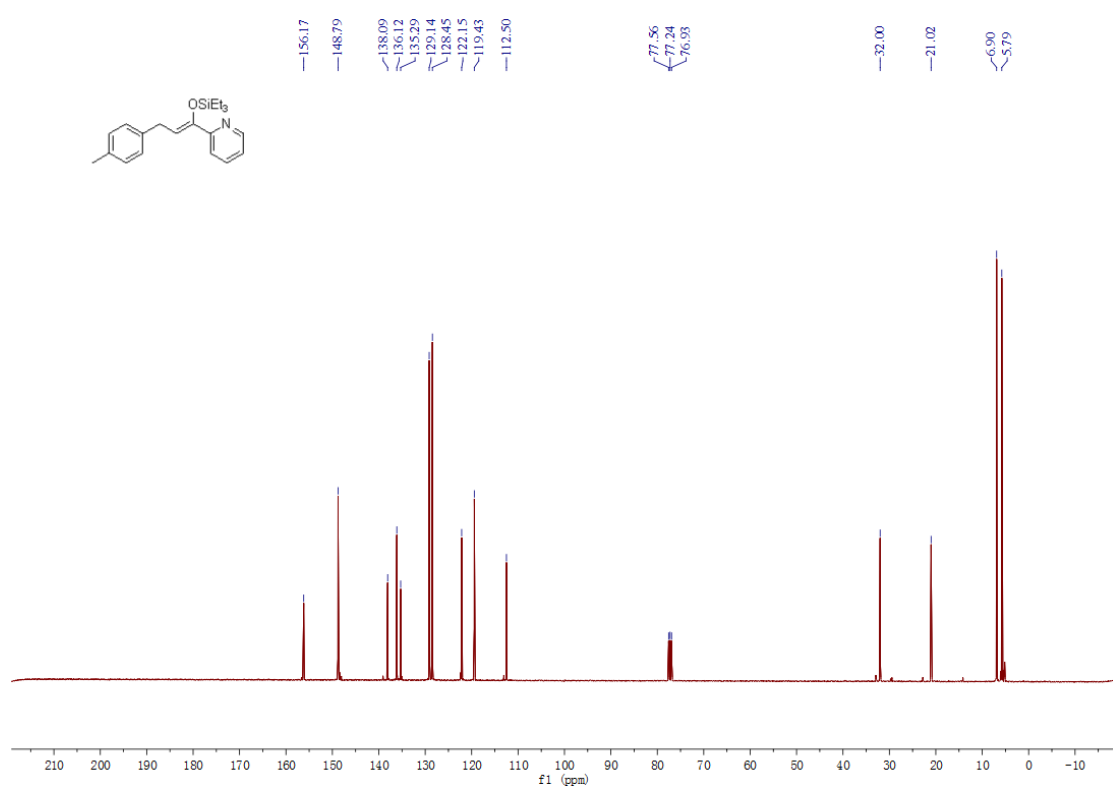



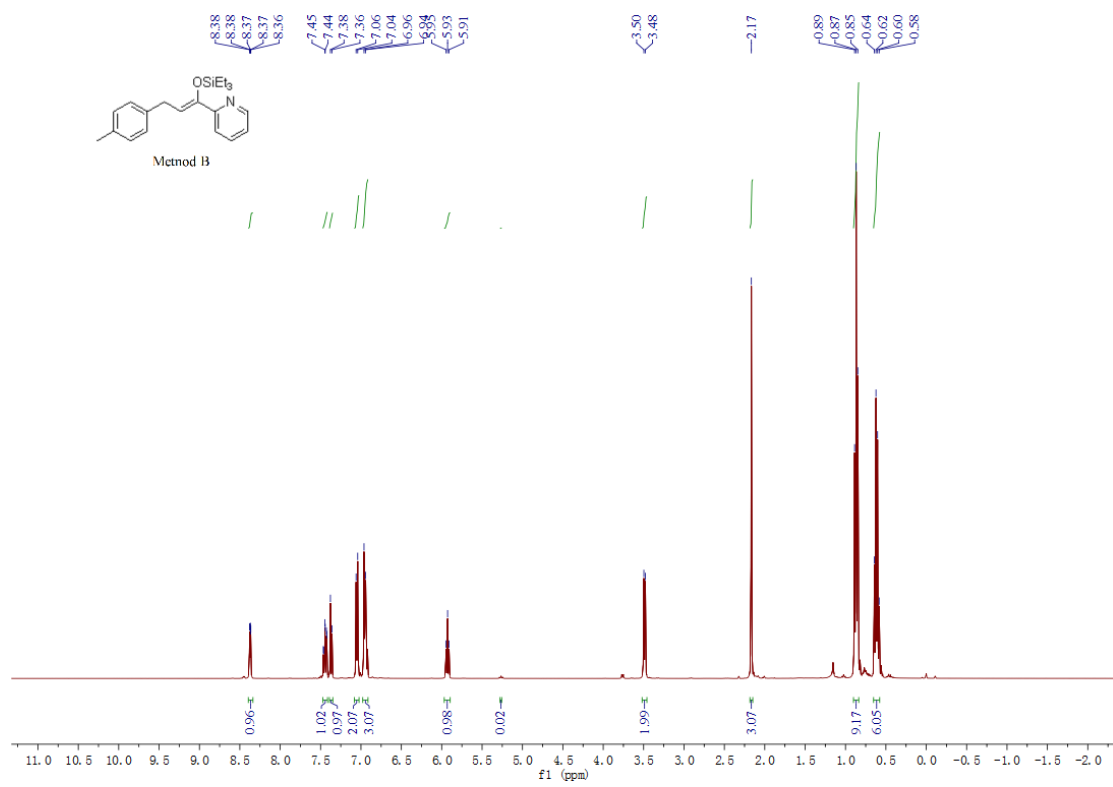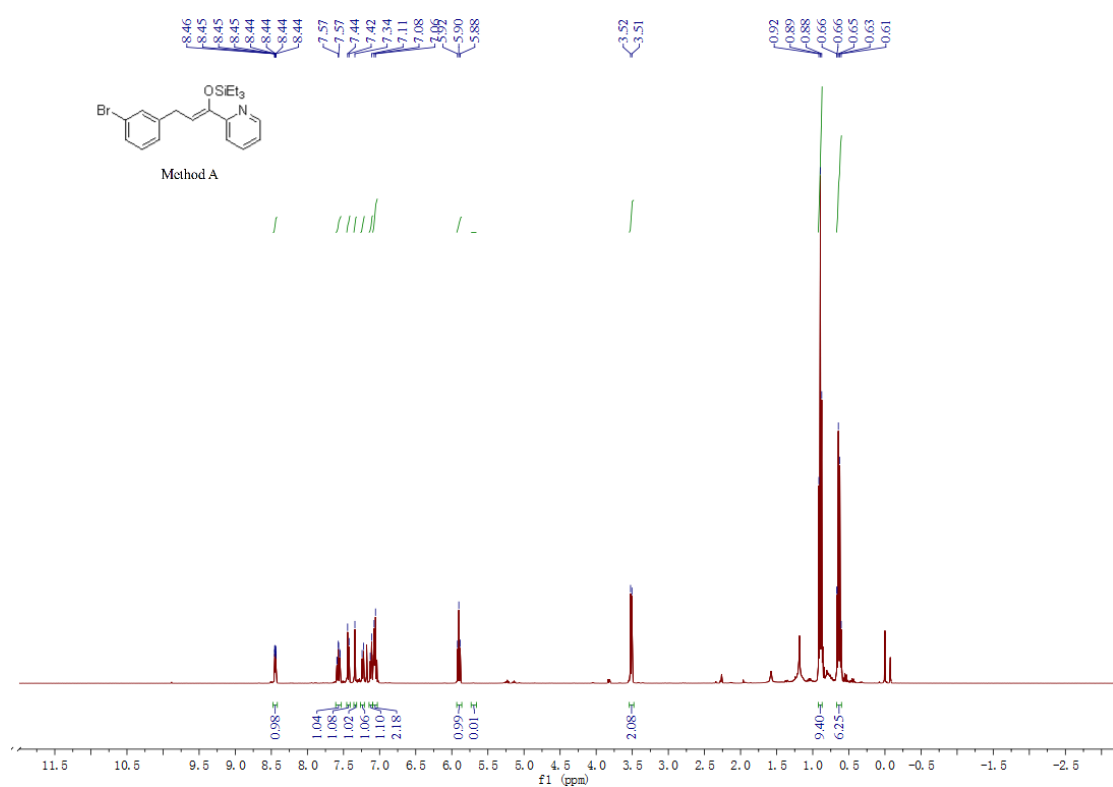

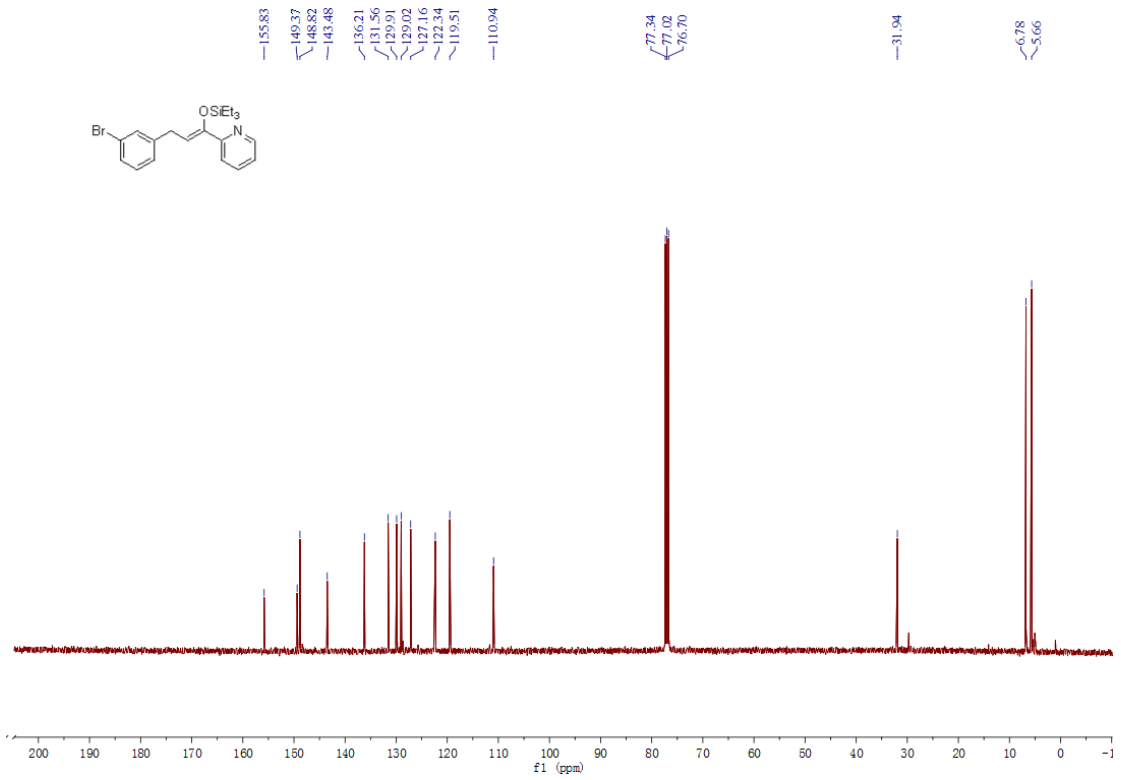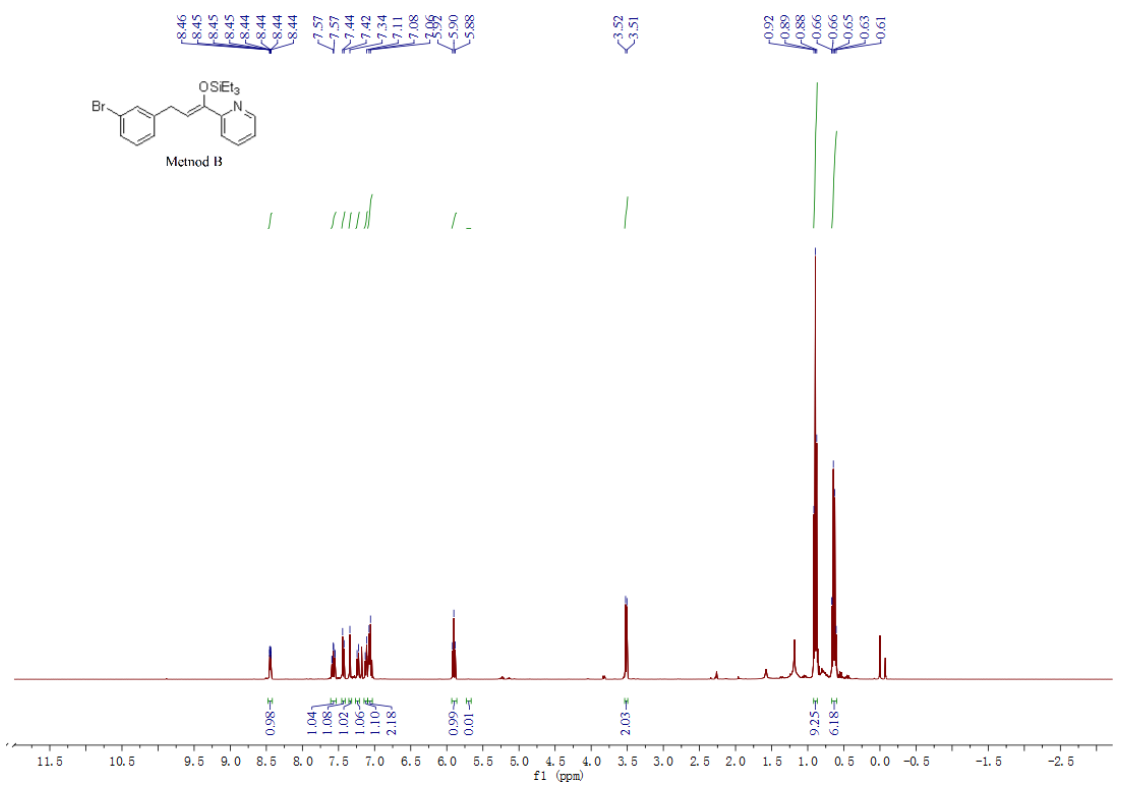

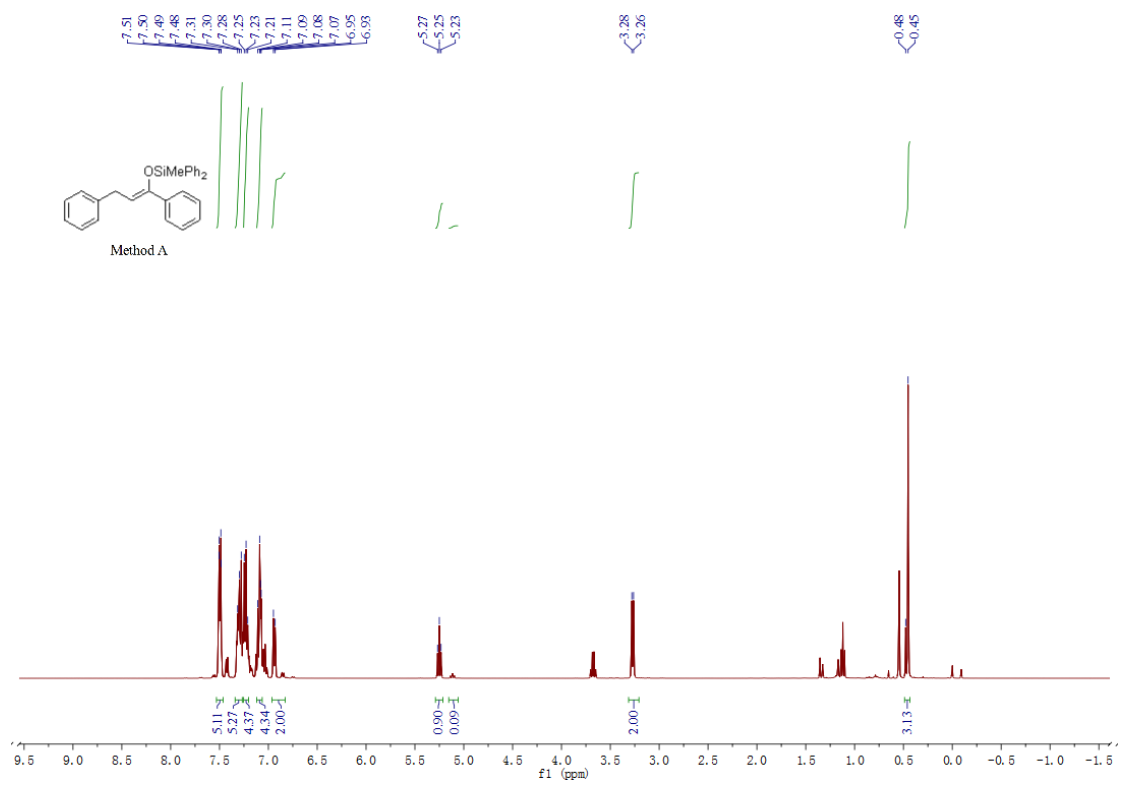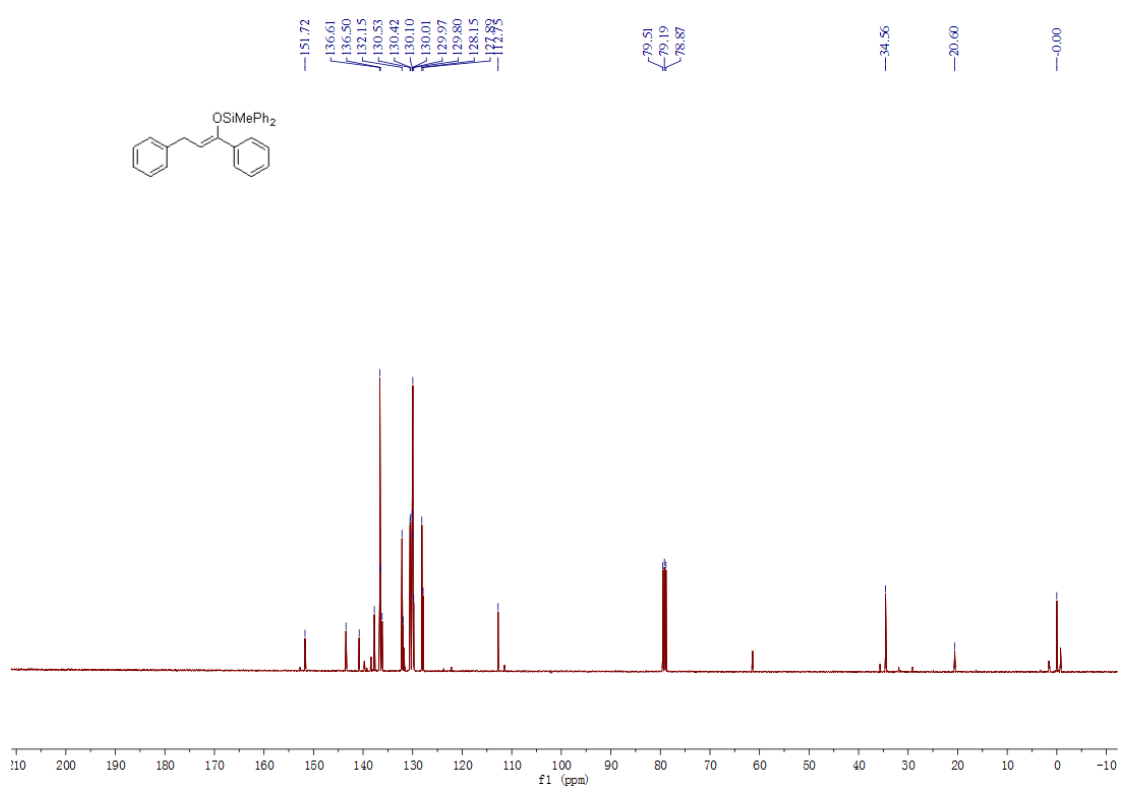

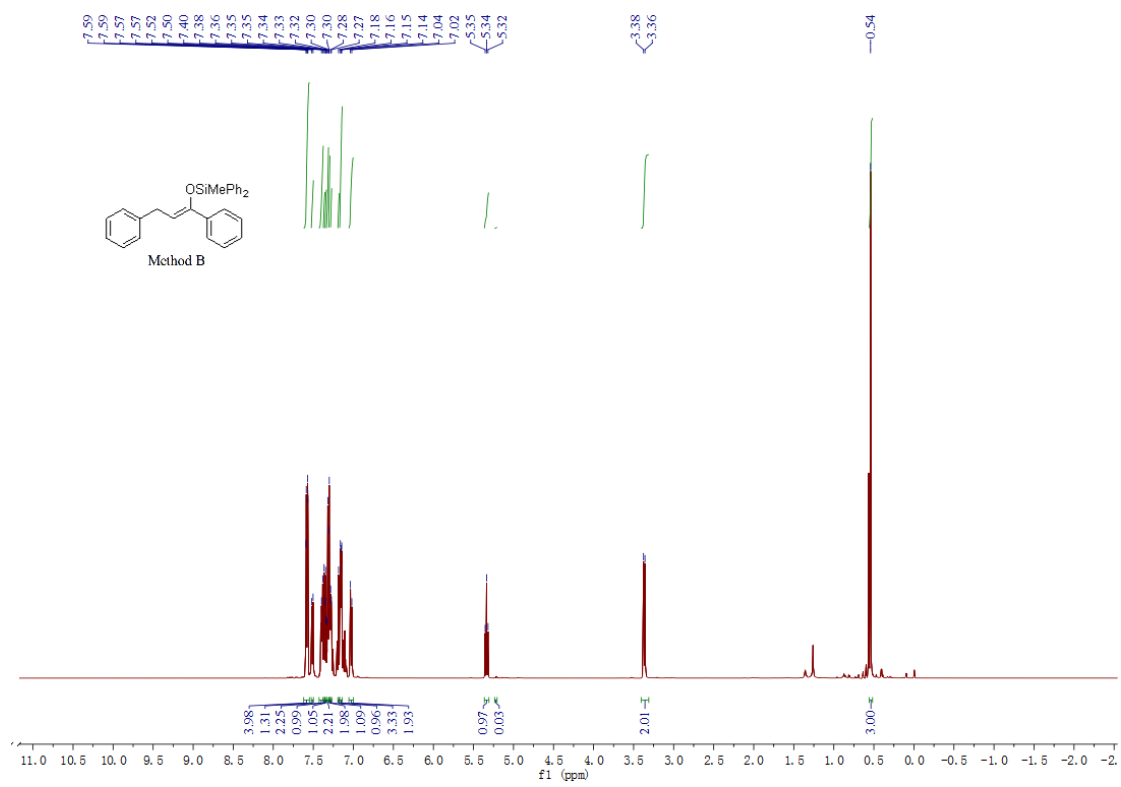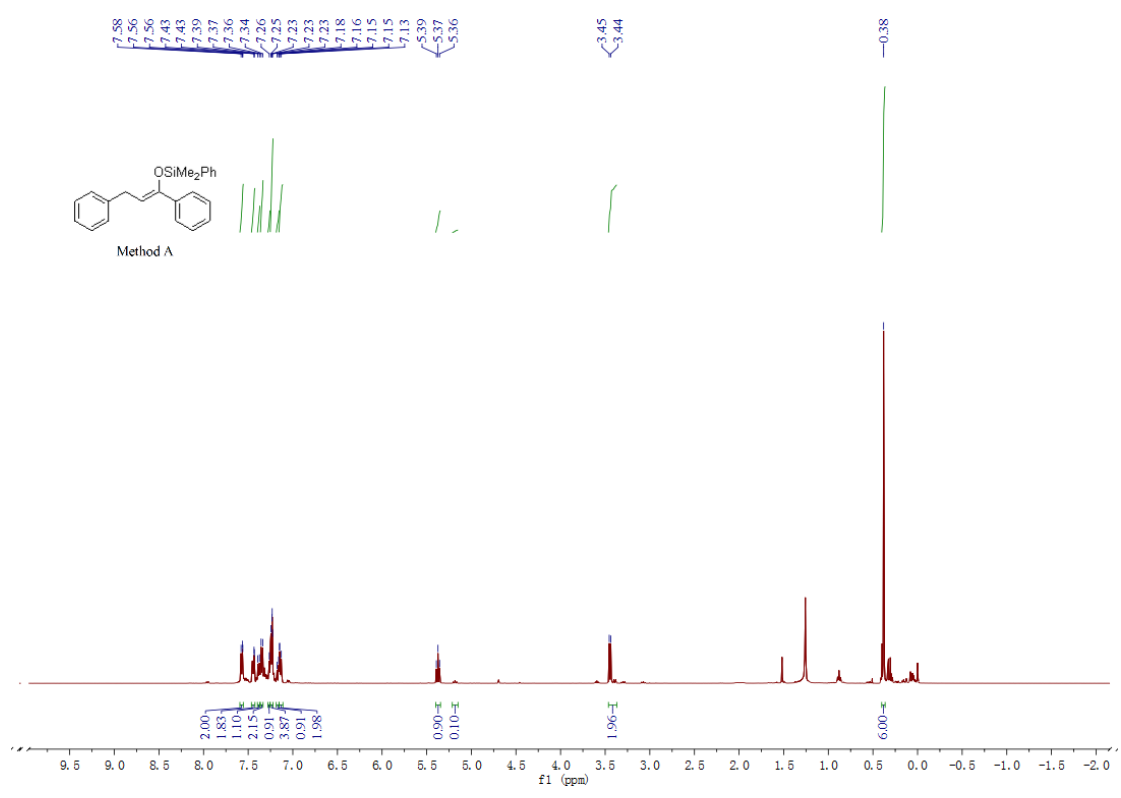

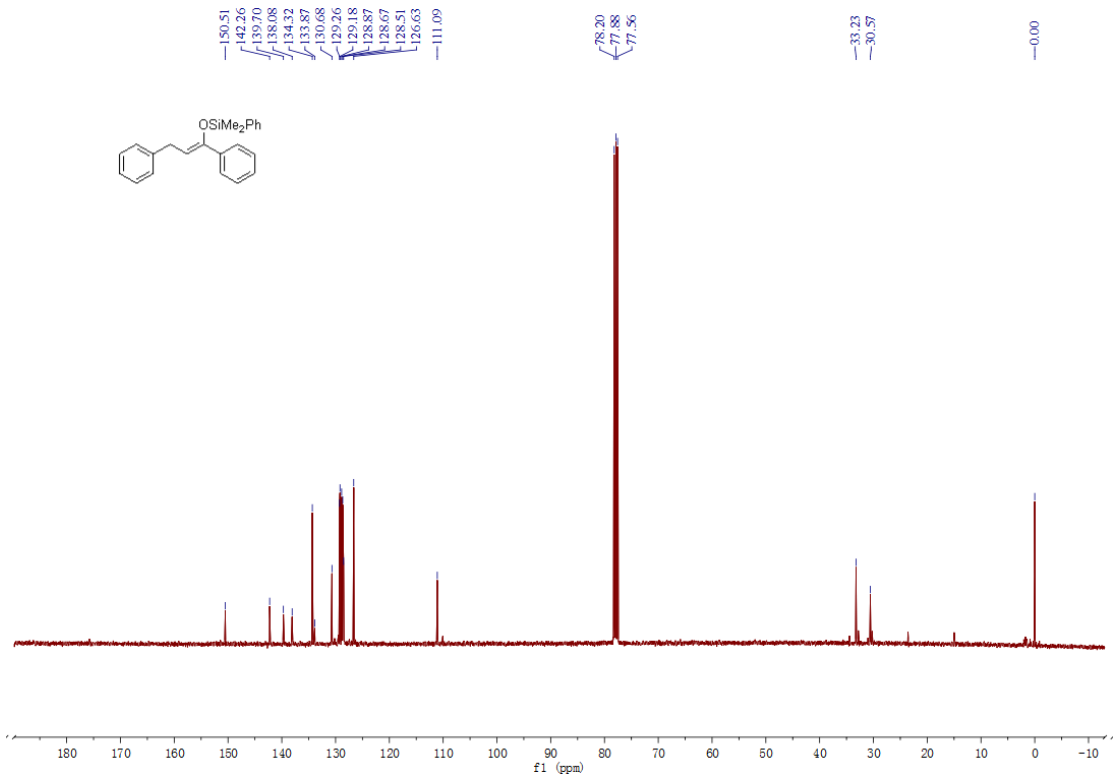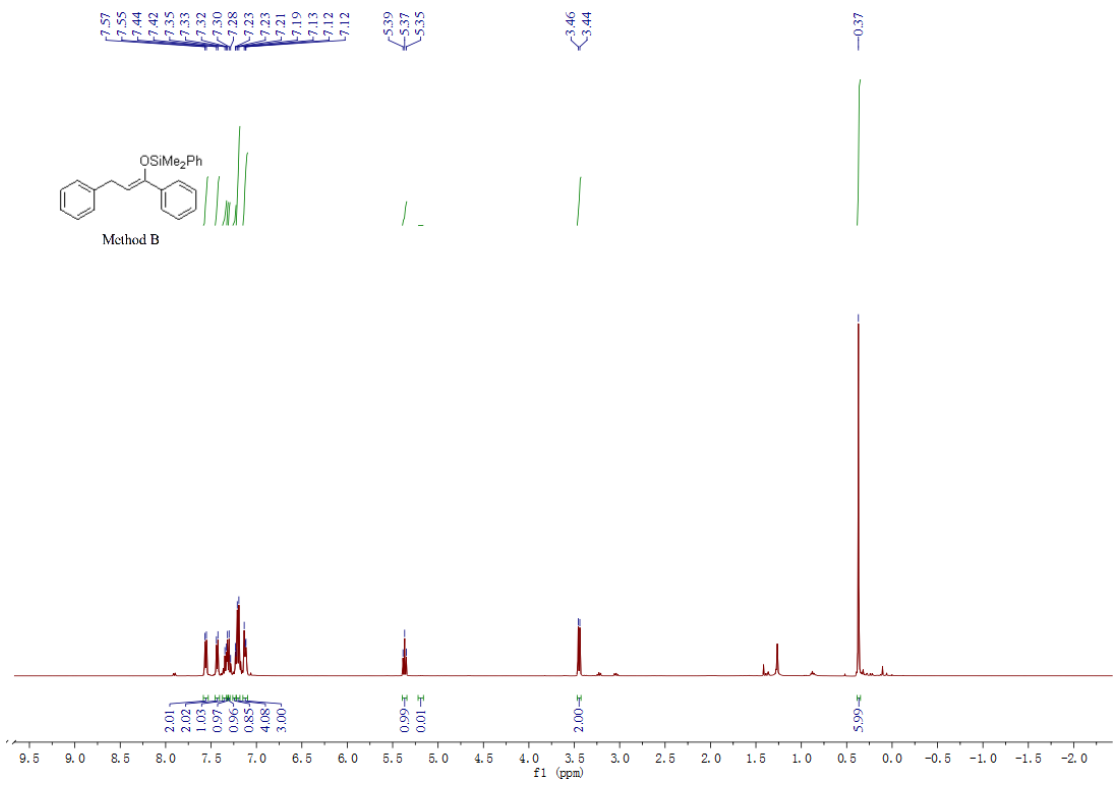

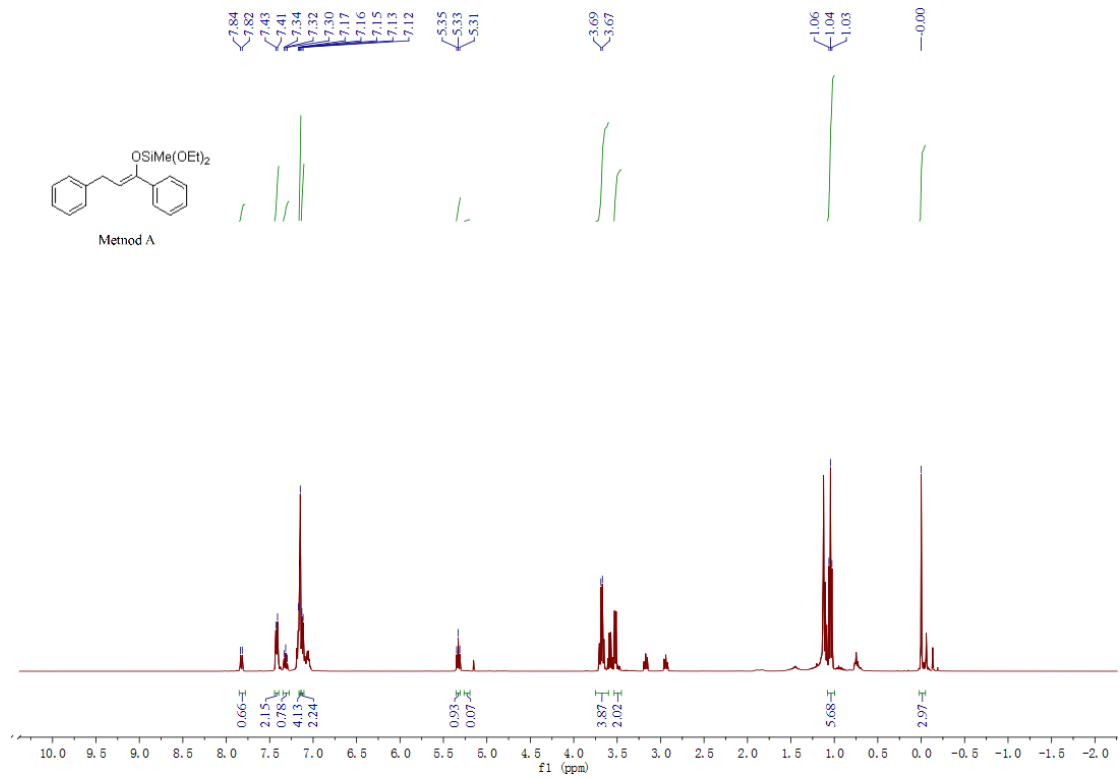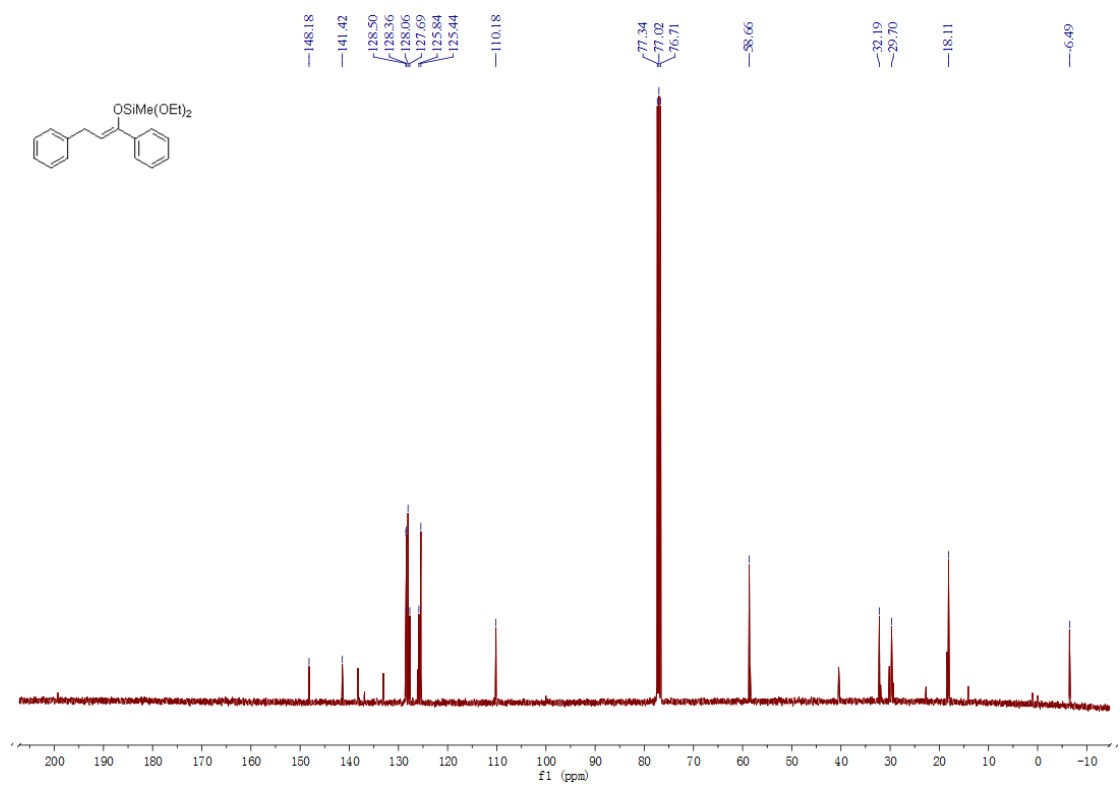

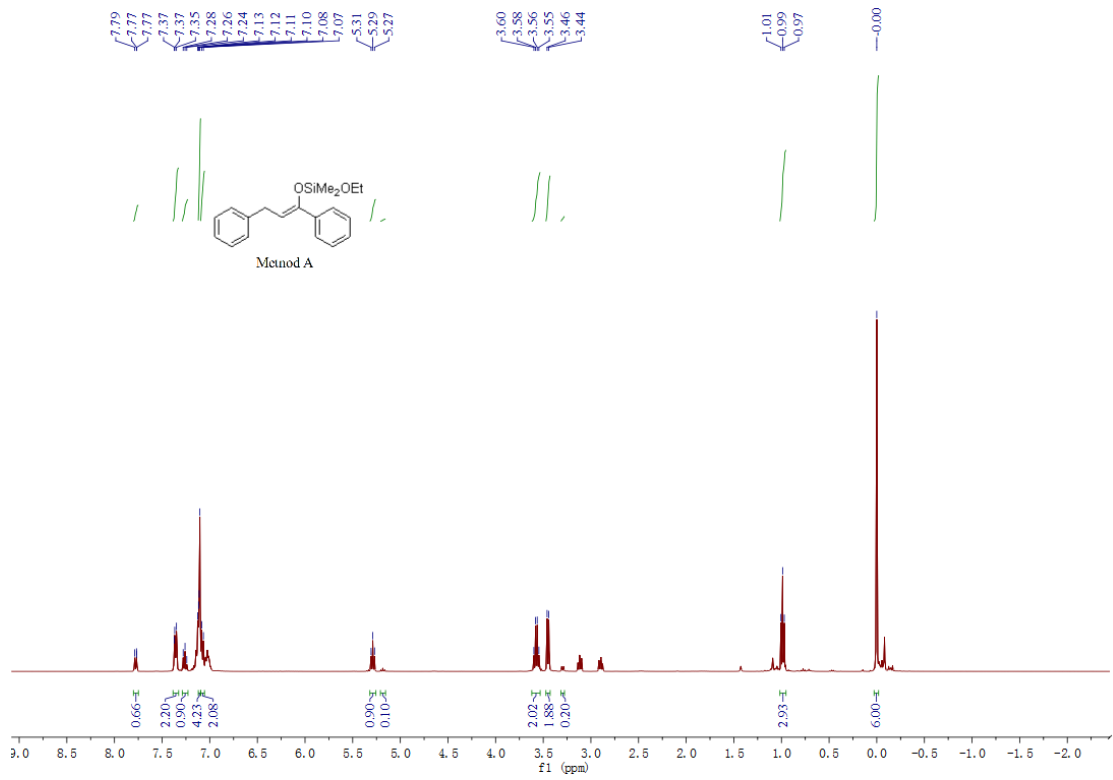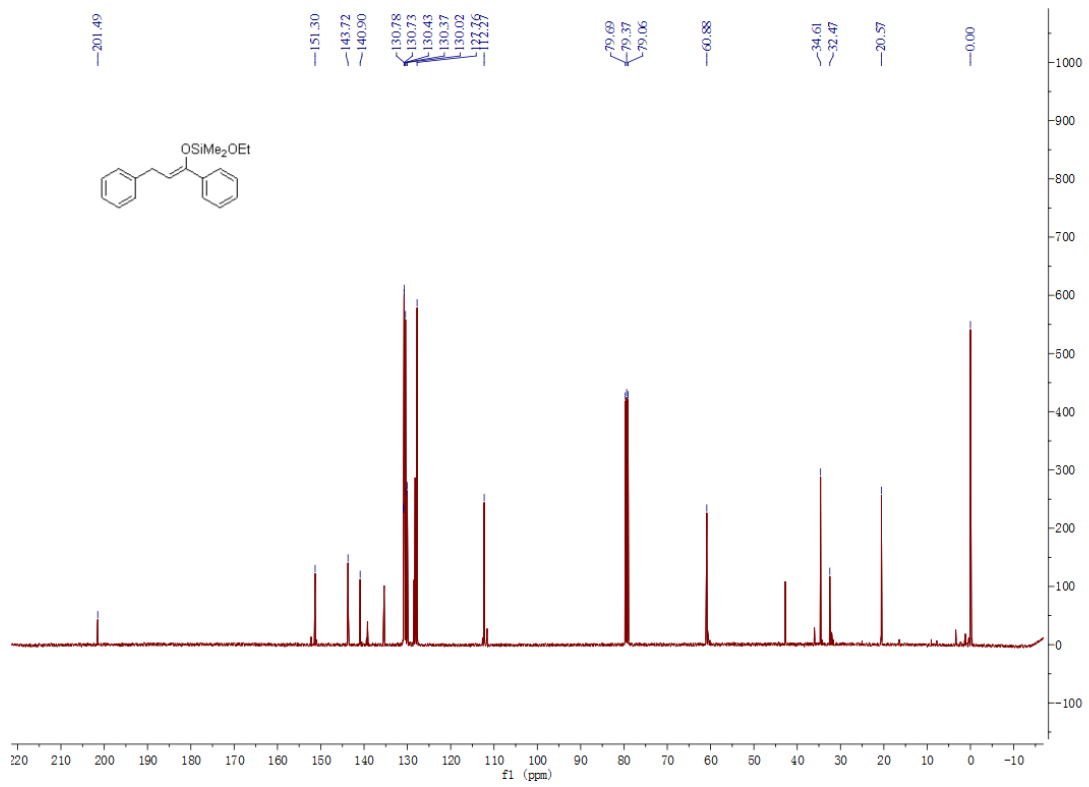

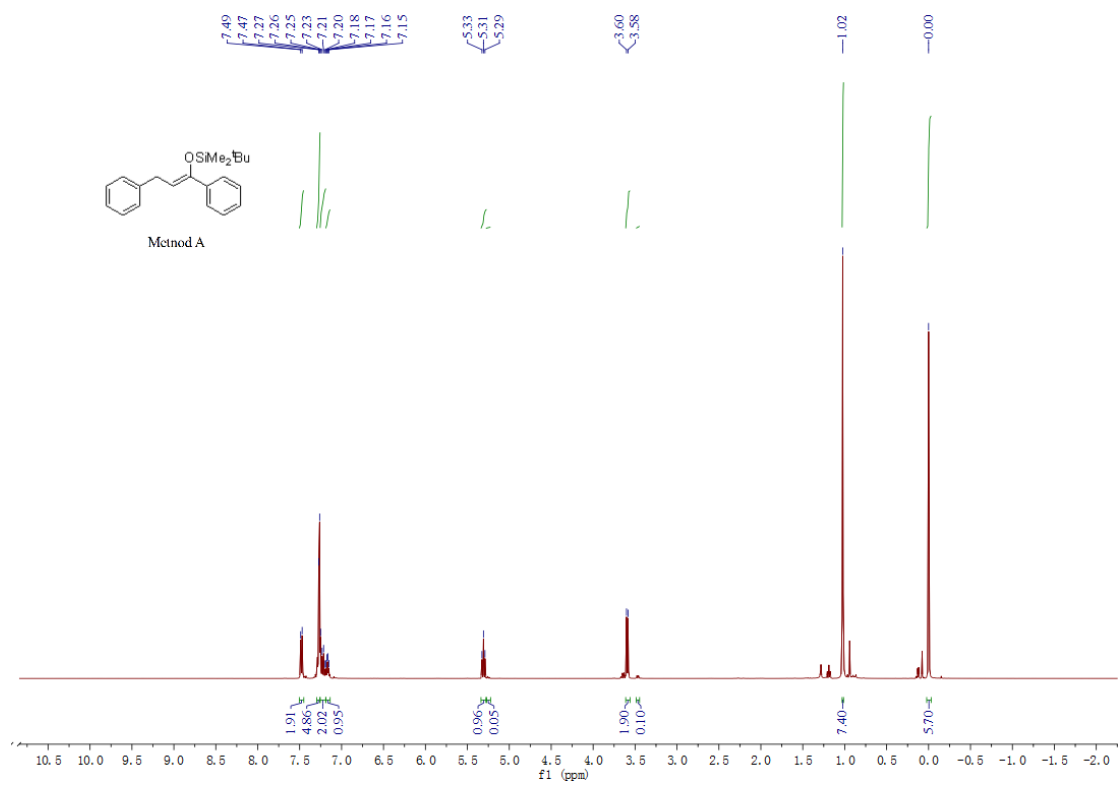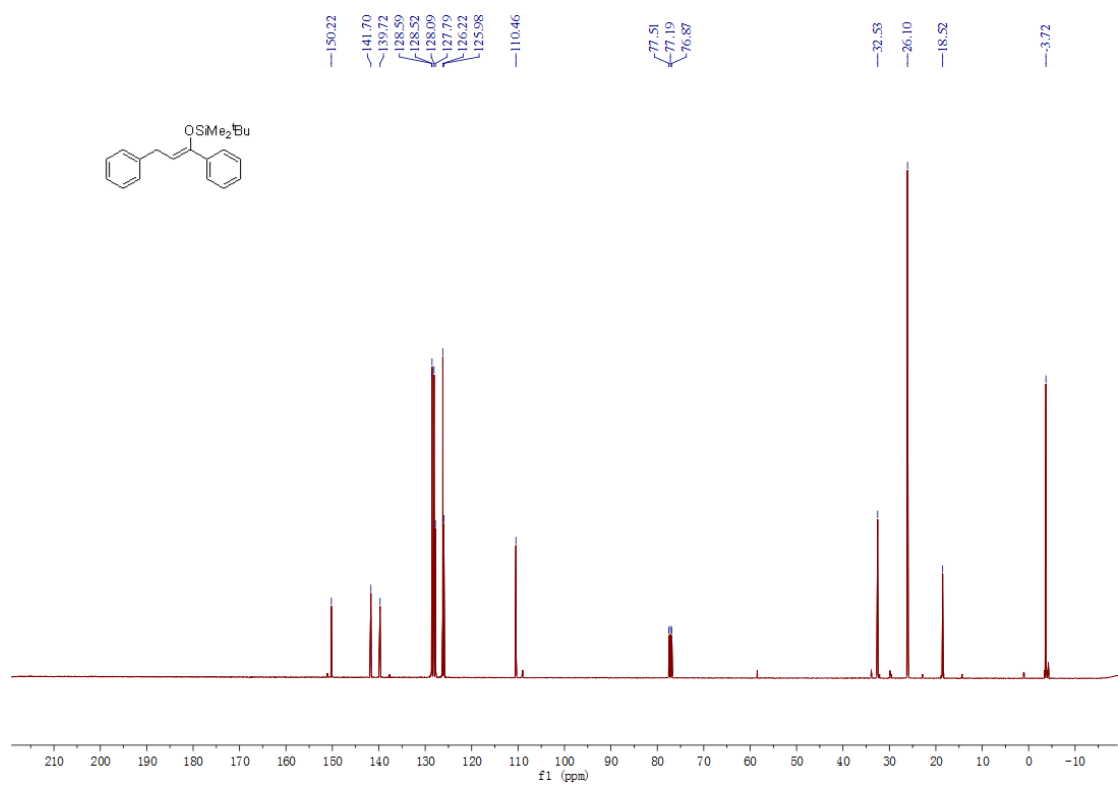



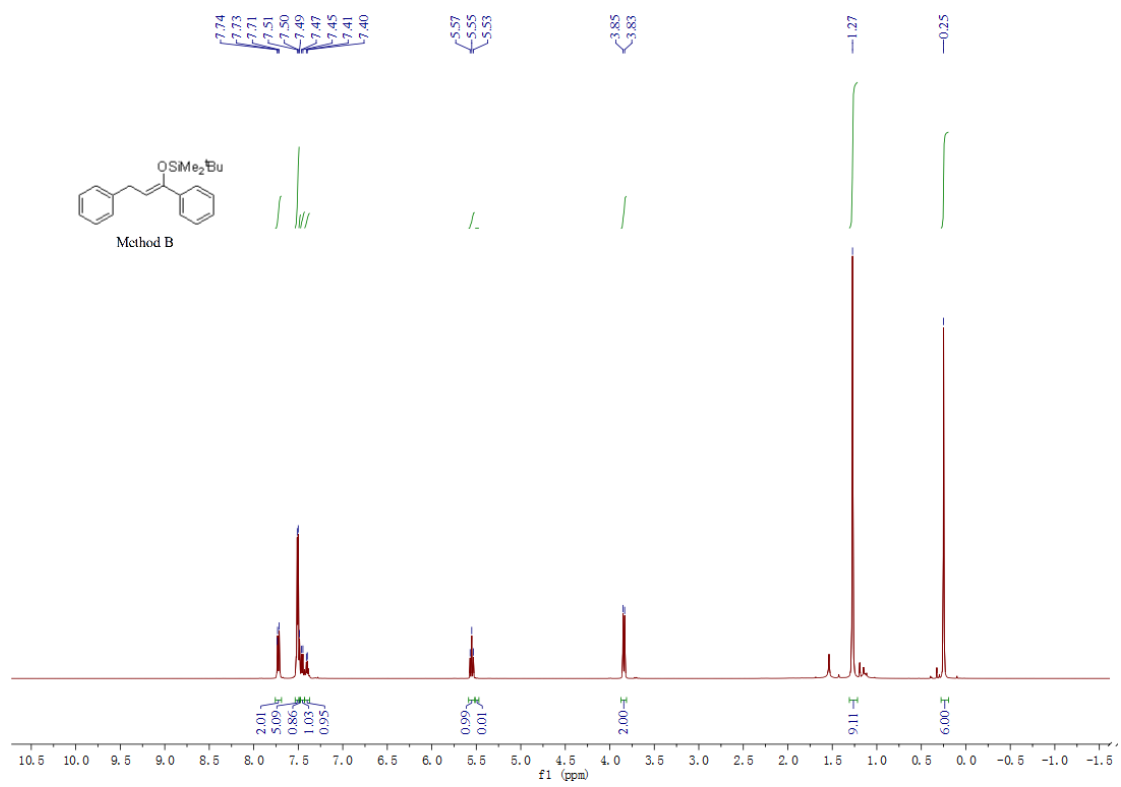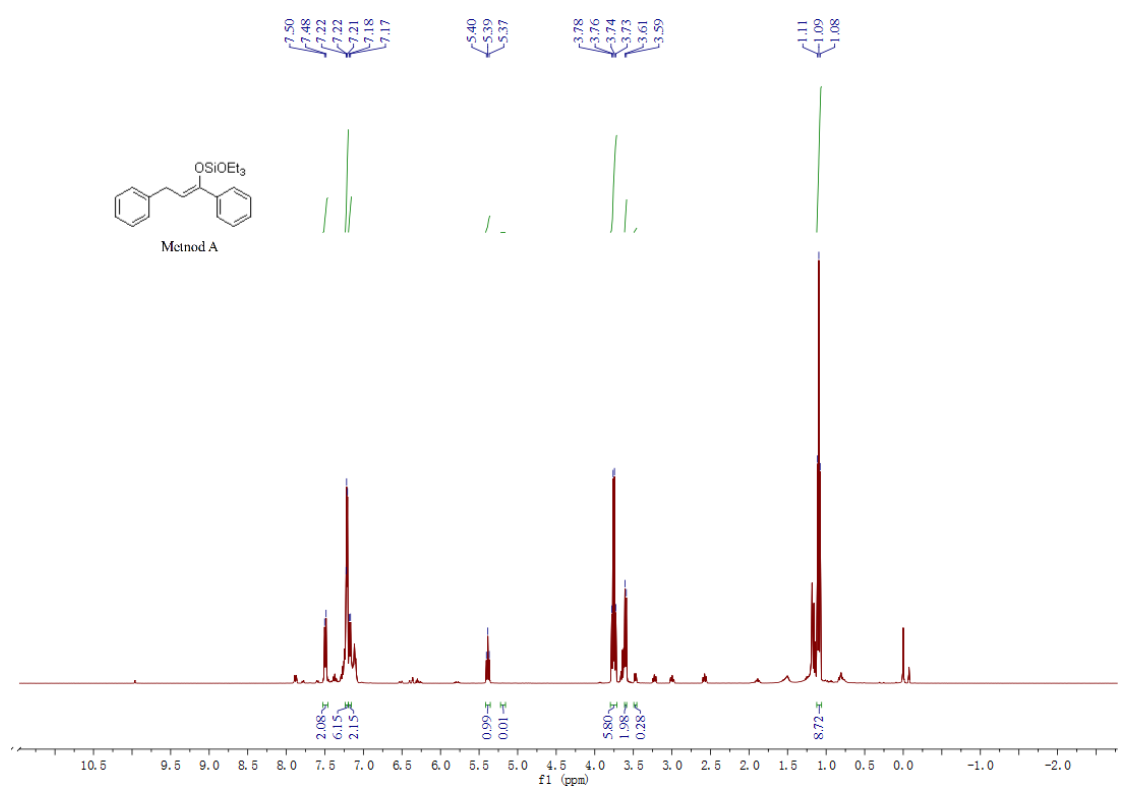

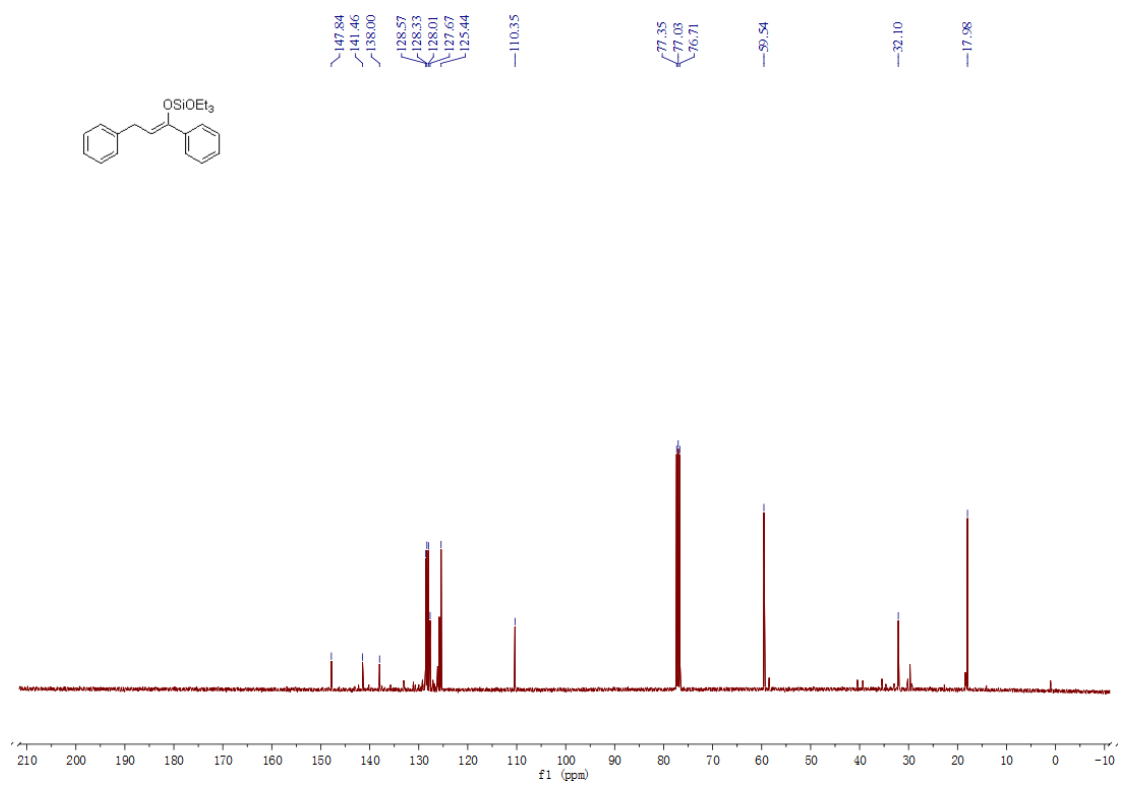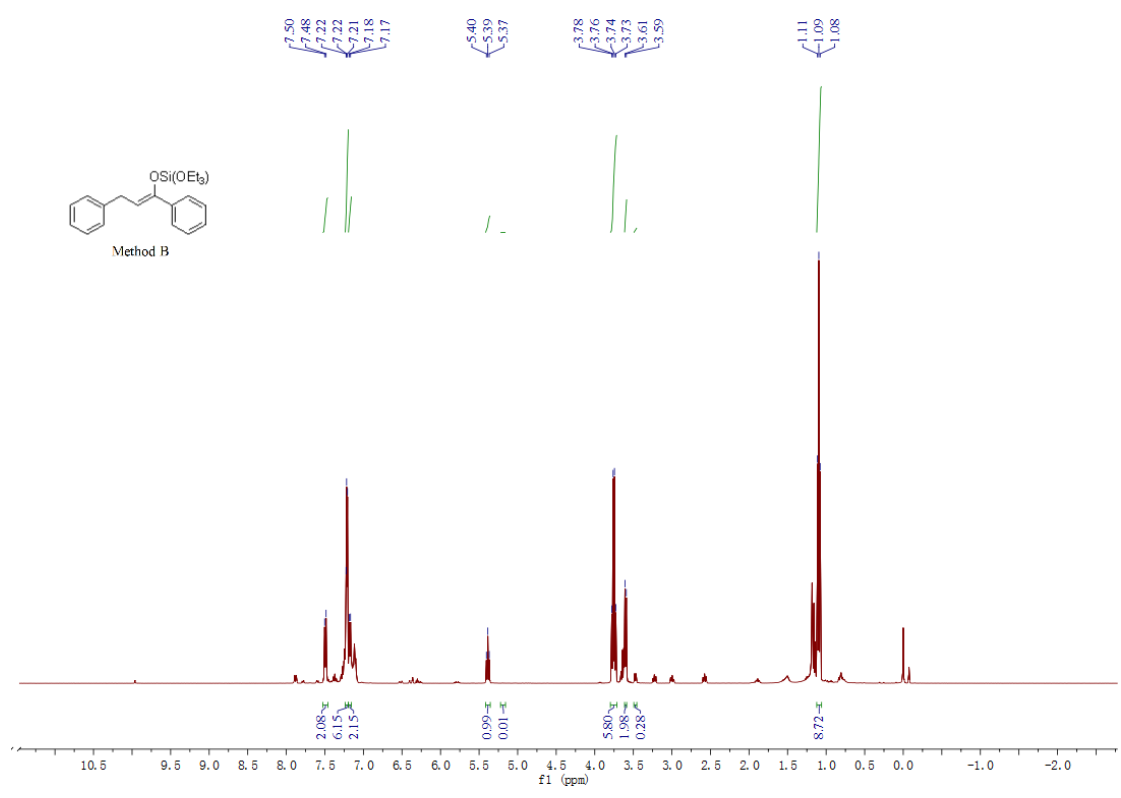

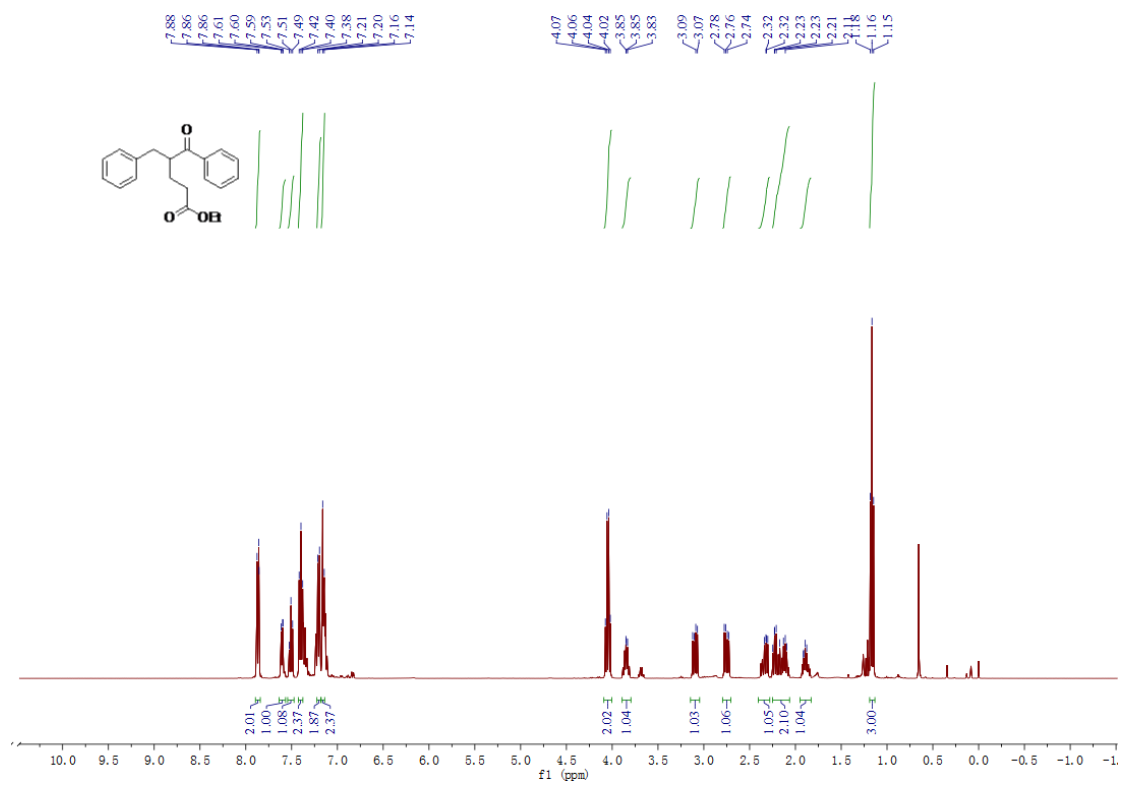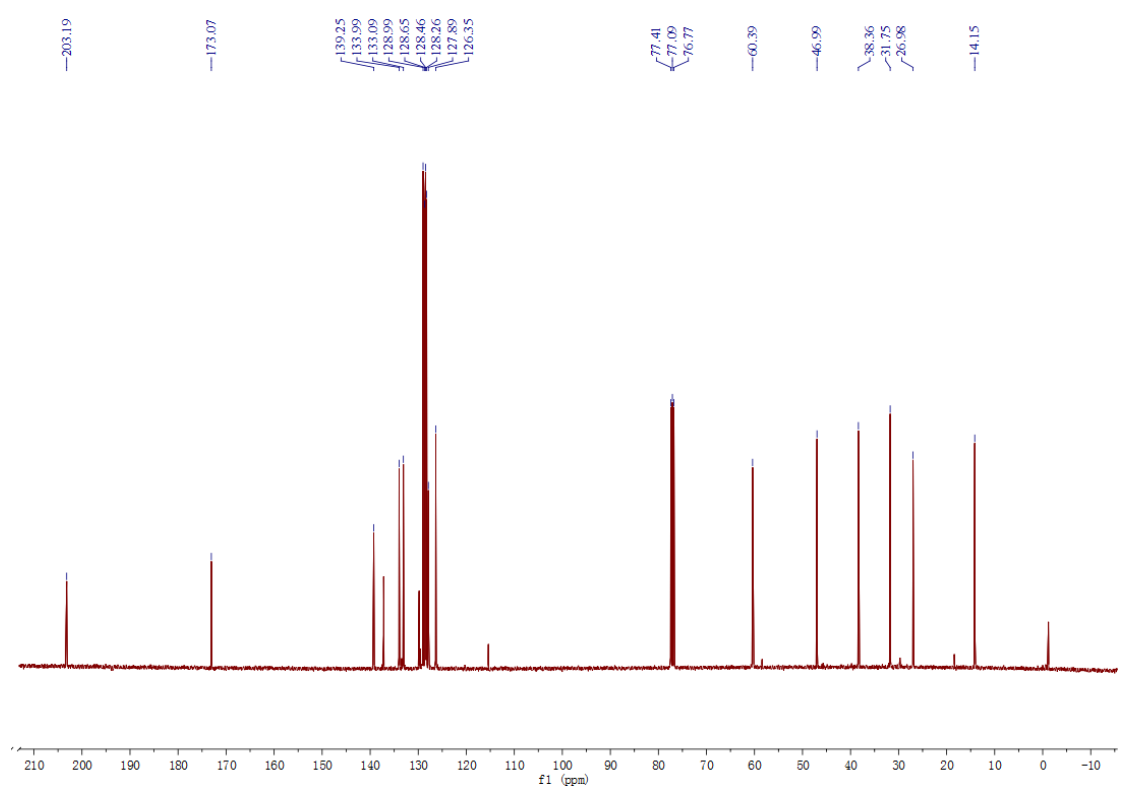

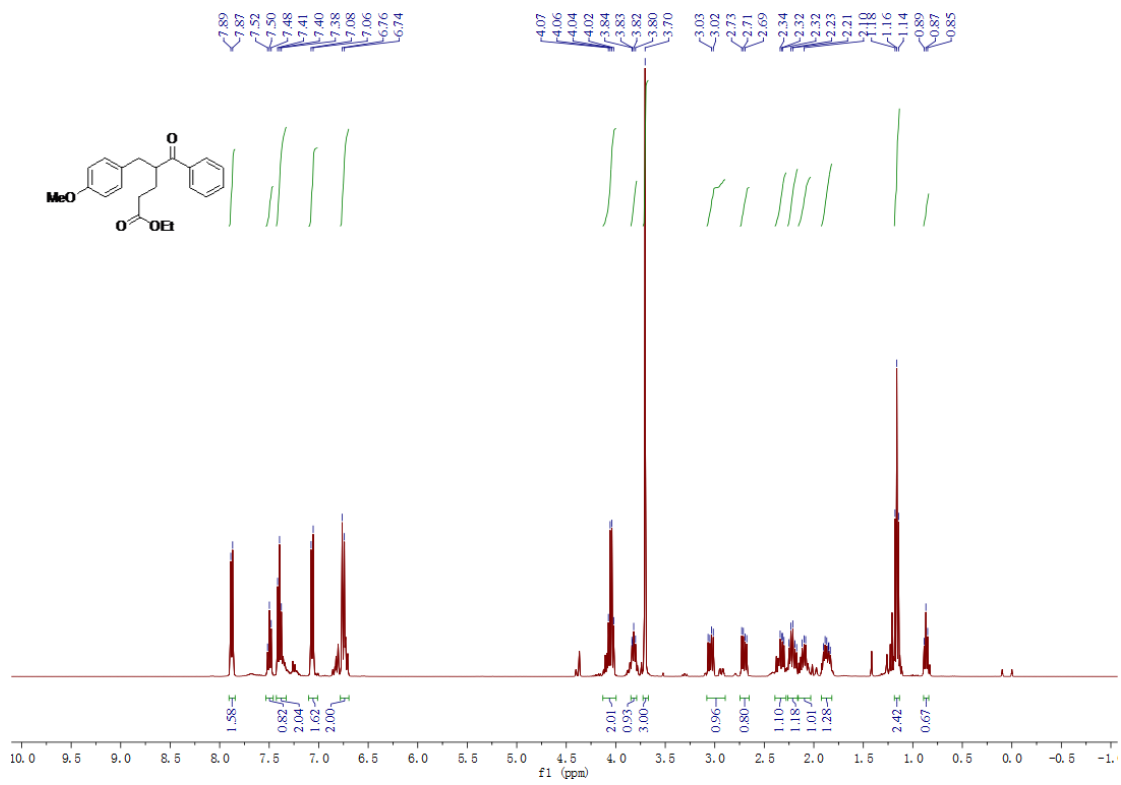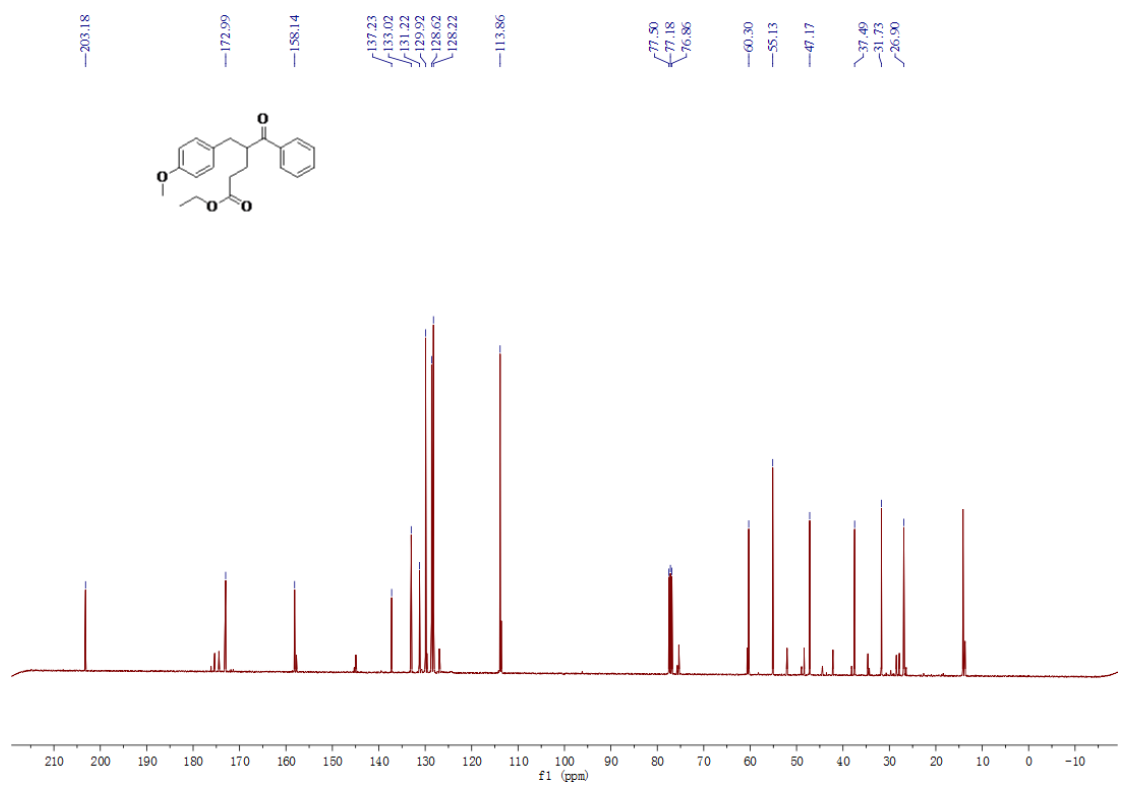

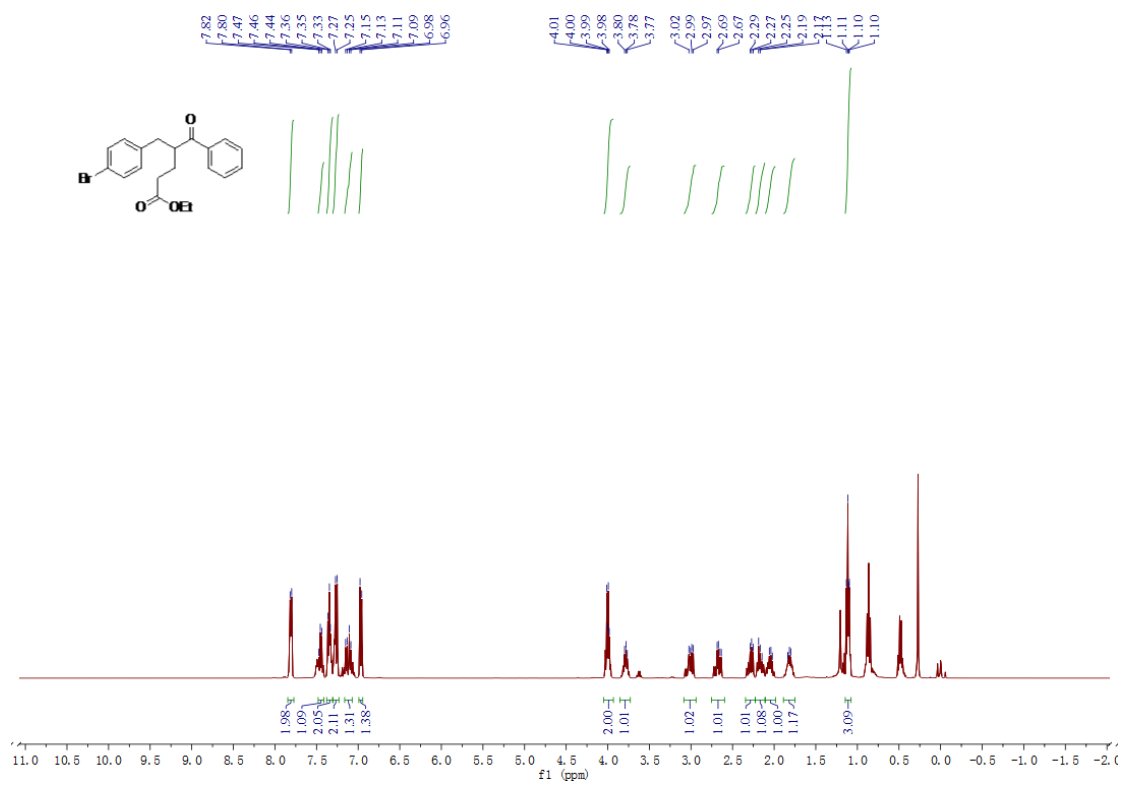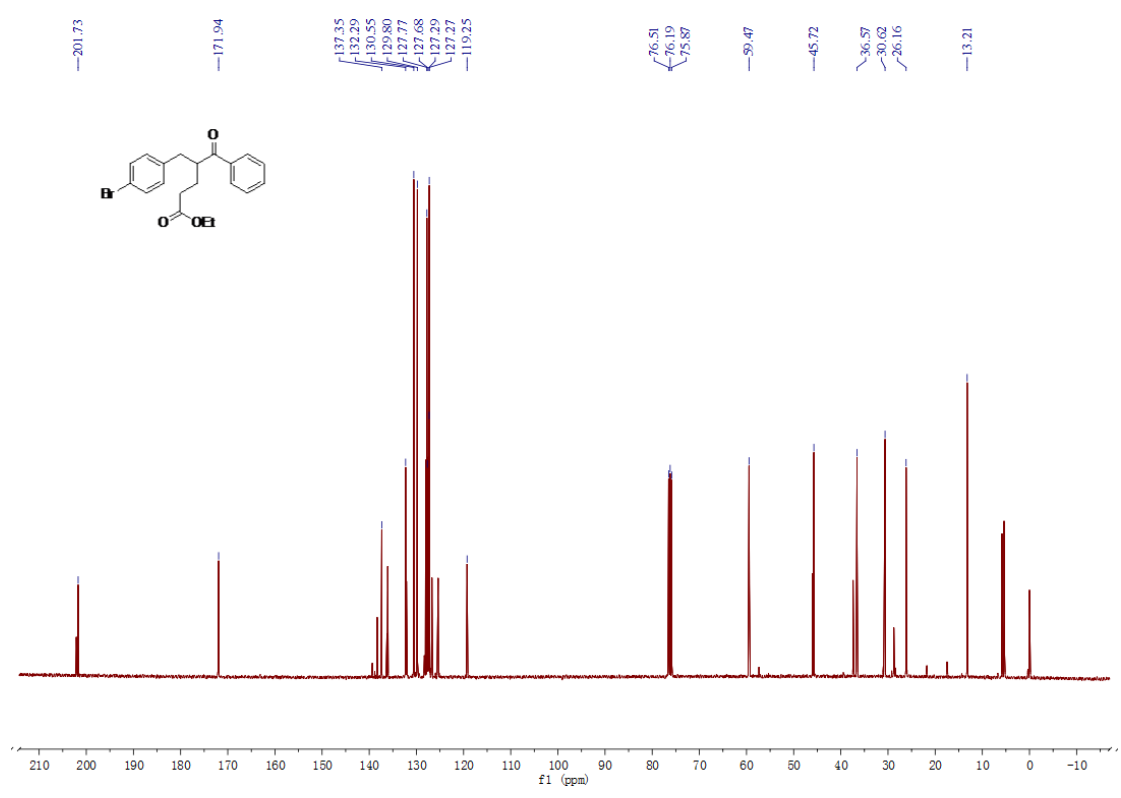



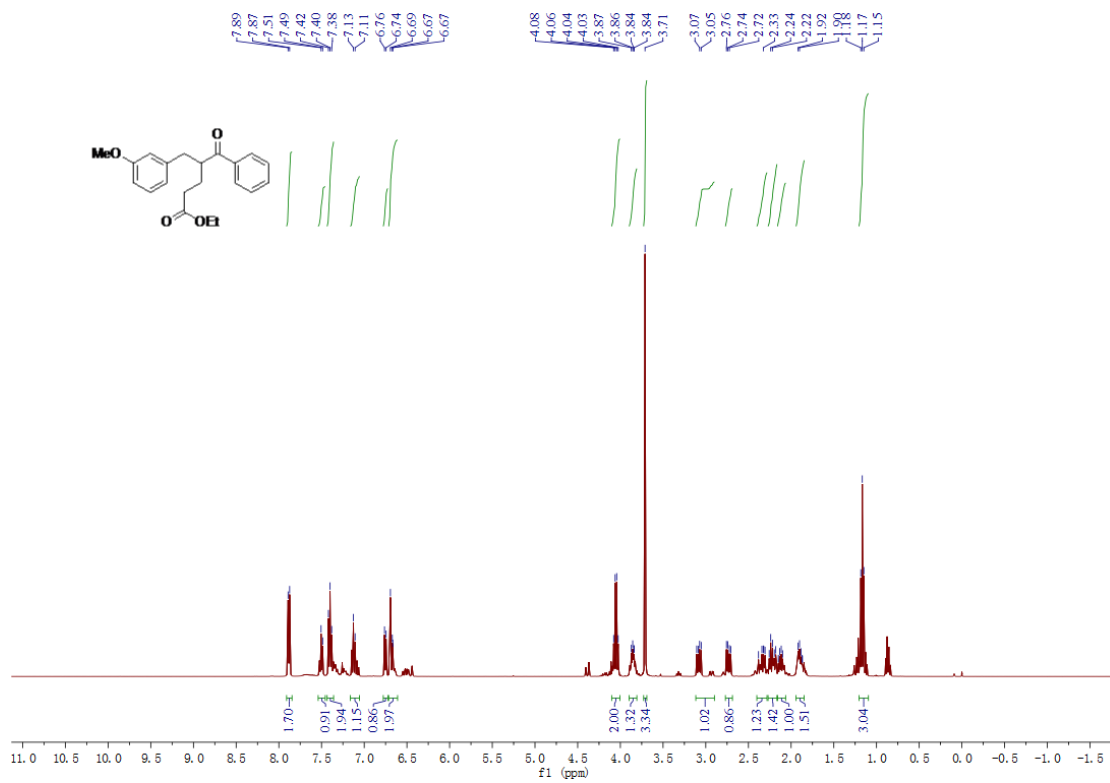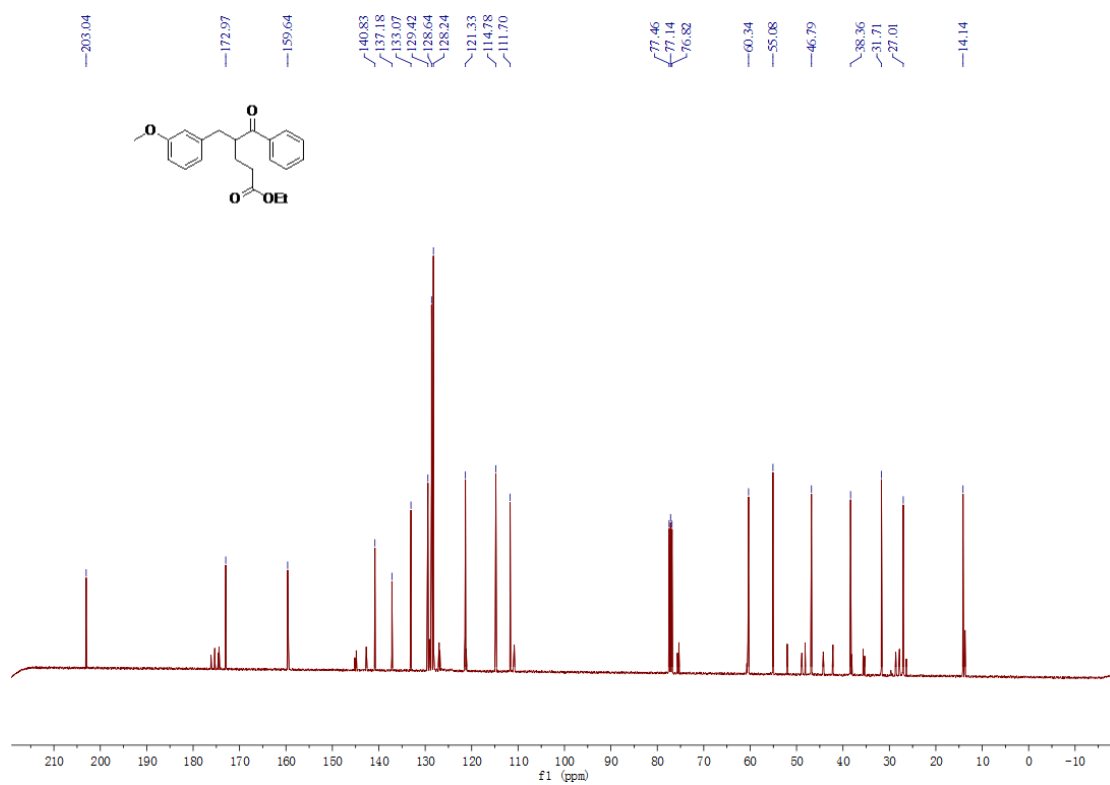

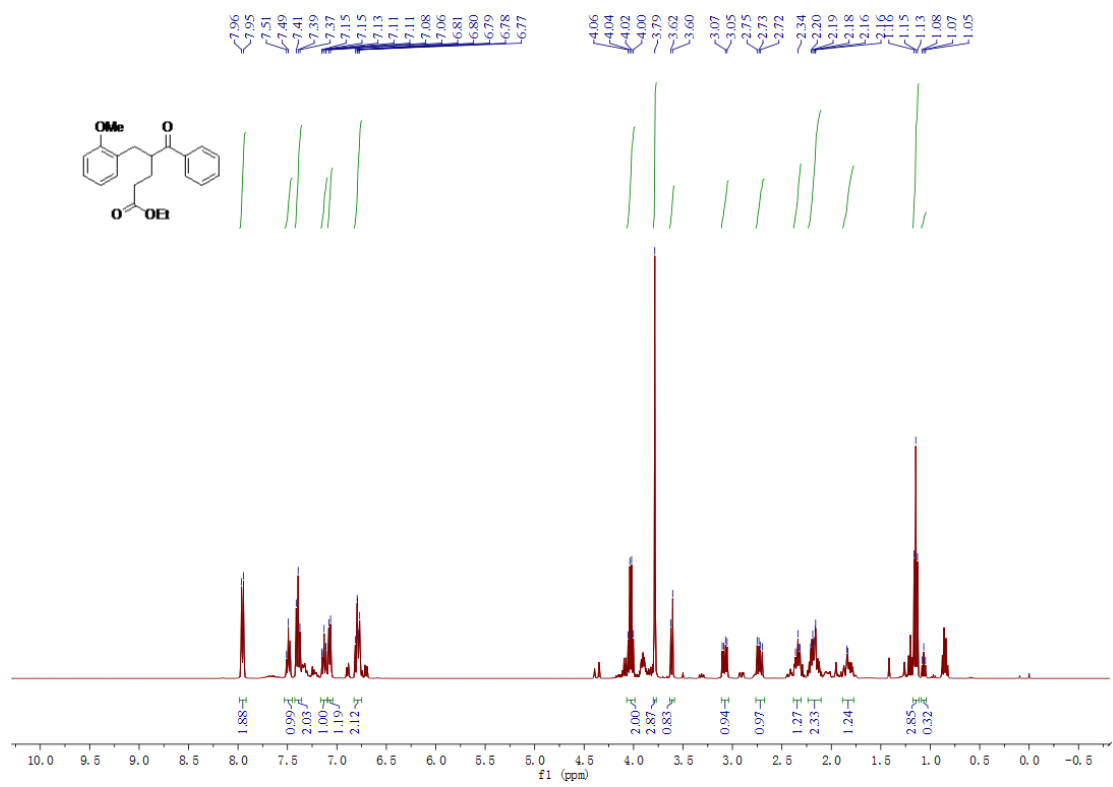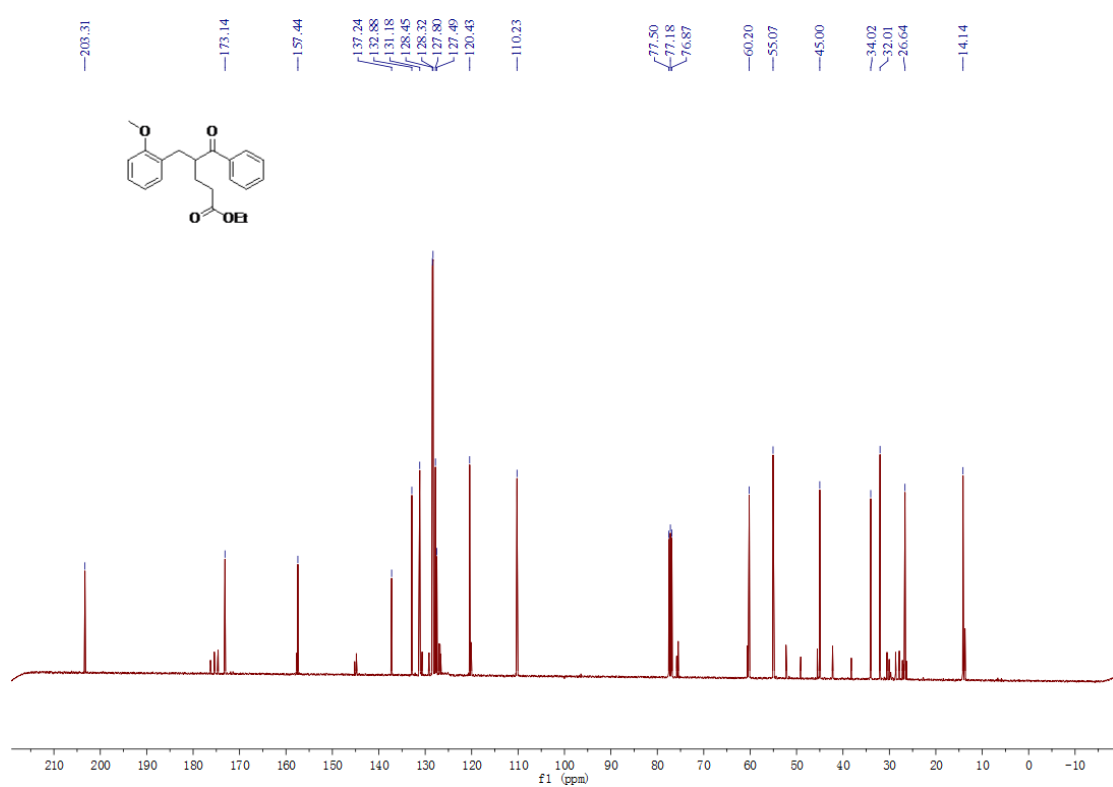



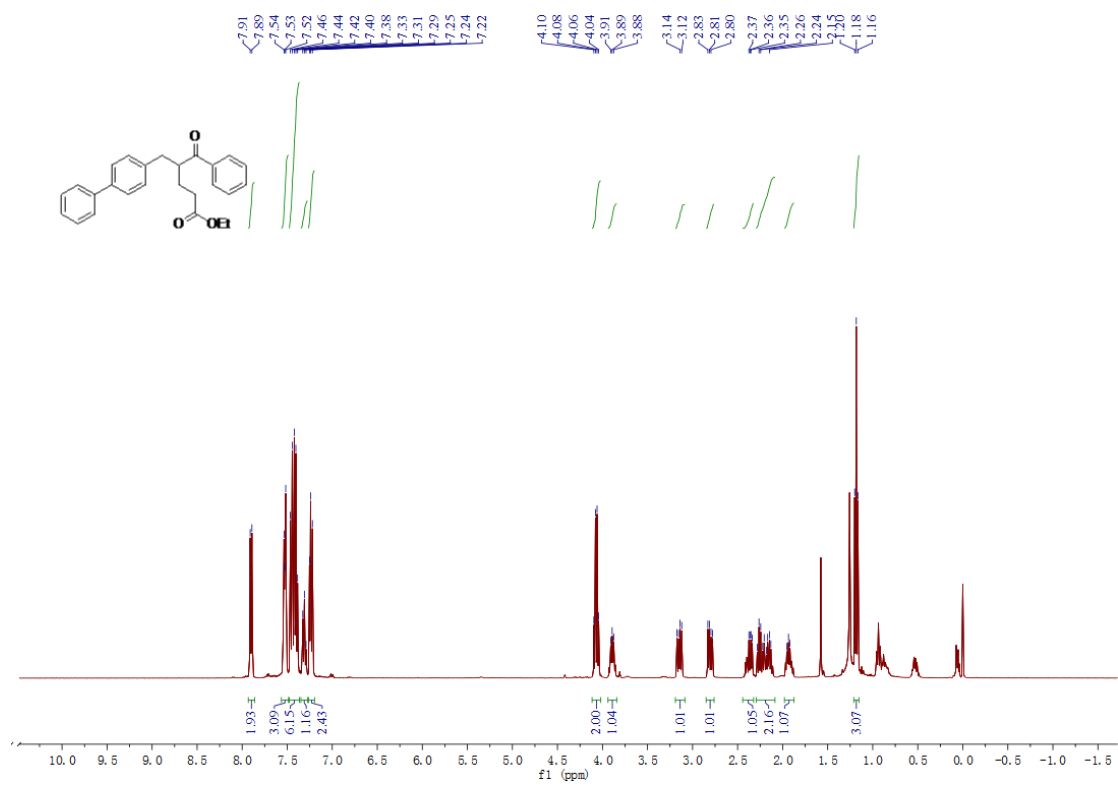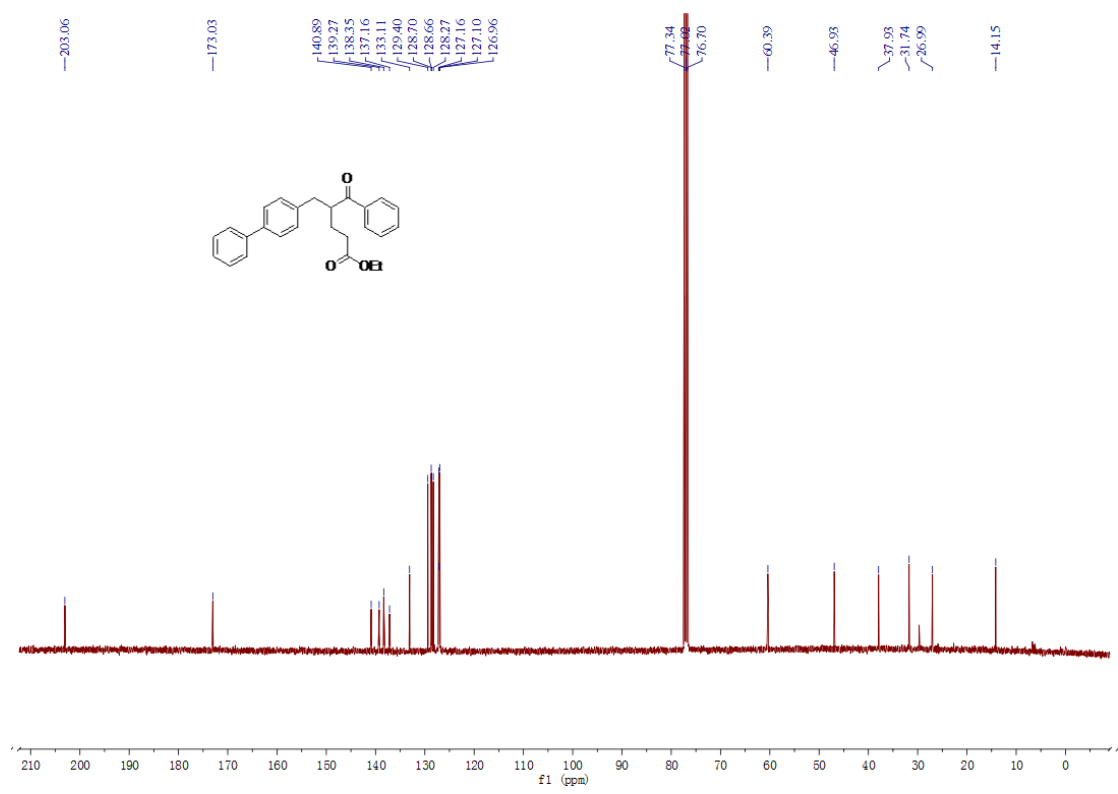

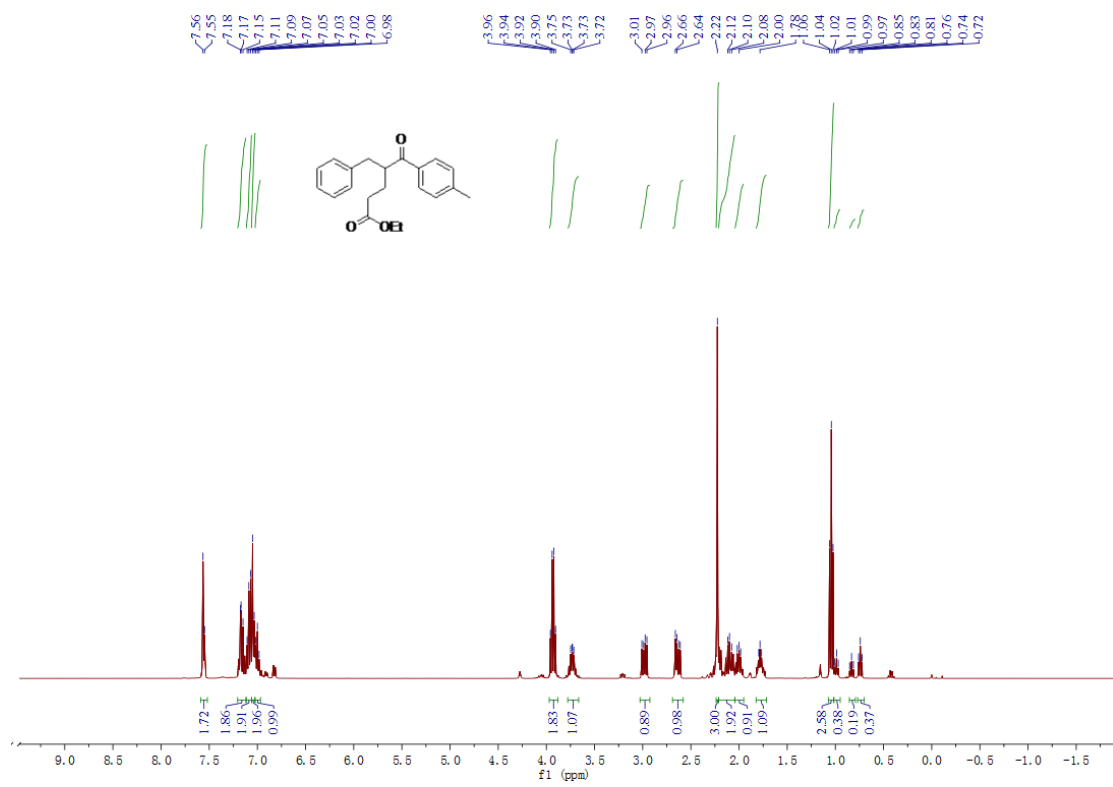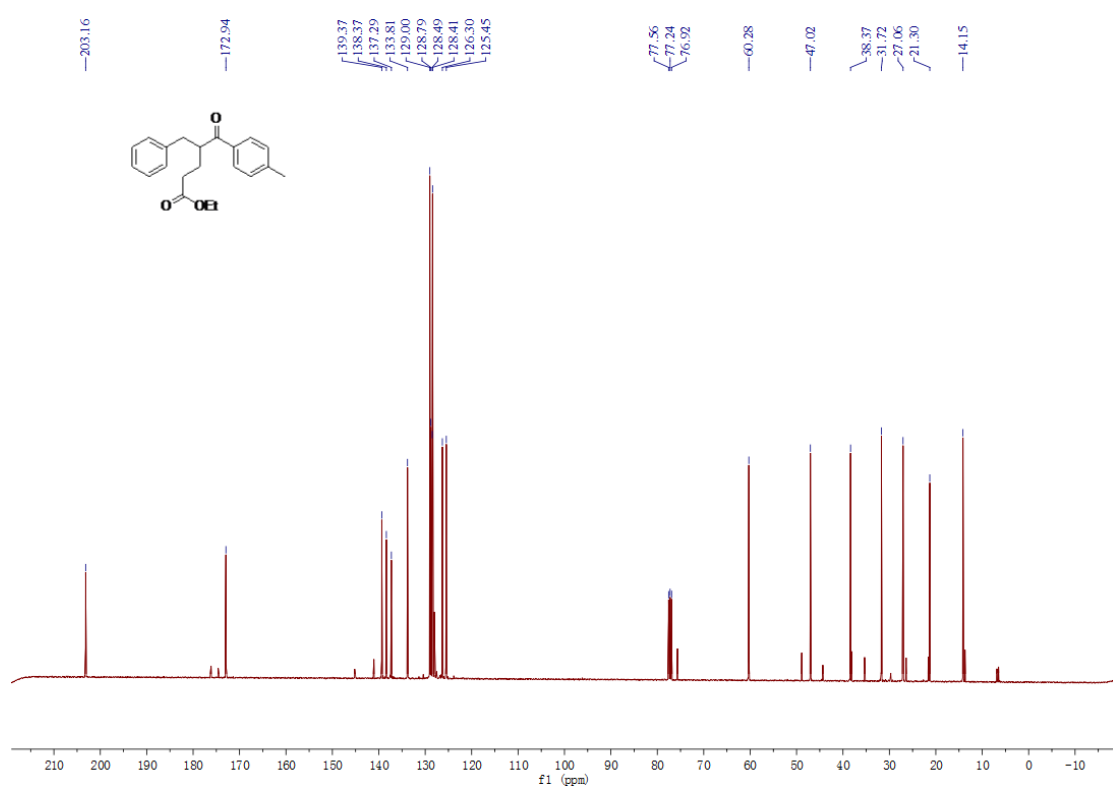

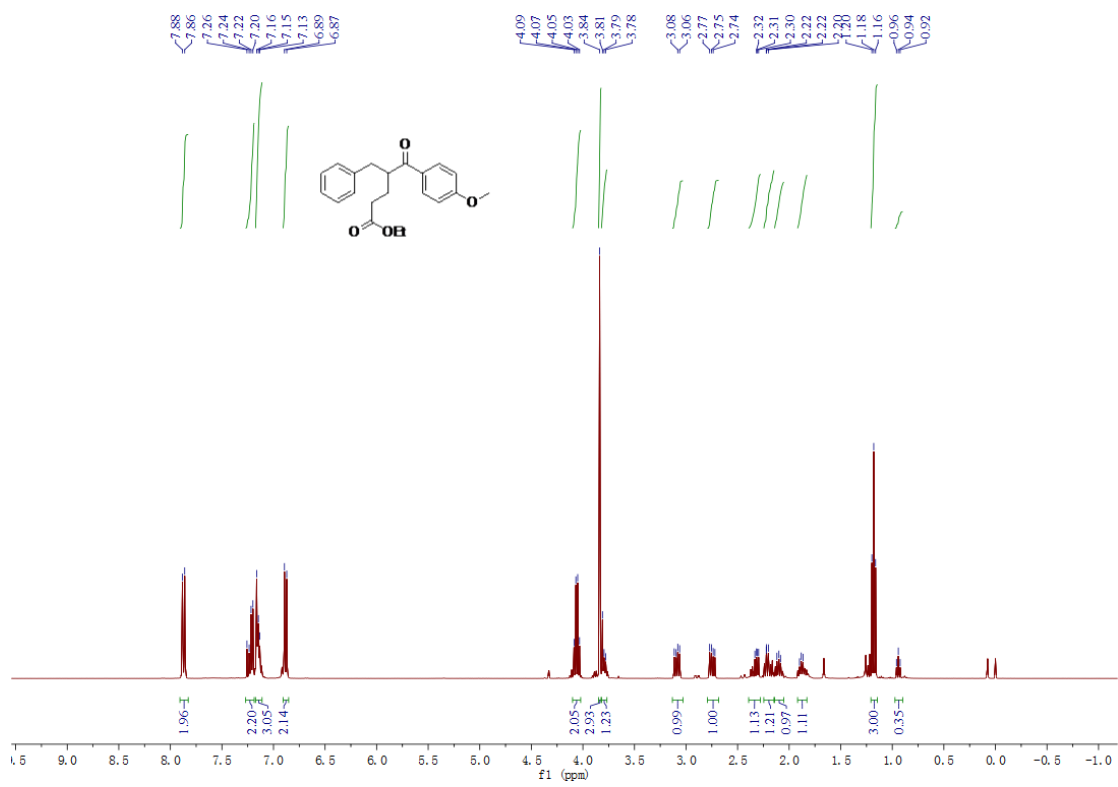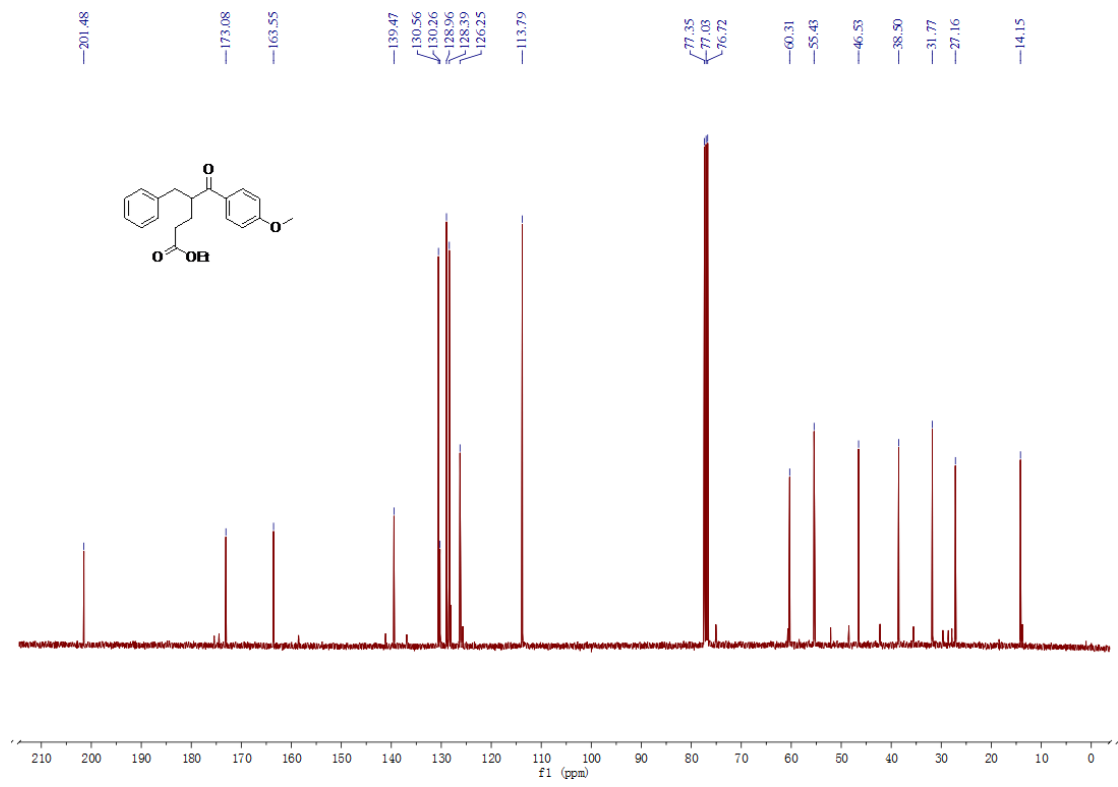

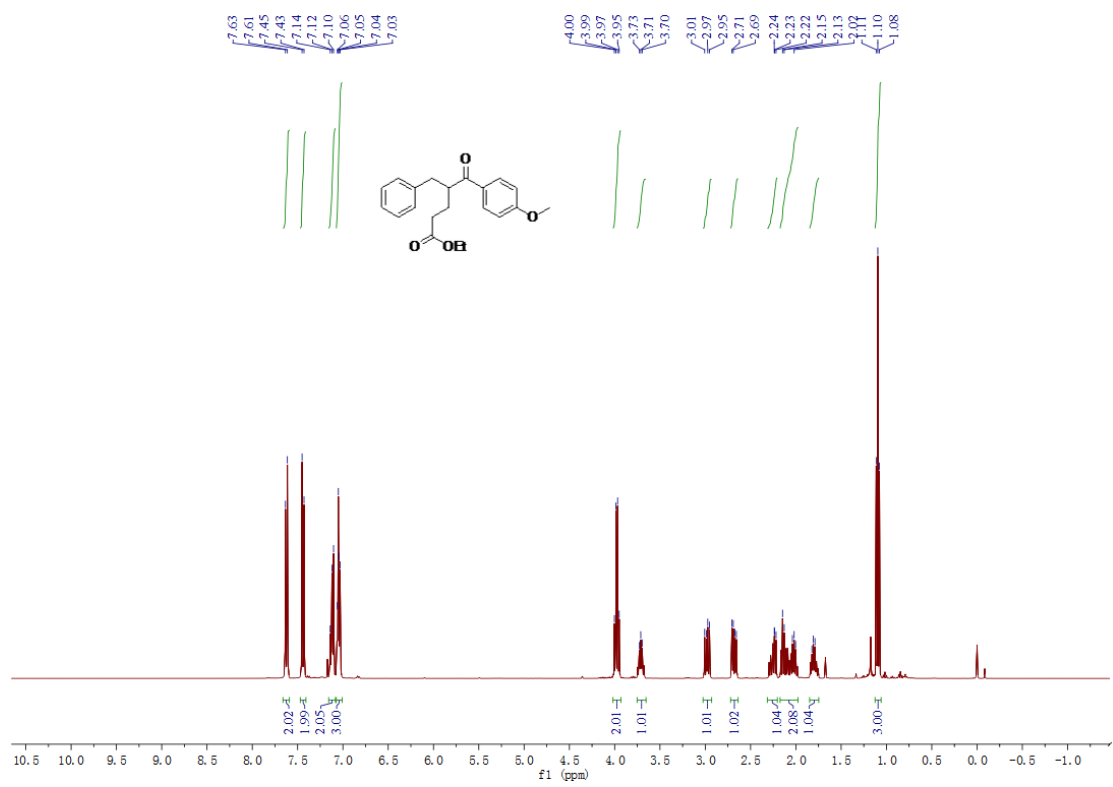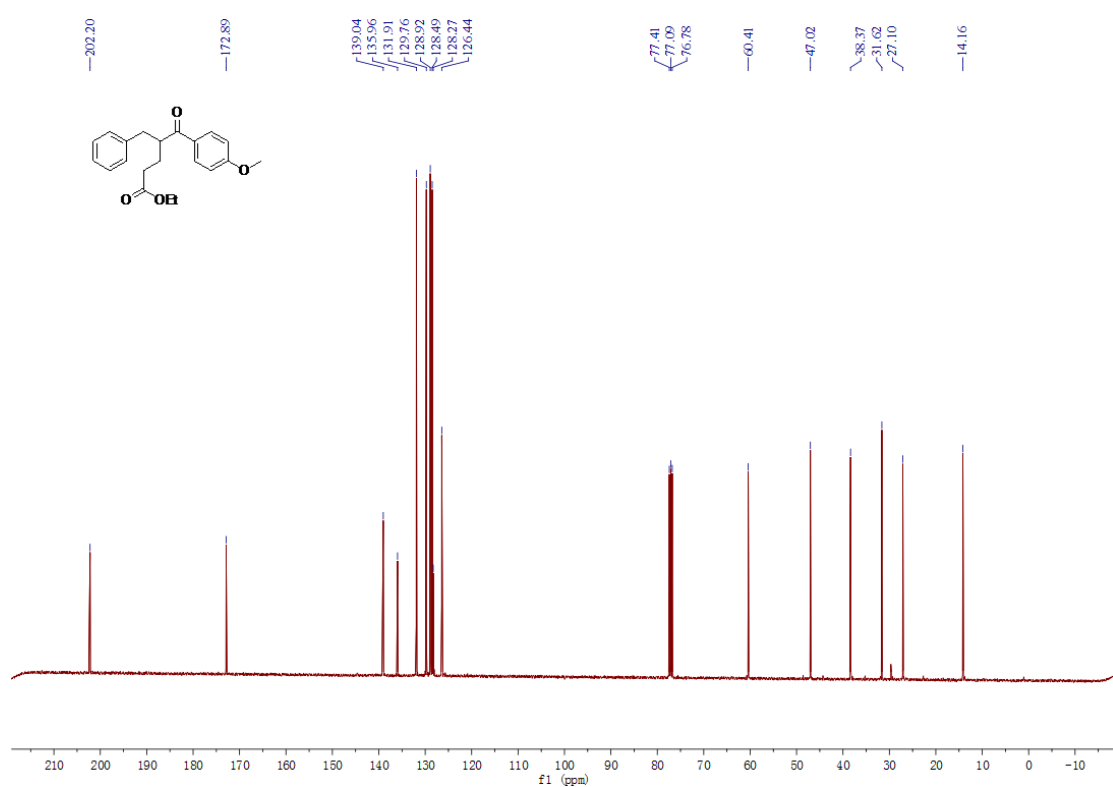

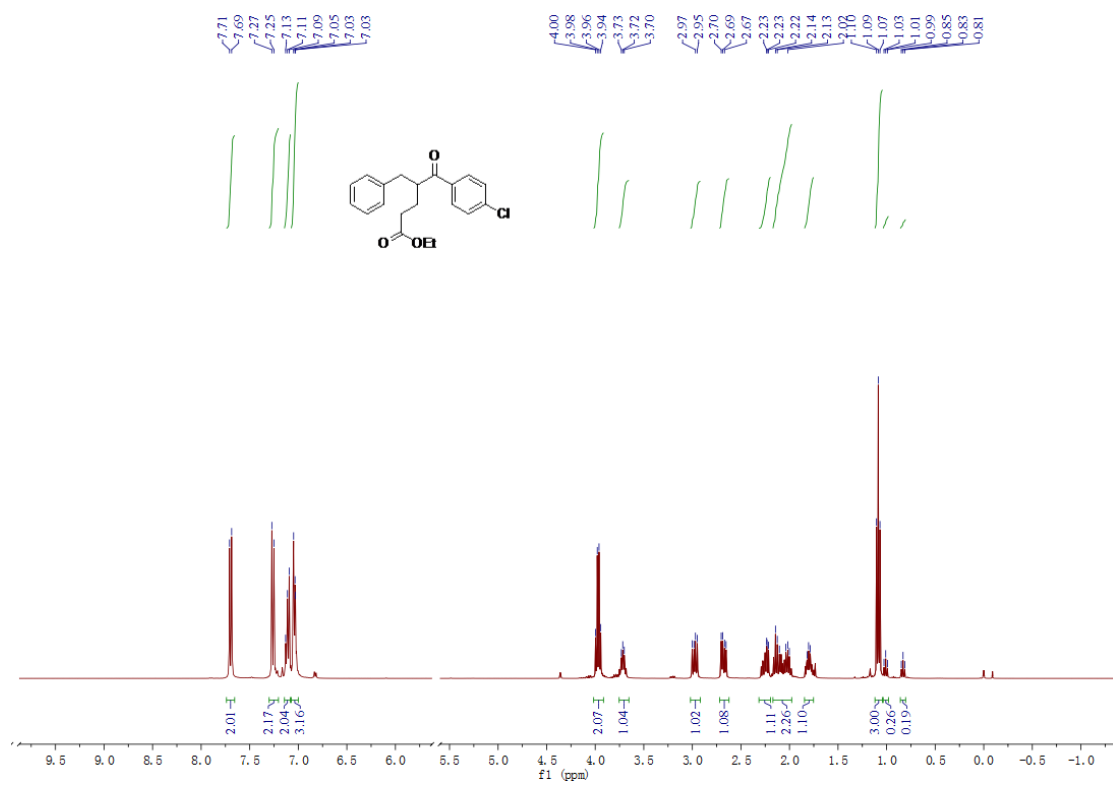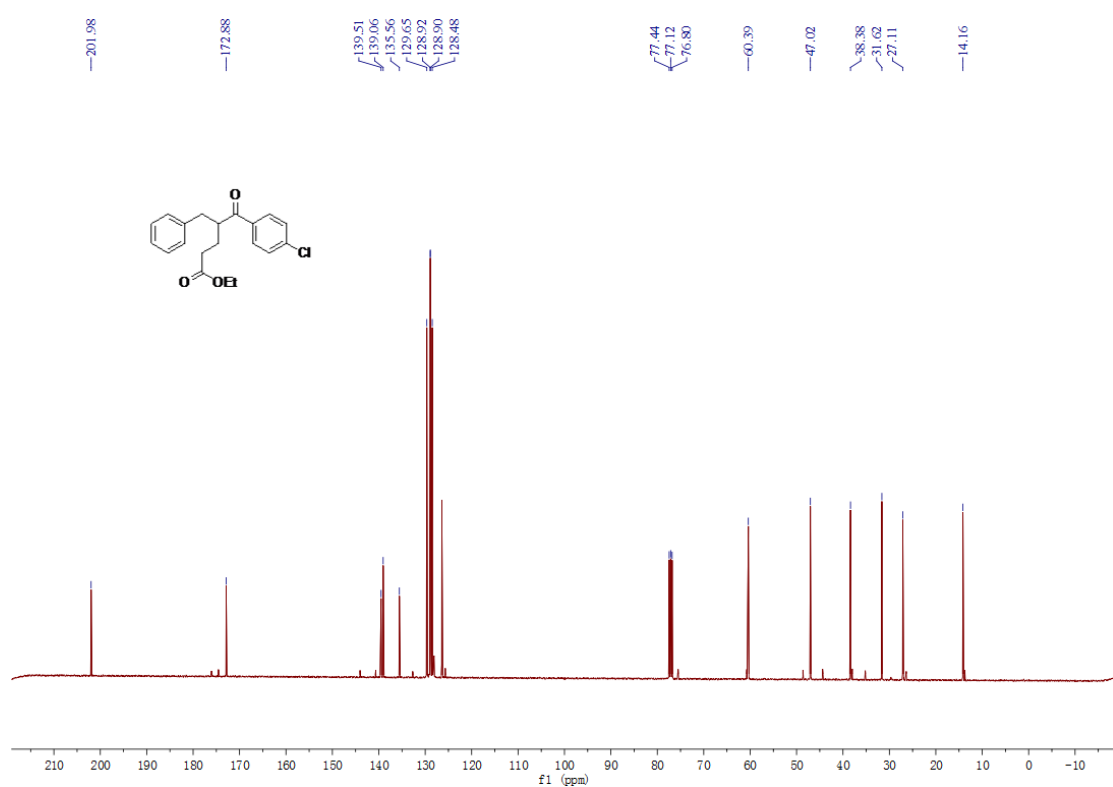

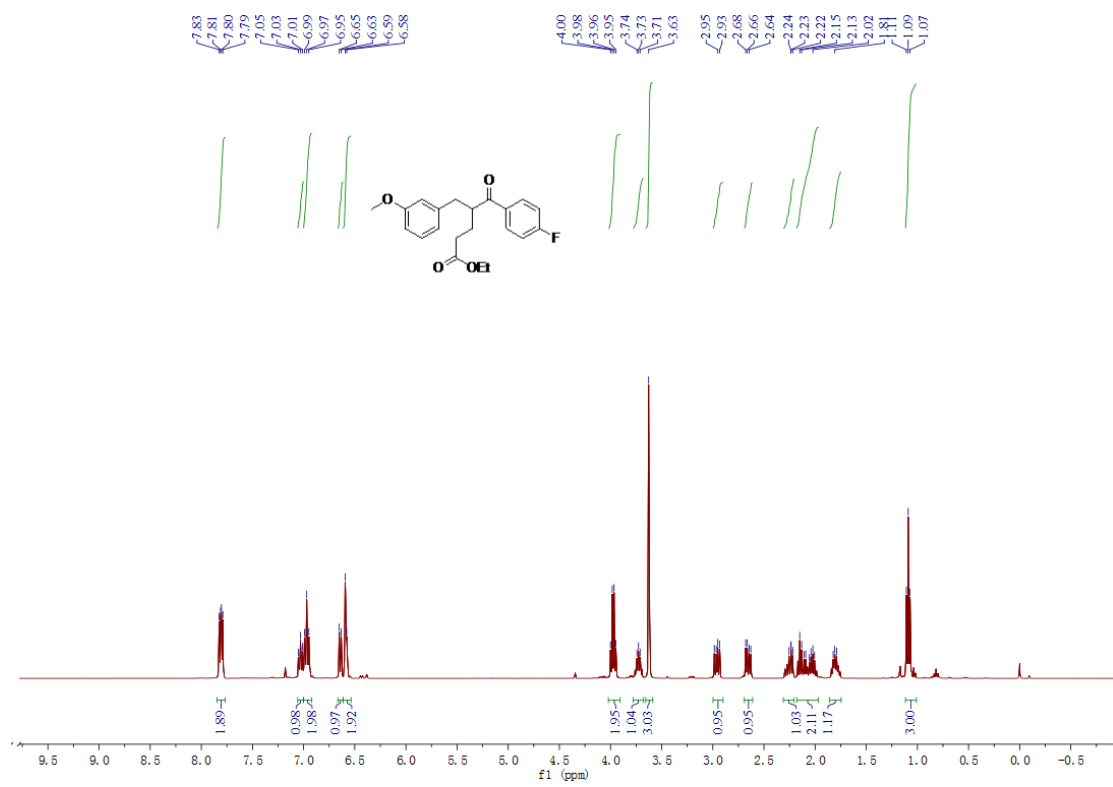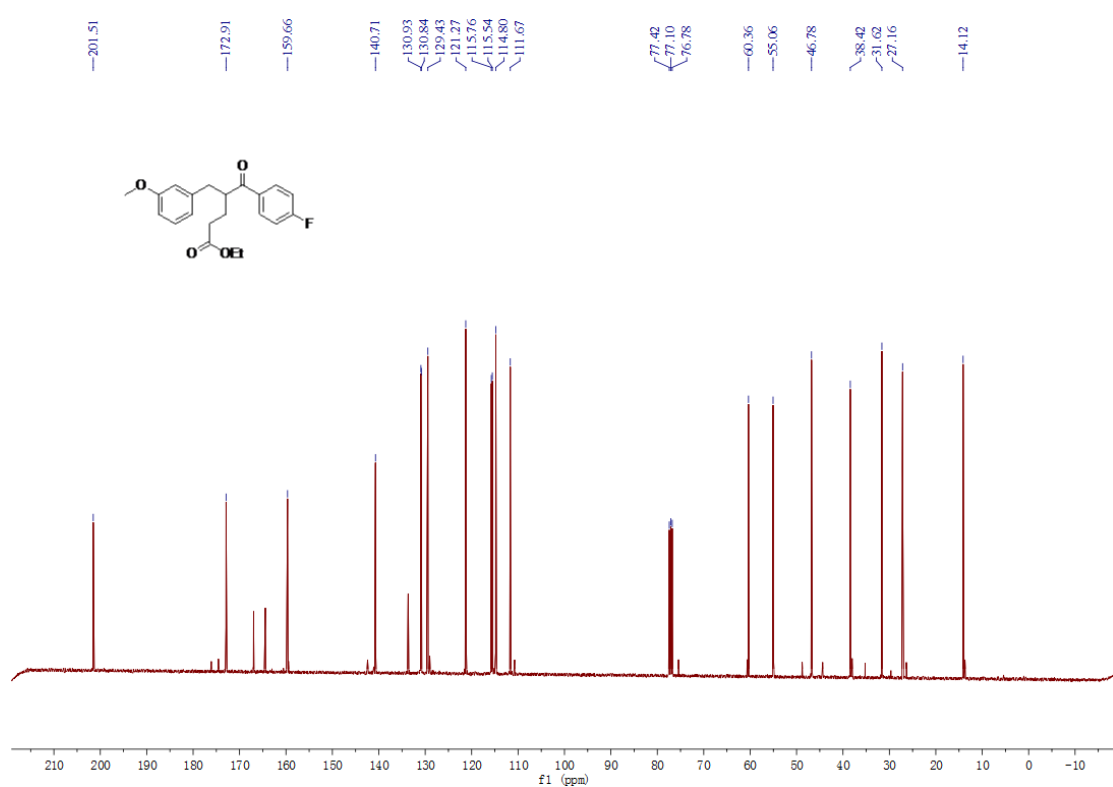

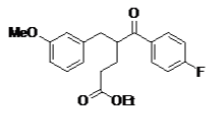

$^{19}\text{F}$  NMR (471 MHz,  $\text{CDCl}_3$ )  $\delta$  -105.17 (s).

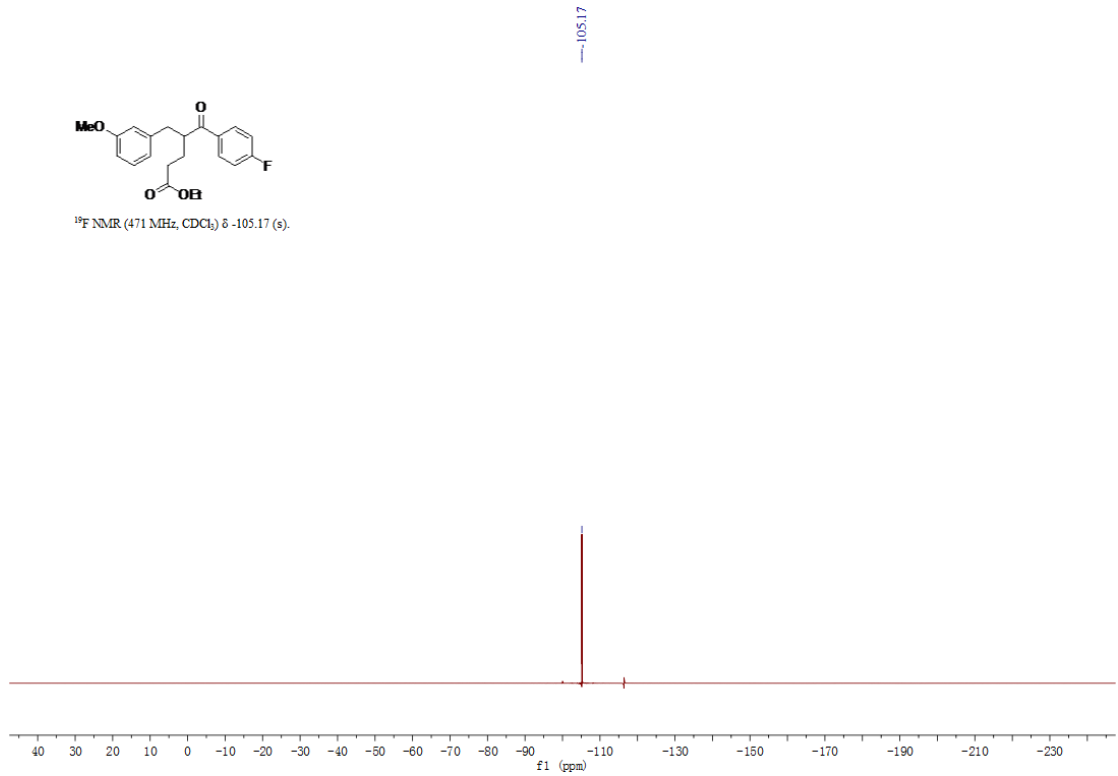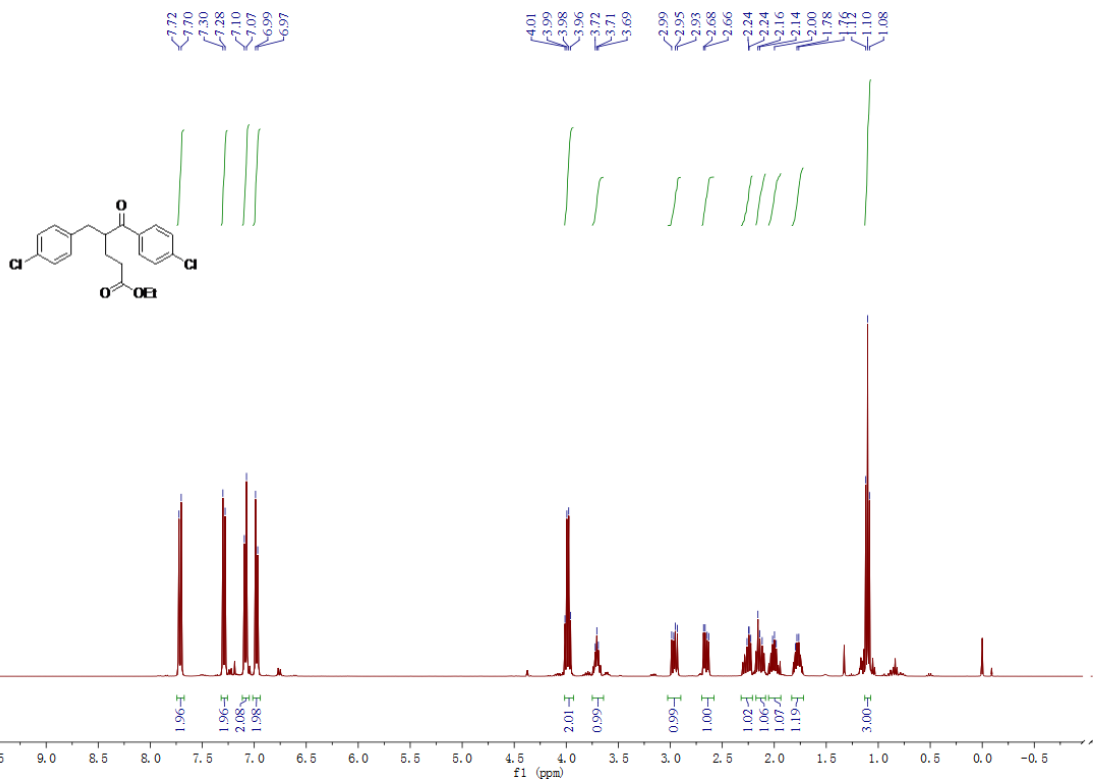

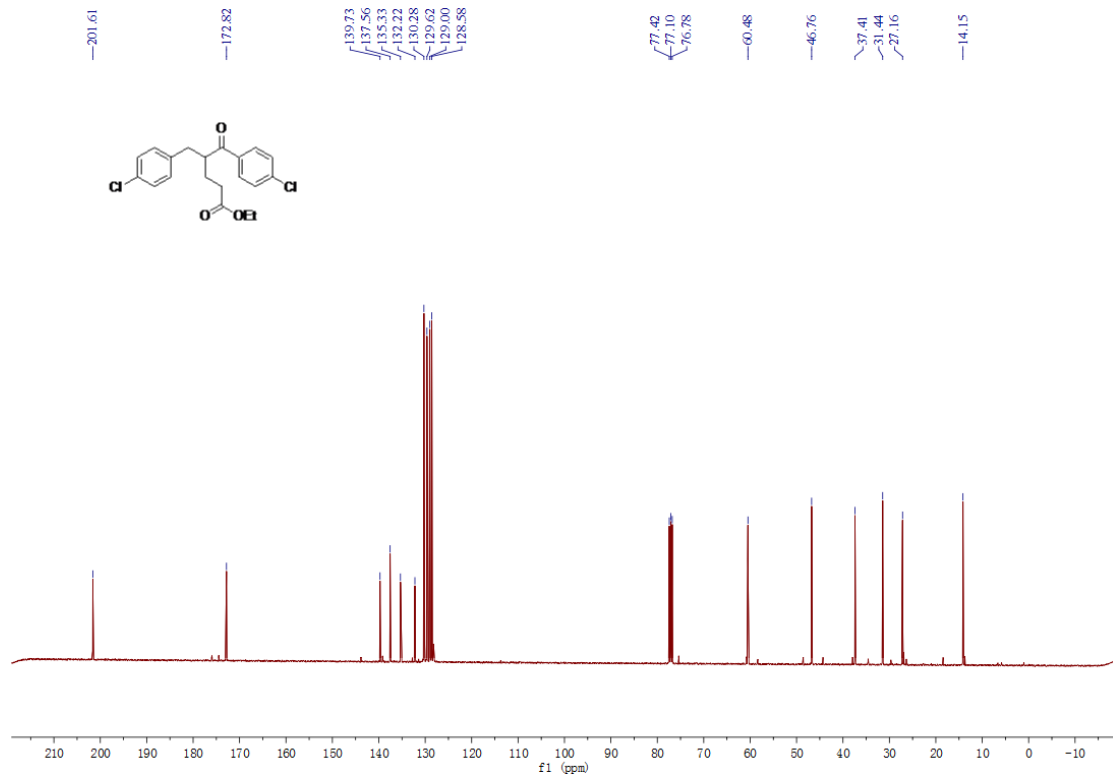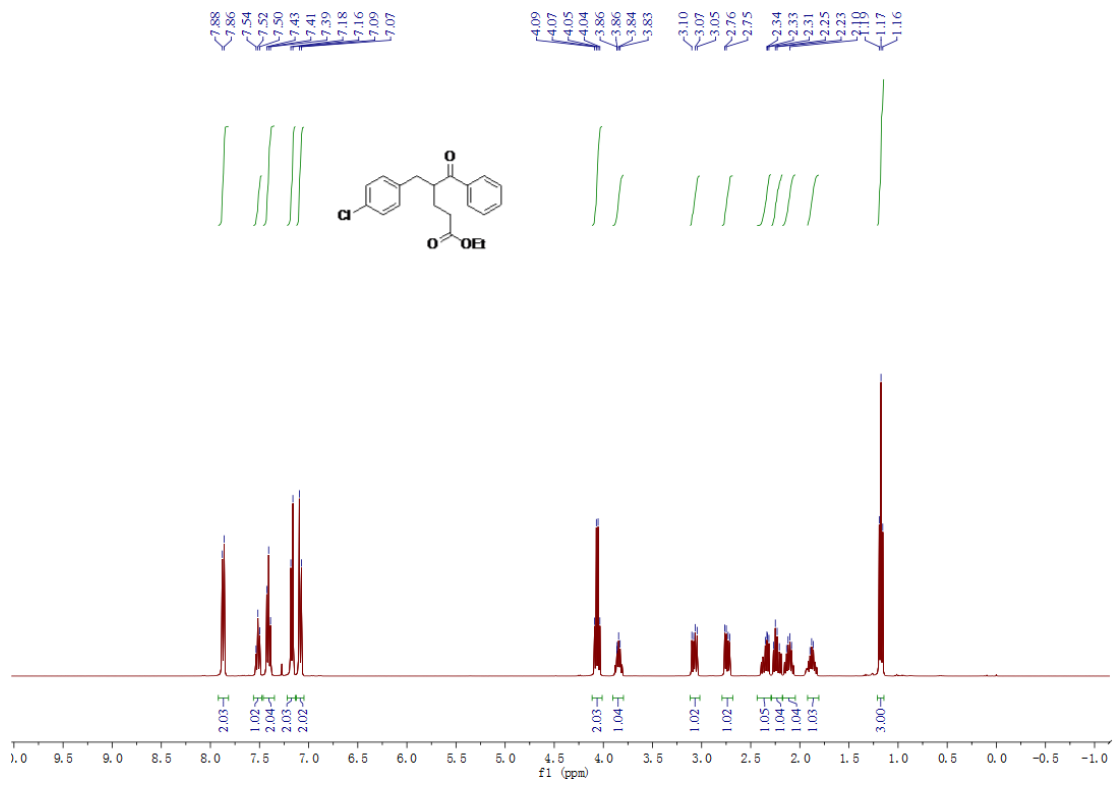



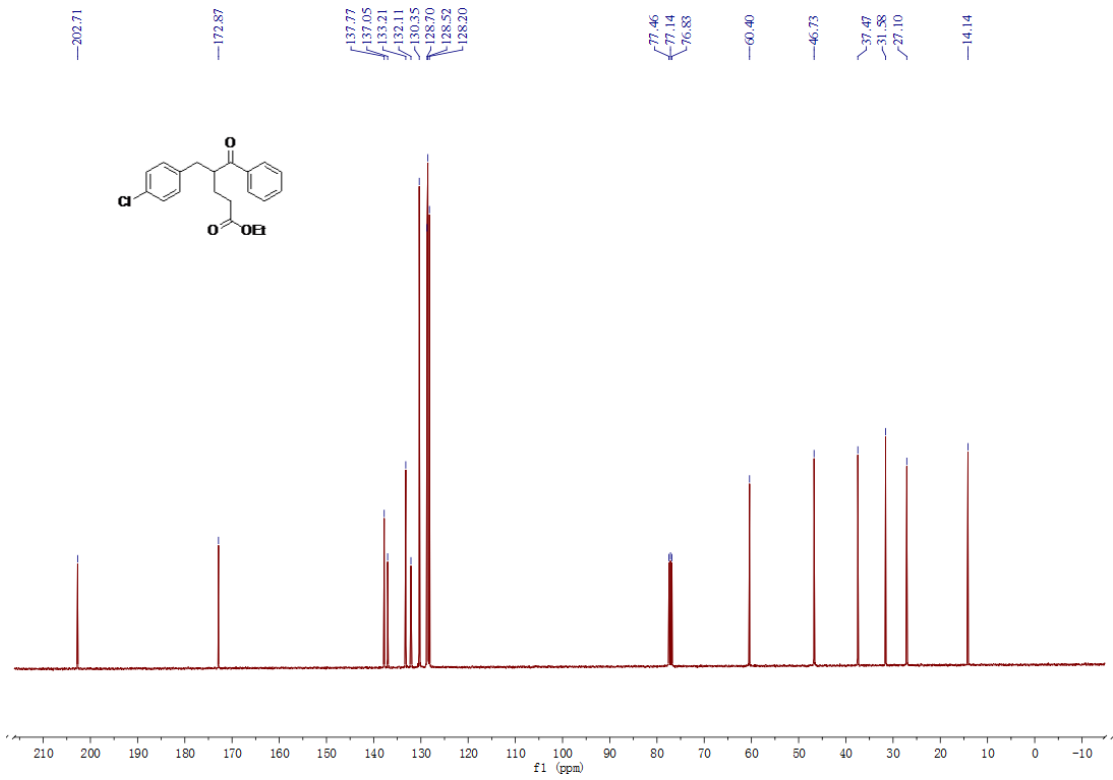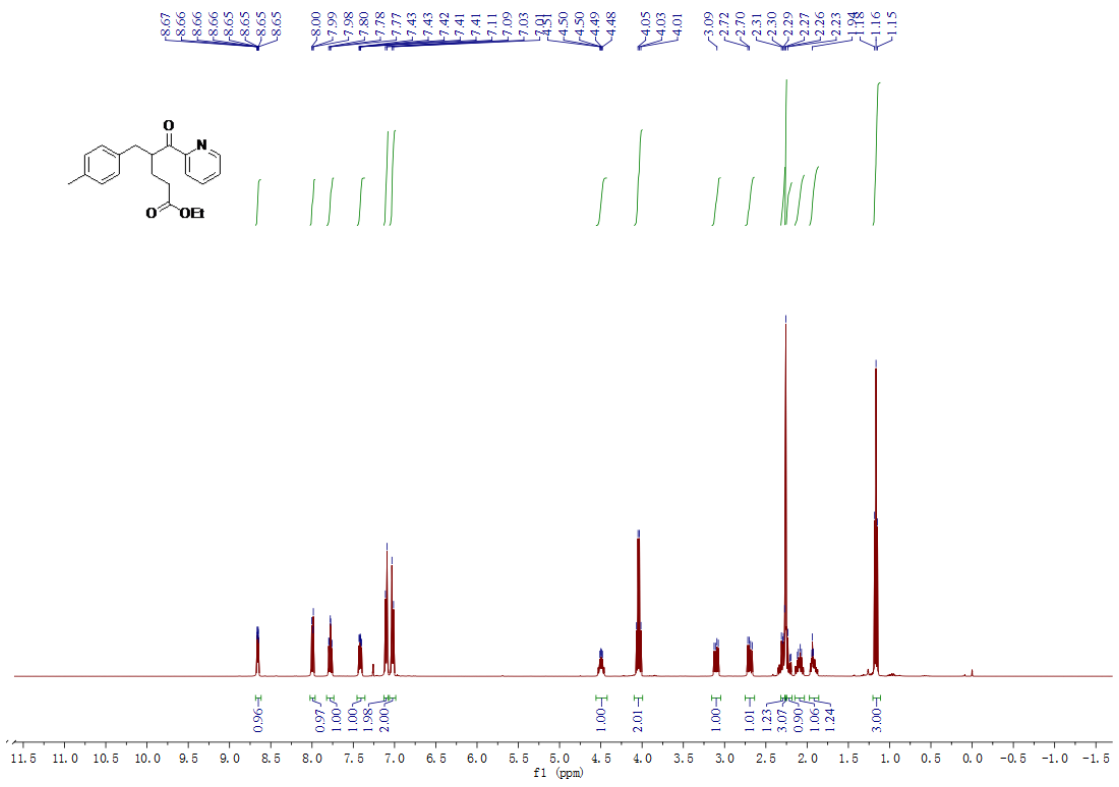

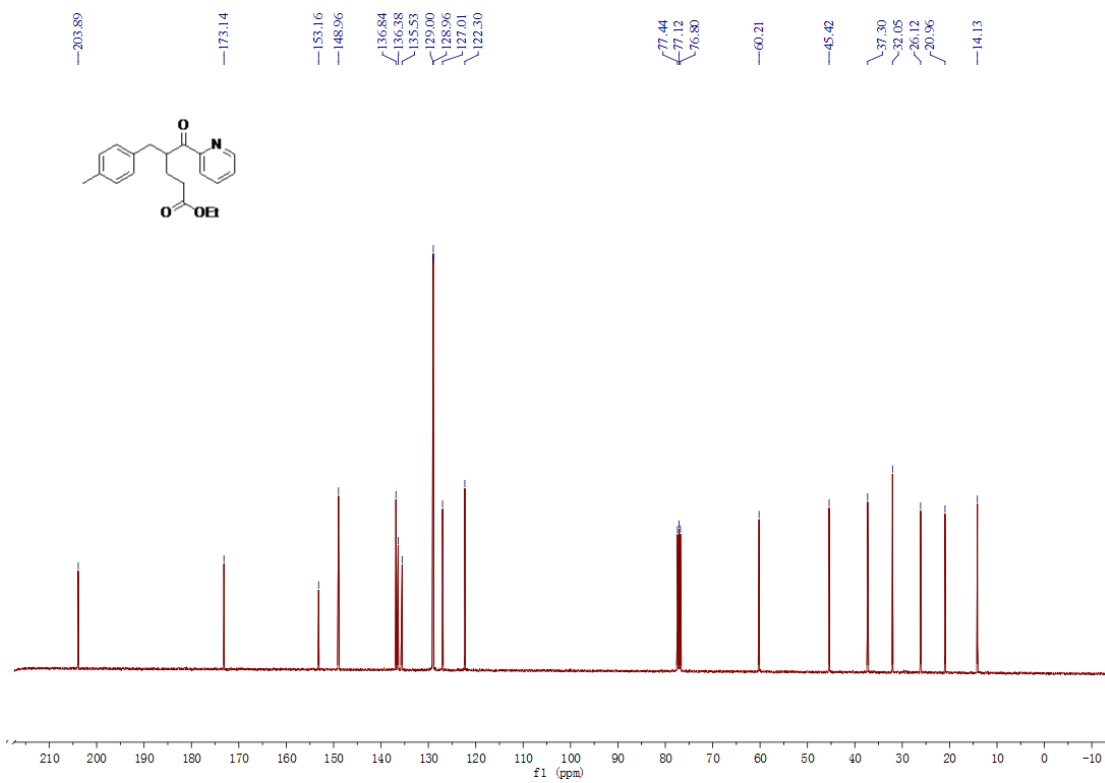

Supplement: c7ra10541j1.pdf [file c7ra10541j1.pdf]
